# Supplementary material for: ToxDBScan: Large-Scale Similarity Screening of Toxicological Databases for Drug Candidates
Source: Int J Mol Sci. 2014 Oct 21;15(10):19037–55. doi: 10.3390/ijms151019037 (PMC4227259; doi:10.3390/ijms151019037)
Supplement: Supplementary File 1 [file ijms-15-19037-s001.zip]

Archive with 4 entries (4 files):
- ijms-64426-Figure S1.pdf
- Table S1 Compound Annotation.xls
- Table S2 TG-GATEs Compounds.xls
- Table S3 Drugmatrix Compounds.xls
