# Supplementary material for: ToxDBScan: Large-Scale Similarity Screening of Toxicological Databases for Drug Candidates
Source: Int J Mol Sci. 2014 Oct 21;15(10):19037–55. doi: 10.3390/ijms151019037 (PMC4227259; doi:10.3390/ijms151019037)
Supplement: Supplementary File 1 [file ijms-15-19037-s001.zip › Table S1 Compound Annotation.xls]

## Sheet: annotation
Table S1. Annotation of chemicals in ToxDBScan. Three hundred nine chemicals are included in either TG-GATEs, DrugMatrix or both. For each chemical, the hepatocarcinogenicity and genotoxicity are provided, if contained in CPDB.
Cohemical	Short name	CAS number	Hepatocarcinogenicity	Genotoxicity	Class	DB
1,1-Dichloroethene	DCE	75-35-4	0	NA	NC	DM
2-Nitrofluorene	NF	607-57-8	1	1	GC	TGG
3-Methylcholanthrene	MCT	56-49-5	0	1	NC	TGG, DM
Trichloroacetic Acid	CAA	76-03-9	0	0	NC	DM
6-Mercaptopurine	MPU	74-61-3	0	1	NC	DM
Allyl Alcohol	AA	107-18-6	0	0	NC	TGG, DM
Acetamide	AAA	60-35-5	1	0	NGC	TGG
Acetamidofluorene	AAF	53-96-3	1	1	GC	TGG, DM
Acarbose	ACA	56180-94-0	NA	NA	NC	TGG
Acetazolamide	ACZ	59-66-5	0	NA	NC	TGG, DM
Adapin	ADP	1668-19-5	NA	NA	U	TGG
Aflatoxin B1	AFB1	1162-65-8	1	1	GC	TGG, DM
Aminoglutethimide	AGE	125-84-8	0	NA	NC	DM
Ajmaline	AJM	4360-12-07	NA	NA	U	TGG
Albendazole	ALB	54965-21-8	0	0	NC	DM
Amlodipine	ALP	88150-42-9	0	0	NC	DM
Altretamine	ALT	645-05-6	NA	NA	U	DM
Amiodarone	AM	1951-25-3	0	0	NC	TGG, DM
Aminosalicylic Acid	AMA	65-49-6	NA	NA	U	DM
Amphotericin B	AMB	1397-89-3	NA	NA	U	TGG
Amitriptyline	AMT	50-48-6	NA	NA	U	TGG
Alpha-Naphthoflavone	aNF	604-59-1	NA	NA	U	DM
Naphthyl Isothiocyanate	ANIT	551-06-4	0	NA	NC	TGG, DM
Anastrozole	ANZ	120511-73-1	1	NA	U	DM
Acetaminophen	APAP	103-90-2	1	0	NGC	TGG, DM
Allopurinol	APL	315-30-0	NA	NA	NC	TGG
Artemisinin	ART	63968-64-9	NA	NA	U	DM
Aspirin	ASA	50-78-2	0	0	NC	TGG, DM
Amantadine	ATD	768-94-5	NA	NA	U	DM
Atorvastatin	ATV	134523-03-8	0	0	NC	DM
Azathioprine	AZP	446-86-6	0	1	NC	TGG, DM
Bis(2-Ethylhexyl)Phthalate	B2EP	15495-94-0	1	0	NGC	DM
Balsalazide	BAL	213594-60-6	0	0	NC	DM
Benzbromarone	BBr	3562-84-3	NA	NA	NC	TGG
Bromobenzene	BBZ	108-86-1	NA	NA	U	TGG
Bucetin	BCT	1083-57-4	NA	NA	U	TGG
Bendazac	BDZ	20187-55-7	NA	NA	NC	TGG
Beta-Estradiol 3-Benzoate	bE3B	50-50-0	NA	NA	U	DM
Bromoethylamine	BEA	2576-47-8	NA	NA	NC	TGG
Benzethonium Chloride	BEC	121-54-0	0	0	NC	DM
Beta-Estradiol	bED	50-28-2	NA	0	U	DM
Bezafibrate	BEZ	41859-67-0	NA	NA	U	DM
Butylated Hydroxyanisole	BHA	25013-16-5	0	0	NC	TGG
Bisphenol A	BISa	27100-33-0	0	0	NC	DM
Betamethasone	bMS	378-44-9	NA	NA	U	DM
Beta-Naphthoflavone	bNF	6051-87-2	NA	NA	U	DM
Bortezomib	BOR	179324-69-7	NA	NA	U	TGG
Buthionine Sulfoximine	BSO	5072-26-4	NA	NA	U	TGG
Benzothiazyl Disulfide	BTD	120-78-5	NA	1	U	DM
Bithionol	BTN	97-18-7	NA	0	U	DM
Benziodarone	BZD	68-90-6	NA	NA	NC	TGG
Catechol	CAC	12385-08-9	0	0	NC	DM
Caffeine	CAF	58-08-2	0	0	NC	TGG
Captopril	CAP	62571-86-2	NA	NA	NC	TGG
Carbimazole	CARB	22232-54-8	NA	NA	U	DM
Carboplatin	CBP	41575-94-4	NA	NA	U	TGG
Carbamazepine	CBZ	298-46-4	1	0	NGC	TGG, DM
Cyclopropane Carboxylic Acid	CCA	1759-53-1	NA	NA	U	DM
Carbon Tetrachloride	CCL4	56-23-5	1	0	NGC	TGG, DM
Cerivastatin	CER	143201-11-0	1	0	NGC	DM
Clofibrate	CFB	637-07-0	1	0	NGC	TGG, DM
1% Cholesterol + 0.25% Sodium Cholate	CHDS	57-88-5	NA	NA	U	TGG
Chlorambucil	CHA	305-03-3	0	1	NC	DM
Chlorpheniramine	CHL	132-22-9	NA	NA	U	TGG
Chloroform	CHO	67-66-3	1	0	NGC	DM
Cholecalciferol	CHO	67-97-0	NA	NA	U	DM
Cycloheximide	CHX	66-81-9	NA	NA	U	TGG
Cimetidine	CIM	51481-61-9	0	NA	NC	TGG
Cinnarizine	CIN	298-57-7	NA	NA	U	DM
Citalopram	CIT	59729-33-8	0	0	NC	DM
Chlormadinone	CLM	1961-77-9	NA	NA	NC	TGG
Clofibric Acid	CLO	882-09-7	1	0	NGC	DM
Clomiphene	CLP	911-45-5	NA	NA	U	DM
Cephalothin	CLT	153-61-7	NA	NA	NC	TGG
Clonazepam	CLZ	1622-61-3	NA	NA	U	DM
Coumarin	CMA	91-64-5	1	1	GC	TGG
Chlormezanone	CMN	80-77-3	NA	NA	U	TGG
Chloramphenicol	CMP	56-75-7	NA	0	NC	TGG
Carmustine	CMT	154-93-8	NA	NA	U	DM
Colchicine	COL	64-86-8	NA	NA	NC	TGG
Cortisone	COR	53-06-5	NA	NA	U	DM
Cyclophosphamide	CPA	50-18-0	0	1	NC	TGG
Clomipramine	CPM	303-49-1	0	0	NC	TGG, DM
Chlorpropamide	CPP	94-20-2	0	0	NC	TGG
Cyproterone Acetate	CPR	427-51-0	1	0	NGC	DM
Ciprofloxacin	CPX	85721-33-1	NA	NA	NC	TGG
Chlorpromazine	CPZ	50-53-3	NA	NA	NC	TGG
Crotamiton	CRO	483-63-6	NA	NA	U	DM
Cyclosporine A	CSA	59865-13-3	0	0	NC	TGG, DM
Cisplatin	CSP	15663-27-1	NA	NA	NC	TGG
Closantel	CST	57808-65-8	0	0	NC	DM
Cytarabine	CTB	147-94-4	NA	NA	U	DM
Clotrimazole	CTM	23593-75-1	0	0	NC	DM
Carvedilol	CVD	72956-09-3	0	0	NC	DM
Chloroxylenol	CXN	88-04-0	NA	NA	U	DM
Methylene Dianiline	DAPM	101-77-9	1	1	GC	TGG, DM
Daunorubicin	DAU	20830-81-3	0	1	NC	DM
Desmopressin Acetate	DDAVP	62288-83-9	NA	NA	U	TGG
Diethyl Maleate	DEM	141-05-09	NA	NA	U	TGG
Nitrosodiethylamine	DEN	55-18-5	1	1	GC	TGG, DM
Diethylstilbestrol	DES	56-53-1	1	0	NGC	DM
Dexamethasone	DEX	50-02-2	0	NA	NC	TGG, DM
Diclofenac	DFNa	15307-86-5	0	0	NC	TGG, DM
Digoxin	DIG	20830-75-5	NA	NA	U	DM
Diltiazem	DIL	42399-41-7	NA	NA	NC	TGG
Disopyramide	DIS	3737-09-05	NA	NA	NC	TGG
N-Nitrosodimethylamine	DMN	62-75-9	1	1	GC	DM
2,4-Dinitrophenol	DNP	51-28-5	NA	0	U	TGG
Danazol	DNZ	17230-88-5	0	NA	NC	TGG, DM
Doxorubicin	DOX	23214-92-8	0	1	NC	TGG, DM
Disulfiram	DSF	97-77-8	0	0	NC	TGG
Dantrolene	DTL	7261-97-4	NA	NA	U	TGG
Diazepam	DZP	439-14-5	0	0	NC	TGG, DM
Ethambutol	EBU	74-55-5	NA	NA	NC	TGG
Econazole	ECO	27220-47-9	NA	NA	U	DM
Ethinylestradiol	EE	57-63-6	1	0	NGC	TGG, DM
Ethylestrenol	EES	965-90-2	NA	NA	U	DM
Erythromycin	EMC	82343-12-2	0	0	NC	DM
Erythromycin Ethylsuccinate	EME	1264-62-6	NA	NA	NC	TGG
Enalapril	ENA	75847-73-3	NA	NA	NC	TGG
Enoxacin	ENO	74011-58-8	NA	NA	U	DM
Epirubicin	EPI	56420-45-2	0	1	NC	DM
Erlotinib	ERL	183319-69-9	NA	NA	U	DM
Estriol	EST	50-27-1	NA	NA	U	DM
Ethionine	ET	13073-35-3	1	0	NGC	TGG
Etodolac	ETD	41340-25-4	0	NA	NC	DM
Ethionamide	ETH	536-33-4	0	0	NC	TGG
Ethanol	ETN	64-17-5	1	0	NGC	TGG, DM
Etoposide	ETP	33419-42-0	NA	NA	U	TGG
Ethisterone	ETT	434-03-7	NA	NA	U	DM
Isoeugenol	EUG	97-54-1	0	0	NC	DM
Famotidine	FAM	76824-35-6	NA	NA	NC	TGG
Fenbendazole	FBZ	43210-67-9	1	0	NGC	DM
Fludrocortisone Acetate	FCA	514-36-3	NA	NA	U	DM
Fenofibrate	FFB	49562-28-9	1	0	NGC	TGG, DM
Finasteride	FIN	98319-26-7	0	0	NC	DM
Fluocinolone Acetonide	FLA	67-73-2	NA	NA	U	DM
Flubendazole	FLB	31430-15-6	0	0	NC	DM
Fluconazole	FLU	86386-73-4	1	0	NGC	DM
Fluoxetine Hydrochloride	FLX	56296-78-7	NA	NA	U	TGG
Fluphenazine	FP	69-23-8	0	NA	NC	TGG, DM
Fluvastatin	FST	93957-54-1	0	0	NC	DM
Flutamide	FT	13311-84-7	NA	NA	U	TGG
Furosemide	FUR	54-31-9	0	0	NC	TGG
Galactosamine	GaN	7535-00-4	NA	NA	U	TGG
Glibenclamide	GBC	10238-21-8	NA	NA	NC	TGG
Gefitinib	GEF	184475-35-2	NA	NA	U	TGG, DM
Genistein	GEN	446-72-0	NA	NA	U	DM
Griseofulvin	GF	126-07-08	NA	NA	NC	TGG
Gemfibrozil	GFZ	25812-30-0	1	0	NGC	TGG, DM
Glipizide	GLI	29094-61-9	0	NA	NC	DM
Gentamicin	GMC	1403-66-3	0	NA	NC	TGG, DM
Gentian Violet	GV	548-62-9	NA	0	U	DM
Hexachlorobenzene	HCB	118-74-1	1	0	NGC	TGG
Hydrocortisone	HCO	50-23-7	0	0	NC	DM
Hexachlorophene	HCP	70-30-4	0	0	NC	DM
Haloperidol	HPL	52-86-8	NA	NA	NC	TGG
Hydrazine	HYD	302-01-2	1	1	GC	DM
Hydroxyzine	HYZ	68-88-2	NA	NA	U	TGG
Ibuprofen	IBU	15687-27-1	0	0	NC	TGG, DM
Itraconazole	ICZ	84604-65-9	0	0	NC	DM
Idebenone	IDE	58186-27-9	NA	NA	U	DM
Ifosfamide	IFO	84711-20-6	0	1	NC	DM
Interleukin 1 Beta, Rat	IL1b		NA	NA	U	DM
Interleukin 6, Rat	IL6		NA	NA	U	DM
Indomethacin	IM	53-86-1	0	0	NC	TGG, DM
Imatinib	IMA	152459-95-5	0	1	NC	TGG, DM
Imipramine	IMI	50-49-7	NA	NA	U	TGG
Isoniazid	INAH	54-85-3	1	1	GC	TGG
Iproniazid	IPA	54-92-2	NA	NA	NC	TGG
Isotretinoin	ITT	4759-48-2	1	0	NGC	DM
Ketoconazole	KC	65277-42-1	0	0	NC	TGG, DM
Ketorolac	KR	74103-06-3	0	0	NC	DM
Lead (Ii) Acetate	L2A	301-04-2	0	0	NC	DM
Lead(Iv) Acetate	L4A	546-67-8	0	1	NC	DM
Lorazepam	LAP	846-49-1	0	0	NC	DM
Labetalol	LBT	36894-69-6	NA	NA	U	TGG
Leflunomide	LEF	75706-12-6	0	0	NC	DM
Lomefloxacin	LFC	98079-51-7	NA	NA	U	DM
Lornoxicam	LNX	70374-39-9	0	NA	NC	TGG
Lovastatin	LOV	75330-75-5	1	0	NGC	DM
Lps	LPS	73666-47-4	NA	NA	U	TGG
Lipopolysaccharide E. Coli O55 B5	LPSEC		NA	NA	U	DM
Lomustine	LS	13010-47-4	0	1	GC	TGG, DM
Letrozole	LTZ	112809-51-5	0	0	NC	DM
Mebendazole	MBD	31431-39-7	0	0	NC	DM
Monocrotaline	MCT	315-22-0	1	0	GC	TGG
Methyldopa	MDP	555-30-6	NA	NA	NC	TGG
Mefenamic Acid	MEF	61-68-7	NA	NA	NC	TGG
Mestranol	MES	72-33-3	NA	0	U	DM
Mexiletine	MEX	31828-71-4	NA	NA	NC	TGG
Metformin	MFM	657-24-9	NA	NA	NC	TGG
Megestrol Acetate	MGA	595-33-5	0	0	NC	DM
Miconazole	MIC	22916-47-8	NA	NA	U	DM
Mifepristone	MIF	122742-25-0	NA	NA	U	DM
Mitomycin C	MITc	1404-00-8	0	1	NC	DM
Mln-518	MLN	387867-13-2	NA	NA	U	DM
Meloxicam	MLX	71125-38-7	0	NA	NC	TGG, DM
N-Methyl-N-Nitrosourea	MNU	684-93-5	0	1	NC	TGG
Modafinil	MOD	68693-11-8	0	0	NC	DM
Methapyrilene	MP	135-23-9	1	0	NGC	TGG, DM
Methyl Salicylate	MSA	119-36-8	0	NA	NC	DM
Methyltestosterone	MTS	58-18-4	0	NA	NC	TGG, DM
Methotrexate	MTX	59-05-2	0	1	NC	DM
Methimazole	MTZ	60-56-0	0	0	NC	TGG, DM
Moxisylyte	MXS	54-32-0	NA	NA	NC	TGG
Nafenopin	NAF	3771-19-5	1	0	NGC	DM
Nitrofurantoin	NFT	67-20-9	0	1	NC	TGG
Nitrofurazone	NFZ	59-87-0	0	1	NC	TGG
Nicotinic Acid	NIC	59-67-6	NA	0	NC	TGG
Nifedipine	NIF	21829-25-4	NA	NA	NC	TGG
Nimesulide	NIM	51803-78-2	0	NA	NC	TGG, DM
Neomycin	NMC	3947-65-7	0	0	NC	DM
N-Nitrosomorpholine	NMOR	59-89-2	NA	1	U	TGG
Nimetazepam	NMZ	2011-67-8	NA	NA	U	DM
N,N-Dimethylformamide	NND	68-12-2	0	0	NC	DM
Norethindrone Acetate	NOA	8015-12-1	1	NA	U	DM
Norethindrone	NOR	68-22-4	1	NA	U	DM
Phenylanthranilic Acid	NPAA	91-40-7	NA	NA	NC	TGG
Naproxen	NPX	22204-53-1	0	0	NC	TGG, DM
Nystatin	NST	1400-61-9	NA	NA	U	DM
Nitrazepam	NZP	146-22-5	NA	NA	U	DM
Olanzapine	OLP	132539-06-1	0	0	NC	DM
Oxymetholone	OML	434-07-1	1	0	NGC	DM
Oxymetazoline	OMZ	1491-59-4	NA	NA	U	DM
Omeprazole	OPZ	73590-58-6	1	0	NGC	TGG
Oxytetracycline	OTC	79-57-2	0	0	NC	DM
Oxfendazole	OXF	53716-50-0	0	0	NC	DM
Puromycin Aminonucleoside	PAN	58-60-6	NA	NA	NC	TGG
Papaverine	PAP	58-74-2	NA	NA	U	TGG
Phenobarbital	PB	50-06-6	1	0	NGC	TGG, DM
Piclamilast	PCL	144035-83-6	0	NA	NC	DM
Phenacetin	PCT	62-44-2	0	1	NC	TGG
Procarbazine	PCZ	671-16-9	0	1	NC	DM
Prednisolone	PDS	50-24-8	1	0	NGC	DM
Penicillamine	PEN	52-67-5	NA	NA	NC	TGG
Progesterone	PGT	57-83-0	0	0	NC	DM
Perhexiline	PH	6621-47-2	NA	NA	NC	TGG
Phalloidin	PHA	17466-45-4	NA	NA	U	TGG
Phenylbutazone	PhB	50-33-9	0	0	NC	TGG
Phenytoin	PHE	57-41-0	0	0	NC	TGG
Phorone	PHO	504-20-1	NA	NA	U	TGG
Pioglitazone	PIO	111025-46-8	0	0	NC	DM
Pemoline	PML	18968-99-5	0	NA	NC	TGG, DM
Promethazine	PMZ	60-87-7	0	0	NC	TGG, DM
Pantoprazole	PNZ	102625-70-7	1	0	NGC	DM
Propranolol	PPL	525-66-6	NA	NA	NC	TGG
Pramoxine	PRA	140-65-8	NA	NA	U	DM
Primidone	PRI	125-33-7	0	0	NC	DM
Propylthiouracil	PTU	51-52-5	0	0	NC	TGG, DM
Phenothiazine	PTZ	92-84-2	NA	0	U	DM
Pyrogallol	PYR	87-66-1	NA	NA	U	DM
Quinidine	QND	56-54-2	NA	NA	NC	TGG
Rabeprazole	RAB	117976-89-3	0	1	NC	DM
Ranitidine	RAN	66357-35-5	NA	NA	NC	TGG
Raloxifene	RAX	84449-90-1	0	0	NC	DM
Rifabutin	RFB	72559-06-9	0	0	NC	DM
Rosiglitazone Maleate	RGZ	155141-29-0	0	0	NC	TGG, DM
Rifampicin	RIF	13292-46-1	1	0	NGC	TGG
Rofecoxib	ROC	162011-90-7	0	0	NC	DM
Roflumilast	ROF	162401-32-3	NA	NA	U	DM
Rolipram	ROL	61413-54-5	NA	NA	U	DM
Rotenone	ROT	83-79-4	0	0	NC	TGG
Roxithromycin	ROX	80214-83-1	NA	NA	U	DM
Salicylamide	SAC	65-45-2	NA	NA	U	DM
Safrole	SAF	94-59-7	1	1	GC	DM
Salicylic Acid	SAL	69-72-7	NA	NA	U	DM
Sodium Arsenite	SAR	7784-46-5	0	NA	NC	DM
Sildenafil	SIL	139755-83-2	0	0	NC	DM
Sulpiride	SLP	15676-16-1	NA	NA	NC	TGG
Spironolactone	SNT	52-01-7	1	0	NGC	DM
Sotalol	SOT	27948-47-6	0	0	NC	DM
Sulfasalazine	SS	599-79-1	0	0	NC	TGG
Simvastatin	SST	79902-63-9	1	0	NGC	TGG, DM
Stanozolol	STA	10418-03-8	NA	NA	U	DM
Sulindac	SUL	38194-50-2	0	NA	NC	TGG, DM
Stavudine	SVD	3056-17-5	0	1	NC	DM
Streptozotocin	SZC	18883-66-4	0	1	NC	DM
Thioacetamide	TAA	62-55-5	1	0	NGC	TGG, DM
Tacrine	TAC	321-64-2	NA	NA	U	TGG
Tannic Acid	TAN	1401-55-4	0	1	NC	TGG
Terbinafine	TBF	91161-71-6	NA	NA	U	TGG
Thiabendazole	TBZ	148-79-8	0	0	NC	DM
Tetracycline	TC	60-54-8	NA	NA	NC	TGG
2,3,7,8-Tetrachlorodibenzo-P-Dioxin	TCDD	1746-01-6	1	0	NGC	DM
Ticlopidine	TCP	55142-85-3	NA	NA	U	TGG
3,3',4',5-Tetrachlorosalicylanilide	TCSA	1154-59-2	NA	NA	U	DM
Theophylline	TEO	58-55-9	0	0	NC	TGG
Tosufloxacin	TFX	100490-36-6	NA	NA	U	DM
Thioguanine	TGN	154-42-7	NA	NA	U	DM
Troglitazone	TGZ	97322-87-7	0	0	NC	DM
Tiopronin	TIO	1953-02-02	NA	NA	NC	TGG
Tolbutamide	TLB	64-77-7	0	0	NC	TGG
Trimethadione	TMD	127-48-0	0	NA	NC	TGG
Tamoxifen	TMX	10540-29-1	1	NA	U	TGG, DM
TNFa	TNF		NA	NA	U	TGG
Tropisetron	TPS	89565-68-4	0	0	NC	DM
Triamterene	TRI	396-01-0	0	0	NC	TGG
Thioridazine	TRZ	50-52-2	NA	NA	NC	TGG
Testosterone	TTR	571-41-5	1	0	NGC	DM
Tunicamycin	TUN	11089-65-9	NA	NA	U	TGG
Triazolam	TZM	28911-01-5	NA	NA	U	TGG
Vitamin A	VA	11103-57-4	NA	NA	NC	TGG
Vinblastine	VBT	143-67-9	NA	NA	U	DM
Vinorelbine	VNB	125317-39-7	NA	NA	U	DM
Valproic Acid	VPA	99-66-1	0	0	NC	TGG, DM
Wy-14643	WY	50892-23-4	1	0	NGC	TGG, DM
Zileuton	ZIL	111406-87-2	NA	NA	U	DM
Zomepirac	ZOM	64092-48-4	NA	NA	U	DM

## Sheet: full
name	short name	display name	cas	Hepatocarcinogenicity	Genotoxicity	Class	Class2	DB	Index
1,1-dichloroethene	1DCE	1,1-Dichloroethene	75-35-4	0	NA	NC	NC	DM	#N/A
2,3,7,8-tetrachlorodibenzo-p-dioxin	TCDD	2,3,7,8-Tetrachlorodibenzo-P-Dioxin	1746-01-6	1	0	NGC	C	DM	#N/A
3,3',4',5-tetrachlorosalicylanilide	TCSA	3,3',4',5-Tetrachlorosalicylanilide	1154-59-2	NA	NA	U	U	DM	#N/A
6-mercaptopurine	6MP	6-Mercaptopurine	74-61-3	0	1	NC	NC	DM	#N/A
albendazole	ALB	Albendazole	54965-21-8	0	0	NC	NC	DM	#N/A
alpha-naphthoflavone	aNF	Alpha-Naphthoflavone	604-59-1	NA	NA	U	U	DM	#N/A
altretamine	ALT	Altretamine	645-05-6	NA	NA	U	U	DM	#N/A
amantadine	ATD	Amantadine	768-94-5	NA	NA	U	U	DM	#N/A
aminoglutethimide	AGE	Aminoglutethimide	125-84-8	0	NA	NC	NC	DM	#N/A
aminosalicylic acid	AMA	Aminosalicylic Acid	65-49-6	NA	NA	U	U	DM	#N/A
amlodipine	ALP	Amlodipine	88150-42-9	0	0	NC	NC	DM	#N/A
anastrozole	ANZ	Anastrozole	120511-73-1	1	NA	U	C	DM	#N/A
artemisinin	ART	Artemisinin	63968-64-9	NA	NA	U	U	DM	#N/A
atorvastatin	ATV	Atorvastatin	134523-03-8	0	0	NC	NC	DM	#N/A
balsalazide	BAL	Balsalazide	213594-60-6	0	0	NC	NC	DM	#N/A
benzethonium chloride	BEC	Benzethonium Chloride	121-54-0	0	0	NC	NC	DM	#N/A
benzothiazyl disulfide	BTD	Benzothiazyl Disulfide	120-78-5	NA	1	U	U	DM	#N/A
beta-estradiol	bED	Beta-Estradiol	50-28-2	NA	0	U	U	DM	#N/A
beta-estradiol 3-benzoate	bE3B	Beta-Estradiol 3-Benzoate	50-50-0	NA	NA	U	U	DM	#N/A
beta-naphthoflavone	bNF	Beta-Naphthoflavone	6051-87-2	NA	NA	U	U	DM	#N/A
betamethasone	bMS	Betamethasone	378-44-9	NA	NA	U	U	DM	#N/A
bezafibrate	BEZ	Bezafibrate	41859-67-0	NA	NA	U	U	DM	#N/A
bis(2-ethylhexyl)phthalate	B2EP	Bis(2-Ethylhexyl)Phthalate	15495-94-0	1	0	NGC	C	DM	#N/A
bisphenol a	BISa	Bisphenol A	27100-33-0	0	0	NC	NC	DM	#N/A
bithionol	BTN	Bithionol	97-18-7	NA	0	U	U	DM	#N/A
carbimazole	CARB	Carbimazole	22232-54-8	NA	NA	U	U	DM	#N/A
carmustine	CMT	Carmustine	154-93-8	NA	NA	U	U	DM	#N/A
carvedilol	CVD	Carvedilol	72956-09-3	0	0	NC	NC	DM	#N/A
catechol	CAC	Catechol	12385-08-9	0	0	NC	NC	DM	#N/A
cerivastatin	CER	Cerivastatin	143201-11-0	1	0	NGC	C	DM	#N/A
chlorambucil	CHA	Chlorambucil	305-03-3	0	1	NC	NC	DM	#N/A
chloroxylenol	CXN	Chloroxylenol	88-04-0	NA	NA	U	U	DM	#N/A
cholecalciferol	CHO	Cholecalciferol	67-97-0	NA	NA	U	U	DM	#N/A
cinnarizine	CIN	Cinnarizine	298-57-7	NA	NA	U	U	DM	#N/A
citalopram	CIT	Citalopram	59729-33-8	0	0	NC	NC	DM	#N/A
clofibric acid	CLO	Clofibric Acid	882-09-7	1	0	NGC	C	DM	#N/A
clomiphene	CLP	Clomiphene	911-45-5	NA	NA	U	U	DM	#N/A
clonazepam	CLZ	Clonazepam	1622-61-3	NA	NA	U	U	DM	#N/A
closantel	CST	Closantel	57808-65-8	0	0	NC	NC	DM	#N/A
clotrimazole	CTM	Clotrimazole	23593-75-1	0	0	NC	NC	DM	#N/A
cortisone	COR	Cortisone	53-06-5	NA	NA	U	U	DM	#N/A
crotamiton	CRO	Crotamiton	483-63-6	NA	NA	U	U	DM	#N/A
cyclopropane carboxylic acid	CCA	Cyclopropane Carboxylic Acid	1759-53-1	NA	NA	U	U	DM	#N/A
cytarabine	CTB	Cytarabine	147-94-4	NA	NA	U	U	DM	#N/A
daunorubicin	DAU	Daunorubicin	20830-81-3	0	1	NC	NC	DM	#N/A
diethylstilbestrol	DES	Diethylstilbestrol	56-53-1	1	0	NGC	C	DM	#N/A
digoxin	DIG	Digoxin	20830-75-5	NA	NA	U	U	DM	#N/A
econazole	ECO	Econazole	27220-47-9	NA	NA	U	U	DM	#N/A
enoxacin	ENO	Enoxacin	74011-58-8	NA	NA	U	U	DM	#N/A
epirubicin	EPI	Epirubicin	56420-45-2	0	1	NC	NC	DM	#N/A
erlotinib	ERL	Erlotinib	183319-69-9	NA	NA	U	U	DM	#N/A
erythromycin	EMC	Erythromycin	82343-12-2	0	0	NC	NC	DM	#N/A
estriol	EST	Estriol	50-27-1	NA	NA	U	U	DM	#N/A
ethisterone	ETT	Ethisterone	434-03-7	NA	NA	U	U	DM	#N/A
ethylestrenol	EES	Ethylestrenol	965-90-2	NA	NA	U	U	DM	#N/A
etodolac	ETD	Etodolac	41340-25-4	0	NA	NC	NC	DM	#N/A
fenbendazole	FBZ	Fenbendazole	43210-67-9	1	0	NGC	C	DM	#N/A
finasteride	FIN	Finasteride	98319-26-7	0	0	NC	NC	DM	#N/A
flubendazole	FLB	Flubendazole	31430-15-6	0	0	NC	NC	DM	#N/A
fluconazole	FLU	Fluconazole	86386-73-4	1	0	NGC	C	DM	#N/A
fludrocortisone acetate	FCA	Fludrocortisone Acetate	514-36-3	NA	NA	U	U	DM	#N/A
fluocinolone acetonide	FLA	Fluocinolone Acetonide	67-73-2	NA	NA	U	U	DM	#N/A
fluvastatin	FST	Fluvastatin	93957-54-1	0	0	NC	NC	DM	#N/A
genistein	GEN	Genistein	446-72-0	NA	NA	U	U	DM	#N/A
gentian violet	GV	Gentian Violet	548-62-9	NA	0	U	U	DM	#N/A
glipizide	GLI	Glipizide	29094-61-9	0	NA	NC	NC	DM	#N/A
hexachlorophene	HCP	Hexachlorophene	70-30-4	0	0	NC	NC	DM	#N/A
hydrazine	HYD	Hydrazine	302-01-2	1	1	GC	C	DM	#N/A
hydrocortisone	HCO	Hydrocortisone	50-23-7	0	0	NC	NC	DM	#N/A
idebenone	IDE	Idebenone	58186-27-9	NA	NA	U	U	DM	#N/A
ifosfamide	IFO	Ifosfamide	84711-20-6	0	1	NC	NC	DM	#N/A
interleukin 1 beta, rat	IL1b	Interleukin 1 Beta, Rat		NA	NA	U	U	DM	#N/A
interleukin 6, rat	IL6	Interleukin 6, Rat		NA	NA	U	U	DM	#N/A
isoeugenol	EUG	Isoeugenol	97-54-1	0	0	NC	NC	DM	#N/A
isotretinoin	ITT	Isotretinoin	4759-48-2	1	0	NGC	C	DM	#N/A
itraconazole	ICZ	Itraconazole	84604-65-9	0	0	NC	NC	DM	#N/A
ketorolac	KR	Ketorolac	74103-06-3	0	0	NC	NC	DM	#N/A
lead (ii) acetate	L2A	Lead (Ii) Acetate	301-04-2	0	0	NC	NC	DM	#N/A
lead(iv) acetate	L4A	Lead(Iv) Acetate	546-67-8	0	1	NC	NC	DM	#N/A
leflunomide	LEF	Leflunomide	75706-12-6	0	0	NC	NC	DM	#N/A
letrozole	LTZ	Letrozole	112809-51-5	0	0	NC	NC	DM	#N/A
lipopolysaccharide e. coli o55 b5	LPSEC	Lipopolysaccharide E. Coli O55 B5		NA	NA	U	U	DM	#N/A
lomefloxacin	LFC	Lomefloxacin	98079-51-7	NA	NA	U	U	DM	#N/A
lorazepam	LAP	Lorazepam	846-49-1	0	0	NC	NC	DM	#N/A
lovastatin	LOV	Lovastatin	75330-75-5	1	0	NGC	C	DM	#N/A
mebendazole	MBD	Mebendazole	31431-39-7	0	0	NC	NC	DM	#N/A
megestrol acetate	MGA	Megestrol Acetate	595-33-5	0	0	NC	NC	DM	#N/A
mestranol	MES	Mestranol	72-33-3	NA	0	U	U	DM	#N/A
methotrexate	MTX	Methotrexate	59-05-2	0	1	NC	NC	DM	#N/A
methyl salicylate	MSA	Methyl Salicylate	119-36-8	0	NA	NC	NC	DM	#N/A
miconazole	MIC	Miconazole	22916-47-8	NA	NA	U	U	DM	#N/A
mifepristone	MIF	Mifepristone	122742-25-0	NA	NA	U	U	DM	#N/A
mitomycin c	MITc	Mitomycin C	1404-00-8	0	1	NC	NC	DM	#N/A
mln-518	MLN	Mln-518	387867-13-2	NA	NA	U	U	DM	#N/A
modafinil	MOD	Modafinil	68693-11-8	0	0	NC	NC	DM	#N/A
n-nitrosodimethylamine	DMN	N-Nitrosodimethylamine	62-75-9	1	1	GC	C	DM	#N/A
n,n-dimethylformamide	NND	N,N-Dimethylformamide	68-12-2	0	0	NC	NC	DM	#N/A
nafenopin	NAF	Nafenopin	3771-19-5	1	0	NGC	C	DM	#N/A
neomycin	NMC	Neomycin	3947-65-7	0	0	NC	NC	DM	#N/A
nimetazepam	NMZ	Nimetazepam	2011-67-8	NA	NA	U	U	DM	#N/A
nitrazepam	NZP	Nitrazepam	146-22-5	NA	NA	U	U	DM	#N/A
norethindrone	NOR	Norethindrone	68-22-4	1	NA	U	C	DM	#N/A
norethindrone acetate	NOA	Norethindrone Acetate	8015-12-1	1	NA	U	C	DM	#N/A
nystatin	NST	Nystatin	1400-61-9	NA	NA	U	U	DM	#N/A
olanzapine	OLP	Olanzapine	132539-06-1	0	0	NC	NC	DM	#N/A
oxfendazole	OXF	Oxfendazole	53716-50-0	0	0	NC	NC	DM	#N/A
oxymetazoline	OMZ	Oxymetazoline	1491-59-4	NA	NA	U	U	DM	#N/A
oxymetholone	OML	Oxymetholone	434-07-1	1	0	NGC	C	DM	#N/A
oxytetracycline	OTC	Oxytetracycline	79-57-2	0	0	NC	NC	DM	#N/A
pantoprazole	PNZ	Pantoprazole	102625-70-7	1	0	NGC	C	DM	#N/A
phenothiazine	PTZ	Phenothiazine	92-84-2	NA	0	U	U	DM	#N/A
piclamilast	PCL	Piclamilast	144035-83-6	0	NA	NC	NC	DM	#N/A
pioglitazone	PIO	Pioglitazone	111025-46-8	0	0	NC	NC	DM	#N/A
pramoxine	PRA	Pramoxine	140-65-8	NA	NA	U	U	DM	#N/A
prednisolone	PDS	Prednisolone	50-24-8	1	0	NGC	C	DM	#N/A
primidone	PRI	Primidone	125-33-7	0	0	NC	NC	DM	#N/A
procarbazine	PCZ	Procarbazine	671-16-9	0	1	NC	NC	DM	#N/A
progesterone	PGT	Progesterone	57-83-0	0	0	NC	NC	DM	#N/A
pyrogallol	PYR	Pyrogallol	87-66-1	NA	NA	U	U	DM	#N/A
rabeprazole	RAB	Rabeprazole	117976-89-3	0	1	NC	NC	DM	#N/A
raloxifene	RAX	Raloxifene	84449-90-1	0	0	NC	NC	DM	#N/A
rofecoxib	ROC	Rofecoxib	162011-90-7	0	0	NC	NC	DM	#N/A
roflumilast	ROF	Roflumilast	162401-32-3	NA	NA	U	U	DM	#N/A
rolipram	ROL	Rolipram	61413-54-5	NA	NA	U	U	DM	#N/A
roxithromycin	ROX	Roxithromycin	80214-83-1	NA	NA	U	U	DM	#N/A
safrole	SAF	Safrole	94-59-7	1	1	GC	C	DM	#N/A
salicylamide	SAC	Salicylamide	65-45-2	NA	NA	U	U	DM	#N/A
salicylic acid	SAL	Salicylic Acid	69-72-7	NA	NA	U	U	DM	#N/A
sildenafil	SIL	Sildenafil	139755-83-2	0	0	NC	NC	DM	#N/A
sodium arsenite	SAR	Sodium Arsenite	7784-46-5	0	NA	NC	NC	DM	#N/A
sotalol	SOT	Sotalol	27948-47-6	0	0	NC	NC	DM	#N/A
spironolactone	SNT	Spironolactone	52-01-7	1	0	NGC	C	DM	#N/A
stanozolol	STA	Stanozolol	10418-03-8	NA	NA	U	U	DM	#N/A
stavudine	SVD	Stavudine	3056-17-5	0	1	NC	NC	DM	#N/A
streptozotocin	SZC	Streptozotocin	18883-66-4	0	1	NC	NC	DM	#N/A
testosterone	TTR	Testosterone	571-41-5	1	0	NGC	C	DM	#N/A
thiabendazole	TBZ	Thiabendazole	148-79-8	0	0	NC	NC	DM	#N/A
thioguanine	TGN	Thioguanine	154-42-7	NA	NA	U	U	DM	#N/A
tosufloxacin	TFX	Tosufloxacin	100490-36-6	NA	NA	U	U	DM	#N/A
trichloroacetic acid	3CA	Trichloroacetic Acid	76-03-9	0	0	NC	NC	DM	#N/A
troglitazone	TGZ	Troglitazone	97322-87-7	0	0	NC	NC	DM	#N/A
tropisetron	TPS	Tropisetron	89565-68-4	0	0	NC	NC	DM	#N/A
vinblastine	VBT	Vinblastine	143-67-9	NA	NA	U	U	DM	#N/A
vinorelbine	VNB	Vinorelbine	125317-39-7	NA	NA	U	U	DM	#N/A
zileuton	ZIL	Zileuton	111406-87-2	NA	NA	U	U	DM	#N/A
zomepirac	ZOM	Zomepirac	64092-48-4	NA	NA	U	U	DM	#N/A
1% cholesterol + 0.25% sodium cholate	CH+DS-Na	1% Cholesterol + 0.25% Sodium Cholate	57-88-5	NA	NA	U	U	TGG	1
2-nitrofluorene	2NF	2-Nitrofluorene	607-57-8	1	1	GC	C	TGG	2
2,4-dinitrophenol	DNP	2,4-Dinitrophenol	51-28-5	NA	0	U	U	TGG	3
3-methylcholanthrene	3-MC	3-Methylcholanthrene	56-49-5	0	1	NC	NC	TGG	4
3-methylcholanthrene	3-MC	3-Methylcholanthrene	56-49-5	0	1	NC	NC	DM	4
acarbose	ACA	Acarbose	56180-94-0	NA	NA	NC	NC	TGG	5
acetamide	AAA	Acetamide	60-35-5	1	0	NGC	C	TGG	6
acetamidofluorene	AAF	Acetamidofluorene	53-96-3	1	1	GC	C	TGG	7
2-acetylaminofluorene	AAF	Acetamidofluorene	53-96-3	1	1	GC	C	DM	7
acetaminophen	APAP	Acetaminophen	103-90-2	1	0	NGC	C	TGG	8
acetaminophen	APAP	Acetaminophen	103-90-2	1	0	NGC	C	DM	8
acetazolamide	ACZ	Acetazolamide	59-66-5	0	NA	NC	NC	TGG	9
acetazolamide	ACZ	Acetazolamide	59-66-5	0	NA	NC	NC	DM	9
adapin	ADP	Adapin	1668-19-5	NA	NA	U	U	TGG	10
aflatoxin b1	AFB1	Aflatoxin B1	1162-65-8	1	1	GC	C	TGG	11
aflatoxin b1	AFB1	Aflatoxin B1	1162-65-8	1	1	GC	C	DM	11
ajmaline	AJM	Ajmaline	4360-12-07	NA	NA	U	U	TGG	12
allopurinol	APL	Allopurinol	315-30-0	NA	NA	NC	NC	TGG	13
allyl alcohol	AA	Allyl Alcohol	107-18-6	0	0	NC	NC	TGG	14
allyl alcohol	AA	Allyl Alcohol	107-18-6	0	0	NC	NC	DM	14
amiodarone	AM	Amiodarone	1951-25-3	NA	NA	NC	NC	TGG	15
amiodarone	AM	Amiodarone	1951-25-3	0	0	NC	NC	DM	15
amitriptyline	AMT	Amitriptyline	50-48-6	NA	NA	U	U	TGG	16
amphotericin b	AMB	Amphotericin B	1397-89-3	NA	NA	U	U	TGG	17
aspirin	ASA	Aspirin	50-78-2	0	0	NC	NC	TGG	18
aspirin	ASA	Aspirin	50-78-2	0	0	NC	NC	DM	18
azathioprine	AZP	Azathioprine	446-86-6	NA	1	NC	NC	TGG	19
azathioprine	AZP	Azathioprine	446-86-6	0	1	NC	NC	DM	19
bendazac	BDZ	Bendazac	20187-55-7	NA	NA	NC	NC	TGG	20
benzbromarone	BBr	Benzbromarone	3562-84-3	NA	NA	NC	NC	TGG	21
benziodarone	BZD	Benziodarone	68-90-6	NA	NA	NC	NC	TGG	22
bortezomib	BOR	Bortezomib	179324-69-7	NA	NA	U	U	TGG	23
bromobenzene	BBZ	Bromobenzene	108-86-1	NA	NA	U	U	TGG	24
bromoethylamine	BEA	Bromoethylamine	2576-47-8	NA	NA	NC	NC	TGG	25
bucetin	BCT	Bucetin	1083-57-4	NA	NA	U	U	TGG	26
buthionine sulfoximine	BSO	Buthionine Sulfoximine	5072-26-4	NA	NA	U	U	TGG	27
butylated hydroxyanisole	BHA	Butylated Hydroxyanisole	25013-16-5	0	0	NC	NC	TGG	28
caffeine	CAF	Caffeine	58-08-2	0	0	NC	NC	TGG	29
captopril	CAP	Captopril	62571-86-2	NA	NA	NC	NC	TGG	30
carbamazepine	CBZ	Carbamazepine	298-46-4	NA	NA	NGC	C	TGG	31
carbamazepine	CBZ	Carbamazepine	298-46-4	1	0	NGC	C	DM	31
carbon tetrachloride	CCL4	Carbon Tetrachloride	56-23-5	1	0	NGC	C	TGG	32
carbon tetrachloride	CCL4	Carbon Tetrachloride	56-23-5	1	0	NGC	C	DM	32
carboplatin	CBP	Carboplatin	41575-94-4	NA	NA	U	U	TGG	33
cephalothin	CLT	Cephalothin	153-61-7	NA	NA	NC	NC	TGG	34
chloramphenicol	CMP	Chloramphenicol	56-75-7	NA	0	NC	NC	TGG	35
chlormadinone	CLM	Chlormadinone	1961-77-9	NA	NA	NC	NC	TGG	36
chlormezanone	CMN	Chlormezanone	80-77-3	NA	NA	U	U	TGG	37
chlorpheniramine	CHL	Chlorpheniramine	132-22-9	NA	NA	U	U	TGG	38
chloroform	CHL	Chloroform	67-66-3	1	0	NGC	C	DM	38
chlorpromazine	CPZ	Chlorpromazine	50-53-3	NA	NA	NC	NC	TGG	39
chlorpropamide	CPP	Chlorpropamide	94-20-2	0	0	NC	NC	TGG	40
cimetidine	CIM	Cimetidine	51481-61-9	0	NA	NC	NC	TGG	41
ciprofloxacin	CPX	Ciprofloxacin	85721-33-1	NA	NA	NC	NC	TGG	42
cisplatin	CSP	Cisplatin	15663-27-1	NA	NA	NC	NC	TGG	43
clofibrate	CFB	Clofibrate	637-07-0	1	NA	NGC	C	TGG	44
clofibrate	CFB	Clofibrate	637-07-0	1	0	NGC	C	DM	44
clomipramine	CPM	Clomipramine	303-49-1	0	0	NC	NC	TGG	45
clomipramine	CPM	Clomipramine	303-49-1	0	0	NC	NC	DM	45
colchicine	COL	Colchicine	64-86-8	NA	NA	NC	NC	TGG	46
coumarin	CMA	Coumarin	91-64-5	1	1	GC	C	TGG	47
cycloheximide	CHX	Cycloheximide	66-81-9	NA	NA	U	U	TGG	48
cyclophosphamide	CPA	Cyclophosphamide	50-18-0	0	1	NC	NC	TGG	49
cyproterone acetate	CPA	Cyproterone Acetate	427-51-0	1	0	NGC	C	DM	49
cyclosporine a	CSA	Cyclosporine A	59865-13-3	0	0	NC	NC	TGG	50
cyclosporin a	CSA	Cyclosporine A	59865-13-3	0	0	NC	NC	DM	50
danazol	DNZ	Danazol	17230-88-5	NA	NA	NC	NC	TGG	51
danazol	DNZ	Danazol	17230-88-5	0	NA	NC	NC	DM	51
dantrolene	DTL	Dantrolene	7261-97-4	NA	NA	U	U	TGG	52
desmopressin acetate	DDAVP	Desmopressin Acetate	62288-83-9	NA	NA	U	U	TGG	53
dexamethasone	DEX	Dexamethasone	50-02-2	0	NA	NC	NC	TGG	54
dexamethasone	DEX	Dexamethasone	50-02-2	0	NA	NC	NC	DM	54
diazepam	DZP	Diazepam	439-14-5	0	0	NC	NC	TGG	55
diazepam	DZP	Diazepam	439-14-5	0	0	NC	NC	DM	55
diclofenac	DFNa	Diclofenac	15307-86-5	NA	NA	NC	NC	TGG	56
diclofenac	DFNa	Diclofenac	15307-86-5	0	0	NC	NC	DM	56
diethyl maleate	DEM	Diethyl Maleate	141-05-09	NA	NA	U	U	TGG	57
diltiazem	DIL	Diltiazem	42399-41-7	NA	NA	NC	NC	TGG	58
disopyramide	DIS	Disopyramide	3737-09-05	NA	NA	NC	NC	TGG	59
disulfiram	DSF	Disulfiram	97-77-8	0	0	NC	NC	TGG	60
doxorubicin	DOX	Doxorubicin	23214-92-8	0	1	NC	NC	TGG	61
doxorubicin	DOX	Doxorubicin	23214-92-8	0	1	NC	NC	DM	61
enalapril	ENA	Enalapril	75847-73-3	NA	NA	NC	NC	TGG	62
erythromycin ethylsuccinate	EME	Erythromycin Ethylsuccinate	1264-62-6	NA	NA	NC	NC	TGG	63
ethambutol	EBU	Ethambutol	74-55-5	NA	NA	NC	NC	TGG	64
ethanol	ETN	Ethanol	64-17-5	1	0	NGC	C	TGG	65
ethanol	ETN	Ethanol	64-17-5	1	0	NGC	C	DM	65
ethinylestradiol	EE	Ethinylestradiol	57-63-6	NA	0	NGC	C	TGG	66
ethinylestradiol	EE	Ethinylestradiol	57-63-6	1	0	NGC	C	DM	66
ethionamide	ETH	Ethionamide	536-33-4	0	0	NC	NC	TGG	67
ethionine	ET	Ethionine	13073-35-3	1	0	NGC	C	TGG	68
etoposide	ETP	Etoposide	33419-42-0	NA	NA	U	U	TGG	69
famotidine	FAM	Famotidine	76824-35-6	NA	NA	NC	NC	TGG	70
fenofibrate	FFB	Fenofibrate	49562-28-9	NA	NA	NGC	C	TGG	71
fenofibrate	FFB	Fenofibrate	49562-28-9	1	0	NGC	C	DM	71
fluoxetine hydrochloride	FLX	Fluoxetine Hydrochloride	56296-78-7	NA	NA	U	U	TGG	72
fluphenazine	FP	Fluphenazine	69-23-8	NA	NA	NC	NC	TGG	73
fluphenazine	FP	Fluphenazine	69-23-8	0	NA	NC	NC	DM	73
flutamide	FT	Flutamide	13311-84-7	NA	NA	U	U	TGG	74
furosemide	FUR	Furosemide	54-31-9	0	0	NC	NC	TGG	75
galactosamine	GaN	Galactosamine	7535-00-4	NA	NA	U	U	TGG	76
gefitinib	GEF	Gefitinib	184475-35-2	NA	NA	U	U	TGG	77
gefitinib	GEF	Gefitinib	184475-35-2	NA	NA	U	U	DM	77
gemfibrozil	GFZ	Gemfibrozil	25812-30-0	1	NA	NGC	C	TGG	78
gemfibrozil	GFZ	Gemfibrozil	25812-30-0	1	0	NGC	C	DM	78
gentamicin	GMC	Gentamicin	1403-66-3	NA	NA	NC	NC	TGG	79
gentamicin	GMC	Gentamicin	1403-66-3	0	NA	NC	NC	DM	79
glibenclamide	GBC	Glibenclamide	10238-21-8	NA	NA	NC	NC	TGG	80
griseofulvin	GF	Griseofulvin	126-07-08	NA	NA	NC	NC	TGG	81
haloperidol	HPL	Haloperidol	52-86-8	NA	NA	NC	NC	TGG	82
hexachlorobenzene	HCB	Hexachlorobenzene	118-74-1	1	0	NGC	C	TGG	83
hydroxyzine	HYZ	Hydroxyzine	68-88-2	NA	NA	U	U	TGG	84
ibuprofen	IBU	Ibuprofen	15687-27-1	0	NA	NC	NC	TGG	85
ibuprofen	IBU	Ibuprofen	15687-27-1	0	0	NC	NC	DM	85
imatinib, methanesulfonate salt	IMA	Imatinib, Methanesulfonate Salt	152459-95-5	NA	NA	U	U	TGG	86
imatinib	IMA	Imatinib	152459-95-5	0	1	NC	NC	DM	86
imipramine	IMI	Imipramine	50-49-7	NA	NA	U	U	TGG	87
indomethacin	IM	Indomethacin	53-86-1	0	0	NC	NC	TGG	88
indomethacin	IM	Indomethacin	53-86-1	0	0	NC	NC	DM	88
iproniazid	IPA	Iproniazid	54-92-2	NA	NA	NC	NC	TGG	89
isoniazid	INAH	Isoniazid	54-85-3	1	1	GC	C	TGG	90
ketoconazole	KC	Ketoconazole	65277-42-1	NA	NA	NC	NC	TGG	91
ketoconazole	KC	Ketoconazole	65277-42-1	0	0	NC	NC	DM	91
labetalol	LBT	Labetalol	36894-69-6	NA	NA	U	U	TGG	92
lomustine	LS	Lomustine	13010-47-4	NA	NA	GC	C	TGG	93
lomustine	LS	Lomustine	13010-47-4	0	1	GC	C	DM	93
lornoxicam	LNX	Lornoxicam	70374-39-9	0	NA	NC	NC	TGG	94
lps	LPS	Lps	73666-47-4	NA	NA	U	U	TGG	95
mefenamic acid	MEF	Mefenamic Acid	61-68-7	NA	NA	NC	NC	TGG	96
meloxicam	MLX	Meloxicam	71125-38-7	0	NA	NC	NC	TGG	97
meloxicam	MLX	Meloxicam	71125-38-7	0	NA	NC	NC	DM	97
metformin	MFM	Metformin	657-24-9	NA	NA	NC	NC	TGG	98
methapyrilene	MP	Methapyrilene	135-23-9	NA	NA	NGC	C	TGG	99
methapyrilene	MP	Methapyrilene	135-23-9	1	0	NGC	C	DM	99
methimazole	MTZ	Methimazole	60-56-0	0	0	NC	NC	TGG	100
methimazole	MTZ	Methimazole	60-56-0	0	0	NC	NC	DM	100
methyldopa	MDP	Methyldopa	555-30-6	NA	NA	NC	NC	TGG	101
methylene dianiline	DAPM	Methylene Dianiline	101-77-9	1	1	GC	C	TGG	102
4,4'-methylenedianiline	DAPM	Methylene Dianiline	101-77-9	1	1	GC	C	DM	102
methyltestosterone	MTS	Methyltestosterone	58-18-4	NA	NA	NC	NC	TGG	103
17-methyltestosterone	MTS	Methyltestosterone	58-18-4	0	NA	NC	NC	DM	103
mexiletine	MEX	Mexiletine	31828-71-4	NA	NA	NC	NC	TGG	104
monocrotaline	MCT	Monocrotaline	315-22-0	1	0	GC	C	TGG	105
moxisylyte	MXS	Moxisylyte	54-32-0	NA	NA	NC	NC	TGG	106
n-methyl-n-nitrosourea	MNU	N-Methyl-N-Nitrosourea	684-93-5	0	1	NC	NC	TGG	107
n-nitrosomorpholine	NMOR	N-Nitrosomorpholine	59-89-2	NA	1	U	U	TGG	108
naphthyl isothiocyanate	ANIT	Naphthyl Isothiocyanate	551-06-4	NA	NA	NC	NC	TGG	109
1-naphthyl isothiocyanate	ANIT	Naphthyl Isothiocyanate	551-06-4	0	NA	NC	NC	DM	109
naproxen	NPX	Naproxen	22204-53-1	0	0	NC	NC	TGG	110
naproxen	NPX	Naproxen	22204-53-1	0	0	NC	NC	DM	110
nicotinic acid	NIC	Nicotinic Acid	59-67-6	NA	0	NC	NC	TGG	111
nifedipine	NIF	Nifedipine	21829-25-4	NA	NA	NC	NC	TGG	112
nimesulide	NIM	Nimesulide	51803-78-2	NA	NA	U	U	TGG	113
nimesulide	NIM	Nimesulide	51803-78-2	0	NA	NC	NC	DM	113
nitrofurantoin	NFT	Nitrofurantoin	67-20-9	0	1	NC	NC	TGG	114
nitrofurazone	NFZ	Nitrofurazone	59-87-0	0	1	NC	NC	TGG	115
nitrosodiethylamine	DEN	Nitrosodiethylamine	55-18-5	1	1	GC	C	TGG	116
n-nitrosodiethylamine	DEN	Nitrosodiethylamine	55-18-5	1	1	GC	C	DM	116
omeprazole	OPZ	Omeprazole	73590-58-6	1	0	NGC	C	TGG	117
papaverine	PAP	Papaverine	58-74-2	NA	NA	U	U	TGG	118
pemoline	PML	Pemoline	18968-99-5	NA	NA	NC	NC	TGG	119
pemoline	PML	Pemoline	18968-99-5	0	NA	NC	NC	DM	119
penicillamine	PEN	Penicillamine	52-67-5	NA	NA	NC	NC	TGG	120
perhexiline	PH	Perhexiline	6621-47-2	NA	NA	NC	NC	TGG	121
phalloidin	PHA	Phalloidin	17466-45-4	NA	NA	U	U	TGG	122
phenacetin	PCT	Phenacetin	62-44-2	0	1	NC	NC	TGG	123
phenobarbital	PB	Phenobarbital	50-06-6	1	0	NGC	C	TGG	124
phenobarbital	PB	Phenobarbital	50-06-6	1	0	NGC	C	DM	124
phenylanthranilic acid	NPAA	Phenylanthranilic Acid	91-40-7	NA	NA	NC	NC	TGG	125
phenylbutazone	PhB	Phenylbutazone	50-33-9	0	0	NC	NC	TGG	126
phenytoin	PHE	Phenytoin	57-41-0	0	0	NC	NC	TGG	127
phorone	PHO	Phorone	504-20-1	NA	NA	U	U	TGG	128
promethazine	PMZ	Promethazine	60-87-7	NA	NA	U	U	TGG	129
promethazine	PMZ	Promethazine	38878-40-9	0	0	NC	NC	DM	129
propranolol	PPL	Propranolol	525-66-6	NA	NA	NC	NC	TGG	130
propylthiouracil	PTU	Propylthiouracil	51-52-5	0	0	NC	NC	TGG	131
propylthiouracil	PTU	Propylthiouracil	51-52-5	0	0	NC	NC	DM	131
puromycin aminonucleoside	PAN	Puromycin Aminonucleoside	58-60-6	NA	NA	NC	NC	TGG	132
quinidine	QND	Quinidine	56-54-2	NA	NA	NC	NC	TGG	133
ranitidine	RAN	Ranitidine	66357-35-5	NA	NA	NC	NC	TGG	134
rifampicin	RIF	Rifampicin	13292-46-1	1	0	NGC	C	TGG	135
rifabutin	RIF	Rifabutin	72559-06-9	0	0	NC	NC	DM	135
rosiglitazone maleate	RGZ	Rosiglitazone Maleate	155141-29-0	NA	NA	NC	NC	TGG	136
rosiglitazone	RGZ	Rosiglitazone Maleate	155141-29-0	0	0	NC	NC	DM	136
rotenone	ROT	Rotenone	83-79-4	0	0	NC	NC	TGG	137
simvastatin	SST	Simvastatin	79902-63-9	NA	NA	NGC	C	TGG	138
simvastatin	SST	Simvastatin	79902-63-9	1	0	NGC	C	DM	138
sulfasalazine	SS	Sulfasalazine	599-79-1	0	0	NC	NC	TGG	139
sulindac	SUL	Sulindac	38194-50-2	NA	NA	NC	NC	TGG	140
sulindac	SUL	Sulindac	38194-50-2	0	NA	NC	NC	DM	140
sulpiride	SLP	Sulpiride	15676-16-1	NA	NA	NC	NC	TGG	141
tacrine	TAC	Tacrine	321-64-2	NA	NA	U	U	TGG	142
tamoxifen	TMX	Tamoxifen	10540-29-1	1	NA	U	C	TGG	143
tamoxifen	TMX	Tamoxifen	10540-29-1	1	NA	U	C	DM	143
tannic acid	TAN	Tannic Acid	1401-55-4	0	1	NC	NC	TGG	144
terbinafine	TBF	Terbinafine	91161-71-6	NA	NA	U	U	TGG	145
tetracycline	TC	Tetracycline	60-54-8	NA	NA	NC	NC	TGG	146
theophylline	TEO	Theophylline	58-55-9	0	0	NC	NC	TGG	147
thioacetamide	TAA	Thioacetamide	62-55-5	1	0	NGC	C	TGG	148
thioacetamide	TAA	Thioacetamide	62-55-5	1	NA	NGC	C	DM	148
thioridazine	TRZ	Thioridazine	50-52-2	NA	NA	NC	NC	TGG	149
ticlopidine	TCP	Ticlopidine	55142-85-3	NA	NA	U	U	TGG	150
tiopronin	TIO	Tiopronin	1953-02-02	NA	NA	NC	NC	TGG	151
tnfa	TNF	Tnfa		NA	NA	U	U	TGG	152
tolbutamide	TLB	Tolbutamide	64-77-7	0	0	NC	NC	TGG	153
triamterene	TRI	Triamterene	396-01-0	0	0	NC	NC	TGG	154
triazolam	TZM	Triazolam	28911-01-5	NA	NA	U	U	TGG	155
trimethadione	TMD	Trimethadione	127-48-0	0	NA	NC	NC	TGG	156
tunicamycin	TUN	Tunicamycin	11089-65-9	NA	NA	U	U	TGG	157
valproic acid	VPA	Valproic Acid	99-66-1	NA	NA	NC	NC	TGG	158
valproic acid	VPA	Valproic Acid	99-66-1	0	0	NC	NC	DM	158
vitamin a	VA	Vitamin A	11103-57-4	NA	NA	NC	NC	TGG	159
wy-14643	WY	Wy-14643	50892-23-4	1	0	NGC	C	TGG	160
pirinixic acid	WY	Wy-14643	50892-23-4	1	0	NGC	C	DM	160
