# Supplementary material for: ToxDBScan: Large-Scale Similarity Screening of Toxicological Databases for Drug Candidates
Source: Int J Mol Sci. 2014 Oct 21;15(10):19037–55. doi: 10.3390/ijms151019037 (PMC4227259; doi:10.3390/ijms151019037)
Supplement: Supplementary File 1 [file ijms-15-19037-s001.zip › Table S2 TG-GATEs Compounds.xls]

## Sheet: Sheet1
Table S2. Chemicals included in TG-GATEs. Conditions for all experiments in TG-GATEs are contained, including dosage, duration of dosing, CAS number and hepatocarcinogenicity information.
Compound	Short Name	CAS	Dosage [ppm]	Duration [days]	Hepatocarcinogenicity
1% Cholesterol + 0.25% Sodium Cholate	CHDS	57-88-5		4	Unknwon
1% Cholesterol + 0.25% Sodium Cholate	CHDS	57-88-5		8	Unknwon
1% Cholesterol + 0.25% Sodium Cholate	CHDS	57-88-5		15	Unknwon
1% Cholesterol + 0.25% Sodium Cholate	CHDS	57-88-5		29	Unknwon
2-Nitrofluorene	NF	607-57-8	100	1	Genotoxic carcinogen
2-Nitrofluorene	NF	607-57-8	300	1	Genotoxic carcinogen
2-Nitrofluorene	NF	607-57-8	1000	1	Genotoxic carcinogen
2,4-Dinitrophenol	DNP	51-28-5	6	0.125	Unknwon
2,4-Dinitrophenol	DNP	51-28-5	6	0.25	Unknwon
2,4-Dinitrophenol	DNP	51-28-5	6	0.375	Unknwon
2,4-Dinitrophenol	DNP	51-28-5	6	1	Unknwon
2,4-Dinitrophenol	DNP	51-28-5	6	4	Unknwon
2,4-Dinitrophenol	DNP	51-28-5	6	8	Unknwon
2,4-Dinitrophenol	DNP	51-28-5	6	15	Unknwon
2,4-Dinitrophenol	DNP	51-28-5	6	29	Unknwon
2,4-Dinitrophenol	DNP	51-28-5	20	0.125	Unknwon
2,4-Dinitrophenol	DNP	51-28-5	20	0.25	Unknwon
2,4-Dinitrophenol	DNP	51-28-5	20	0.375	Unknwon
2,4-Dinitrophenol	DNP	51-28-5	20	1	Unknwon
2,4-Dinitrophenol	DNP	51-28-5	20	4	Unknwon
2,4-Dinitrophenol	DNP	51-28-5	20	8	Unknwon
2,4-Dinitrophenol	DNP	51-28-5	20	15	Unknwon
2,4-Dinitrophenol	DNP	51-28-5	20	29	Unknwon
2,4-Dinitrophenol	DNP	51-28-5	60	0.125	Unknwon
2,4-Dinitrophenol	DNP	51-28-5	60	0.25	Unknwon
2,4-Dinitrophenol	DNP	51-28-5	60	0.375	Unknwon
2,4-Dinitrophenol	DNP	51-28-5	60	1	Unknwon
2,4-Dinitrophenol	DNP	51-28-5	60	4	Unknwon
2,4-Dinitrophenol	DNP	51-28-5	60	8	Unknwon
2,4-Dinitrophenol	DNP	51-28-5	60	15	Unknwon
2,4-Dinitrophenol	DNP	51-28-5	60	29	Unknwon
3-Methylcholanthrene	MC	56-49-5	10	0.125	Non-hepatocarcinogen
3-Methylcholanthrene	MC	56-49-5	10	0.25	Non-hepatocarcinogen
3-Methylcholanthrene	MC	56-49-5	10	0.375	Non-hepatocarcinogen
3-Methylcholanthrene	MC	56-49-5	10	1	Non-hepatocarcinogen
3-Methylcholanthrene	MC	56-49-5	30	0.125	Non-hepatocarcinogen
3-Methylcholanthrene	MC	56-49-5	30	0.25	Non-hepatocarcinogen
3-Methylcholanthrene	MC	56-49-5	30	0.375	Non-hepatocarcinogen
3-Methylcholanthrene	MC	56-49-5	30	1	Non-hepatocarcinogen
3-Methylcholanthrene	MC	56-49-5	100	0.125	Non-hepatocarcinogen
3-Methylcholanthrene	MC	56-49-5	100	0.25	Non-hepatocarcinogen
3-Methylcholanthrene	MC	56-49-5	100	0.375	Non-hepatocarcinogen
3-Methylcholanthrene	MC	56-49-5	300	3	Non-hepatocarcinogen
Acarbose	ACA	56180-94-0	100	0.125	Non-hepatocarcinogen
Acarbose	ACA	56180-94-0	100	0.25	Non-hepatocarcinogen
Acarbose	ACA	56180-94-0	100	0.375	Non-hepatocarcinogen
Acarbose	ACA	56180-94-0	100	1	Non-hepatocarcinogen
Acarbose	ACA	56180-94-0	100	4	Non-hepatocarcinogen
Acarbose	ACA	56180-94-0	100	8	Non-hepatocarcinogen
Acarbose	ACA	56180-94-0	100	15	Non-hepatocarcinogen
Acarbose	ACA	56180-94-0	100	29	Non-hepatocarcinogen
Acarbose	ACA	56180-94-0	300	0.125	Non-hepatocarcinogen
Acarbose	ACA	56180-94-0	300	0.25	Non-hepatocarcinogen
Acarbose	ACA	56180-94-0	300	0.375	Non-hepatocarcinogen
Acarbose	ACA	56180-94-0	300	1	Non-hepatocarcinogen
Acarbose	ACA	56180-94-0	300	4	Non-hepatocarcinogen
Acarbose	ACA	56180-94-0	300	8	Non-hepatocarcinogen
Acarbose	ACA	56180-94-0	300	15	Non-hepatocarcinogen
Acarbose	ACA	56180-94-0	300	29	Non-hepatocarcinogen
Acarbose	ACA	56180-94-0	1000	0.125	Non-hepatocarcinogen
Acarbose	ACA	56180-94-0	1000	0.25	Non-hepatocarcinogen
Acarbose	ACA	56180-94-0	1000	0.375	Non-hepatocarcinogen
Acarbose	ACA	56180-94-0	1000	1	Non-hepatocarcinogen
Acarbose	ACA	56180-94-0	1000	4	Non-hepatocarcinogen
Acarbose	ACA	56180-94-0	1000	8	Non-hepatocarcinogen
Acarbose	ACA	56180-94-0	1000	15	Non-hepatocarcinogen
Acarbose	ACA	56180-94-0	1000	29	Non-hepatocarcinogen
Acetamide	AAA	60-35-5	300	4	Nongenotoxic carcinogen
Acetamide	AAA	60-35-5	300	8	Nongenotoxic carcinogen
Acetamide	AAA	60-35-5	300	15	Nongenotoxic carcinogen
Acetamide	AAA	60-35-5	300	29	Nongenotoxic carcinogen
Acetamide	AAA	60-35-5	1000	4	Nongenotoxic carcinogen
Acetamide	AAA	60-35-5	1000	8	Nongenotoxic carcinogen
Acetamide	AAA	60-35-5	1000	15	Nongenotoxic carcinogen
Acetamide	AAA	60-35-5	1000	29	Nongenotoxic carcinogen
Acetamide	AAA	60-35-5	2000	4	Nongenotoxic carcinogen
Acetamide	AAA	60-35-5	2000	8	Nongenotoxic carcinogen
Acetamide	AAA	60-35-5	2000	15	Nongenotoxic carcinogen
Acetamide	AAA	60-35-5	2000	29	Nongenotoxic carcinogen
Acetamidofluorene	AAF	53-96-3	30	3	Genotoxic carcinogen
Acetamidofluorene	AAF	53-96-3	30	4	Genotoxic carcinogen
Acetamidofluorene	AAF	53-96-3	30	8	Genotoxic carcinogen
Acetamidofluorene	AAF	53-96-3	30	15	Genotoxic carcinogen
Acetamidofluorene	AAF	53-96-3	30	29	Genotoxic carcinogen
Acetamidofluorene	AAF	53-96-3	100	0.125	Genotoxic carcinogen
Acetamidofluorene	AAF	53-96-3	100	0.25	Genotoxic carcinogen
Acetamidofluorene	AAF	53-96-3	100	0.375	Genotoxic carcinogen
Acetamidofluorene	AAF	53-96-3	100	1	Genotoxic carcinogen
Acetamidofluorene	AAF	53-96-3	100	4	Genotoxic carcinogen
Acetamidofluorene	AAF	53-96-3	100	8	Genotoxic carcinogen
Acetamidofluorene	AAF	53-96-3	100	29	Genotoxic carcinogen
Acetamidofluorene	AAF	53-96-3	300	0.125	Genotoxic carcinogen
Acetamidofluorene	AAF	53-96-3	300	0.25	Genotoxic carcinogen
Acetamidofluorene	AAF	53-96-3	300	0.375	Genotoxic carcinogen
Acetamidofluorene	AAF	53-96-3	300	1	Genotoxic carcinogen
Acetamidofluorene	AAF	53-96-3	300	4	Genotoxic carcinogen
Acetamidofluorene	AAF	53-96-3	300	8	Genotoxic carcinogen
Acetamidofluorene	AAF	53-96-3	300	15	Genotoxic carcinogen
Acetamidofluorene	AAF	53-96-3	300	29	Genotoxic carcinogen
Acetamidofluorene	AAF	53-96-3	1000	0.125	Genotoxic carcinogen
Acetamidofluorene	AAF	53-96-3	1000	0.25	Genotoxic carcinogen
Acetamidofluorene	AAF	53-96-3	1000	0.375	Genotoxic carcinogen
Acetamidofluorene	AAF	53-96-3	1000	1	Genotoxic carcinogen
Acetaminophen	APAP	103-90-2	100	5	Nongenotoxic carcinogen
Acetaminophen	APAP	103-90-2	300	0.125	Nongenotoxic carcinogen
Acetaminophen	APAP	103-90-2	300	0.25	Nongenotoxic carcinogen
Acetaminophen	APAP	103-90-2	300	0.375	Nongenotoxic carcinogen
Acetaminophen	APAP	103-90-2	300	1	Nongenotoxic carcinogen
Acetaminophen	APAP	103-90-2	300	4	Nongenotoxic carcinogen
Acetaminophen	APAP	103-90-2	300	8	Nongenotoxic carcinogen
Acetaminophen	APAP	103-90-2	300	15	Nongenotoxic carcinogen
Acetaminophen	APAP	103-90-2	300	29	Nongenotoxic carcinogen
Acetaminophen	APAP	103-90-2	600	0.125	Nongenotoxic carcinogen
Acetaminophen	APAP	103-90-2	600	0.25	Nongenotoxic carcinogen
Acetaminophen	APAP	103-90-2	600	0.375	Nongenotoxic carcinogen
Acetaminophen	APAP	103-90-2	600	1	Nongenotoxic carcinogen
Acetaminophen	APAP	103-90-2	600	4	Nongenotoxic carcinogen
Acetaminophen	APAP	103-90-2	600	8	Nongenotoxic carcinogen
Acetaminophen	APAP	103-90-2	600	15	Nongenotoxic carcinogen
Acetaminophen	APAP	103-90-2	600	29	Nongenotoxic carcinogen
Acetaminophen	APAP	103-90-2	1000	0.125	Nongenotoxic carcinogen
Acetaminophen	APAP	103-90-2	1000	0.25	Nongenotoxic carcinogen
Acetaminophen	APAP	103-90-2	1000	1	Nongenotoxic carcinogen
Acetaminophen	APAP	103-90-2	1000	4	Nongenotoxic carcinogen
Acetaminophen	APAP	103-90-2	1000	8	Nongenotoxic carcinogen
Acetaminophen	APAP	103-90-2	1000	15	Nongenotoxic carcinogen
Acetaminophen	APAP	103-90-2	1000	29	Nongenotoxic carcinogen
Acetazolamide	ACZ	59-66-5	60	0.25	Non-hepatocarcinogen
Acetazolamide	ACZ	59-66-5	60	0.375	Non-hepatocarcinogen
Acetazolamide	ACZ	59-66-5	60	1	Non-hepatocarcinogen
Acetazolamide	ACZ	59-66-5	60	4	Non-hepatocarcinogen
Acetazolamide	ACZ	59-66-5	60	8	Non-hepatocarcinogen
Acetazolamide	ACZ	59-66-5	60	15	Non-hepatocarcinogen
Acetazolamide	ACZ	59-66-5	60	29	Non-hepatocarcinogen
Acetazolamide	ACZ	59-66-5	200	0.125	Non-hepatocarcinogen
Acetazolamide	ACZ	59-66-5	200	0.25	Non-hepatocarcinogen
Acetazolamide	ACZ	59-66-5	200	0.375	Non-hepatocarcinogen
Acetazolamide	ACZ	59-66-5	200	1	Non-hepatocarcinogen
Acetazolamide	ACZ	59-66-5	200	4	Non-hepatocarcinogen
Acetazolamide	ACZ	59-66-5	200	8	Non-hepatocarcinogen
Acetazolamide	ACZ	59-66-5	200	15	Non-hepatocarcinogen
Acetazolamide	ACZ	59-66-5	200	29	Non-hepatocarcinogen
Acetazolamide	ACZ	59-66-5	250	0.25	Non-hepatocarcinogen
Acetazolamide	ACZ	59-66-5	600	0.125	Non-hepatocarcinogen
Acetazolamide	ACZ	59-66-5	600	0.25	Non-hepatocarcinogen
Acetazolamide	ACZ	59-66-5	600	0.375	Non-hepatocarcinogen
Acetazolamide	ACZ	59-66-5	600	1	Non-hepatocarcinogen
Acetazolamide	ACZ	59-66-5	600	4	Non-hepatocarcinogen
Acetazolamide	ACZ	59-66-5	600	8	Non-hepatocarcinogen
Acetazolamide	ACZ	59-66-5	600	15	Non-hepatocarcinogen
Acetazolamide	ACZ	59-66-5	600	29	Non-hepatocarcinogen
Adapin	ADP	1668-19-5	10	4	Unknwon
Adapin	ADP	1668-19-5	10	8	Unknwon
Adapin	ADP	1668-19-5	10	15	Unknwon
Adapin	ADP	1668-19-5	10	29	Unknwon
Adapin	ADP	1668-19-5	30	4	Unknwon
Adapin	ADP	1668-19-5	30	8	Unknwon
Adapin	ADP	1668-19-5	30	15	Unknwon
Adapin	ADP	1668-19-5	30	29	Unknwon
Adapin	ADP	1668-19-5	100	0.125	Unknwon
Adapin	ADP	1668-19-5	100	0.25	Unknwon
Adapin	ADP	1668-19-5	100	0.375	Unknwon
Adapin	ADP	1668-19-5	100	1	Unknwon
Adapin	ADP	1668-19-5	100	4	Unknwon
Adapin	ADP	1668-19-5	100	8	Unknwon
Adapin	ADP	1668-19-5	100	15	Unknwon
Adapin	ADP	1668-19-5	100	29	Unknwon
Adapin	ADP	1668-19-5	300	0.125	Unknwon
Adapin	ADP	1668-19-5	300	0.25	Unknwon
Adapin	ADP	1668-19-5	300	0.375	Unknwon
Adapin	ADP	1668-19-5	300	1	Unknwon
Aflatoxin B1	AFB1	1162-65-8	0.3	3	Genotoxic carcinogen
Aflatoxin B1	AFB1	1162-65-8	1	1	Genotoxic carcinogen
Aflatoxin B1	AFB1	1162-65-8	10	1	Genotoxic carcinogen
Ajmaline	AJM	4360-12-07	30	0.125	Unknwon
Ajmaline	AJM	4360-12-07	30	0.25	Unknwon
Ajmaline	AJM	4360-12-07	30	0.375	Unknwon
Ajmaline	AJM	4360-12-07	30	1	Unknwon
Ajmaline	AJM	4360-12-07	30	4	Unknwon
Ajmaline	AJM	4360-12-07	30	8	Unknwon
Ajmaline	AJM	4360-12-07	30	15	Unknwon
Ajmaline	AJM	4360-12-07	30	29	Unknwon
Ajmaline	AJM	4360-12-07	100	0.125	Unknwon
Ajmaline	AJM	4360-12-07	100	0.25	Unknwon
Ajmaline	AJM	4360-12-07	100	0.375	Unknwon
Ajmaline	AJM	4360-12-07	100	1	Unknwon
Ajmaline	AJM	4360-12-07	100	4	Unknwon
Ajmaline	AJM	4360-12-07	100	8	Unknwon
Ajmaline	AJM	4360-12-07	100	15	Unknwon
Ajmaline	AJM	4360-12-07	100	29	Unknwon
Ajmaline	AJM	4360-12-07	300	0.125	Unknwon
Ajmaline	AJM	4360-12-07	300	0.25	Unknwon
Ajmaline	AJM	4360-12-07	300	0.375	Unknwon
Ajmaline	AJM	4360-12-07	300	1	Unknwon
Ajmaline	AJM	4360-12-07	300	4	Unknwon
Ajmaline	AJM	4360-12-07	300	8	Unknwon
Ajmaline	AJM	4360-12-07	300	15	Unknwon
Ajmaline	AJM	4360-12-07	300	29	Unknwon
Allopurinol	APL	315-30-0	15	0.125	Non-hepatocarcinogen
Allopurinol	APL	315-30-0	15	0.25	Non-hepatocarcinogen
Allopurinol	APL	315-30-0	15	0.375	Non-hepatocarcinogen
Allopurinol	APL	315-30-0	15	1	Non-hepatocarcinogen
Allopurinol	APL	315-30-0	15	4	Non-hepatocarcinogen
Allopurinol	APL	315-30-0	15	8	Non-hepatocarcinogen
Allopurinol	APL	315-30-0	15	15	Non-hepatocarcinogen
Allopurinol	APL	315-30-0	15	29	Non-hepatocarcinogen
Allopurinol	APL	315-30-0	50	0.125	Non-hepatocarcinogen
Allopurinol	APL	315-30-0	50	0.25	Non-hepatocarcinogen
Allopurinol	APL	315-30-0	50	0.375	Non-hepatocarcinogen
Allopurinol	APL	315-30-0	50	1	Non-hepatocarcinogen
Allopurinol	APL	315-30-0	50	4	Non-hepatocarcinogen
Allopurinol	APL	315-30-0	50	8	Non-hepatocarcinogen
Allopurinol	APL	315-30-0	50	15	Non-hepatocarcinogen
Allopurinol	APL	315-30-0	50	29	Non-hepatocarcinogen
Allopurinol	APL	315-30-0	150	0.125	Non-hepatocarcinogen
Allopurinol	APL	315-30-0	150	0.25	Non-hepatocarcinogen
Allopurinol	APL	315-30-0	150	0.375	Non-hepatocarcinogen
Allopurinol	APL	315-30-0	150	1	Non-hepatocarcinogen
Allopurinol	APL	315-30-0	150	4	Non-hepatocarcinogen
Allopurinol	APL	315-30-0	150	8	Non-hepatocarcinogen
Allopurinol	APL	315-30-0	150	15	Non-hepatocarcinogen
Allopurinol	APL	315-30-0	150	29	Non-hepatocarcinogen
Allyl Alcohol	AA	107-18-6	3	15	Non-hepatocarcinogen
Allyl Alcohol	AA	107-18-6	10	0.125	Non-hepatocarcinogen
Allyl Alcohol	AA	107-18-6	10	0.25	Non-hepatocarcinogen
Allyl Alcohol	AA	107-18-6	10	0.375	Non-hepatocarcinogen
Allyl Alcohol	AA	107-18-6	10	8	Non-hepatocarcinogen
Allyl Alcohol	AA	107-18-6	10	15	Non-hepatocarcinogen
Allyl Alcohol	AA	107-18-6	16	0.25	Non-hepatocarcinogen
Allyl Alcohol	AA	107-18-6	16	1	Non-hepatocarcinogen
Allyl Alcohol	AA	107-18-6	16	3	Non-hepatocarcinogen
Allyl Alcohol	AA	107-18-6	16	7	Non-hepatocarcinogen
Allyl Alcohol	AA	107-18-6	25	1	Non-hepatocarcinogen
Allyl Alcohol	AA	107-18-6	25	3	Non-hepatocarcinogen
Allyl Alcohol	AA	107-18-6	25	7	Non-hepatocarcinogen
Allyl Alcohol	AA	107-18-6	30	0.125	Non-hepatocarcinogen
Allyl Alcohol	AA	107-18-6	30	0.25	Non-hepatocarcinogen
Allyl Alcohol	AA	107-18-6	30	0.375	Non-hepatocarcinogen
Allyl Alcohol	AA	107-18-6	30	1	Non-hepatocarcinogen
Allyl Alcohol	AA	107-18-6	30	4	Non-hepatocarcinogen
Allyl Alcohol	AA	107-18-6	30	8	Non-hepatocarcinogen
Allyl Alcohol	AA	107-18-6	30	15	Non-hepatocarcinogen
Allyl Alcohol	AA	107-18-6	30	29	Non-hepatocarcinogen
Allyl Alcohol	AA	107-18-6	32	1	Non-hepatocarcinogen
Allyl Alcohol	AA	107-18-6	32	3	Non-hepatocarcinogen
Allyl Alcohol	AA	107-18-6	32	5	Non-hepatocarcinogen
Amiodarone	AM	1951-25-3	20	4	Non-hepatocarcinogen
Amiodarone	AM	1951-25-3	20	8	Non-hepatocarcinogen
Amiodarone	AM	1951-25-3	20	29	Non-hepatocarcinogen
Amiodarone	AM	1951-25-3	60	8	Non-hepatocarcinogen
Amiodarone	AM	1951-25-3	60	15	Non-hepatocarcinogen
Amiodarone	AM	1951-25-3	60	29	Non-hepatocarcinogen
Amiodarone	AM	1951-25-3	147	3	Non-hepatocarcinogen
Amiodarone	AM	1951-25-3	147	5	Non-hepatocarcinogen
Amiodarone	AM	1951-25-3	200	0.125	Non-hepatocarcinogen
Amiodarone	AM	1951-25-3	200	0.25	Non-hepatocarcinogen
Amiodarone	AM	1951-25-3	200	0.375	Non-hepatocarcinogen
Amiodarone	AM	1951-25-3	200	1	Non-hepatocarcinogen
Amiodarone	AM	1951-25-3	200	4	Non-hepatocarcinogen
Amiodarone	AM	1951-25-3	200	8	Non-hepatocarcinogen
Amiodarone	AM	1951-25-3	200	15	Non-hepatocarcinogen
Amiodarone	AM	1951-25-3	200	29	Non-hepatocarcinogen
Amiodarone	AM	1951-25-3	600	0.125	Non-hepatocarcinogen
Amiodarone	AM	1951-25-3	600	0.25	Non-hepatocarcinogen
Amiodarone	AM	1951-25-3	600	0.375	Non-hepatocarcinogen
Amiodarone	AM	1951-25-3	600	1	Non-hepatocarcinogen
Amiodarone	AM	1951-25-3	2000	0.125	Non-hepatocarcinogen
Amiodarone	AM	1951-25-3	2000	0.25	Non-hepatocarcinogen
Amiodarone	AM	1951-25-3	2000	0.375	Non-hepatocarcinogen
Amiodarone	AM	1951-25-3	2000	1	Non-hepatocarcinogen
Amitriptyline	AMT	50-48-6	15	0.125	Unknwon
Amitriptyline	AMT	50-48-6	15	0.25	Unknwon
Amitriptyline	AMT	50-48-6	15	0.375	Unknwon
Amitriptyline	AMT	50-48-6	15	1	Unknwon
Amitriptyline	AMT	50-48-6	15	4	Unknwon
Amitriptyline	AMT	50-48-6	15	8	Unknwon
Amitriptyline	AMT	50-48-6	15	15	Unknwon
Amitriptyline	AMT	50-48-6	15	29	Unknwon
Amitriptyline	AMT	50-48-6	50	0.125	Unknwon
Amitriptyline	AMT	50-48-6	50	0.25	Unknwon
Amitriptyline	AMT	50-48-6	50	0.375	Unknwon
Amitriptyline	AMT	50-48-6	50	1	Unknwon
Amitriptyline	AMT	50-48-6	50	4	Unknwon
Amitriptyline	AMT	50-48-6	50	8	Unknwon
Amitriptyline	AMT	50-48-6	50	15	Unknwon
Amitriptyline	AMT	50-48-6	50	29	Unknwon
Amitriptyline	AMT	50-48-6	150	0.125	Unknwon
Amitriptyline	AMT	50-48-6	150	0.25	Unknwon
Amitriptyline	AMT	50-48-6	150	0.375	Unknwon
Amitriptyline	AMT	50-48-6	150	1	Unknwon
Amitriptyline	AMT	50-48-6	150	4	Unknwon
Amitriptyline	AMT	50-48-6	150	8	Unknwon
Amitriptyline	AMT	50-48-6	150	15	Unknwon
Amitriptyline	AMT	50-48-6	150	29	Unknwon
Amphotericin B	AMB	1397-89-3	0.1	4	Unknwon
Amphotericin B	AMB	1397-89-3	0.1	8	Unknwon
Amphotericin B	AMB	1397-89-3	0.1	15	Unknwon
Amphotericin B	AMB	1397-89-3	0.1	29	Unknwon
Amphotericin B	AMB	1397-89-3	0.3	4	Unknwon
Amphotericin B	AMB	1397-89-3	0.3	8	Unknwon
Amphotericin B	AMB	1397-89-3	0.3	15	Unknwon
Amphotericin B	AMB	1397-89-3	0.3	29	Unknwon
Amphotericin B	AMB	1397-89-3	0.6	0.125	Unknwon
Amphotericin B	AMB	1397-89-3	0.6	0.25	Unknwon
Amphotericin B	AMB	1397-89-3	0.6	0.375	Unknwon
Amphotericin B	AMB	1397-89-3	0.6	1	Unknwon
Amphotericin B	AMB	1397-89-3	1	4	Unknwon
Amphotericin B	AMB	1397-89-3	1	8	Unknwon
Amphotericin B	AMB	1397-89-3	1	15	Unknwon
Amphotericin B	AMB	1397-89-3	1	29	Unknwon
Amphotericin B	AMB	1397-89-3	2	0.25	Unknwon
Amphotericin B	AMB	1397-89-3	2	0.375	Unknwon
Amphotericin B	AMB	1397-89-3	2	1	Unknwon
Aspirin	ASA	50-78-2	35	0.25	Non-hepatocarcinogen
Aspirin	ASA	50-78-2	35	1	Non-hepatocarcinogen
Aspirin	ASA	50-78-2	35	5	Non-hepatocarcinogen
Aspirin	ASA	50-78-2	45	4	Non-hepatocarcinogen
Aspirin	ASA	50-78-2	45	8	Non-hepatocarcinogen
Aspirin	ASA	50-78-2	45	15	Non-hepatocarcinogen
Aspirin	ASA	50-78-2	45	29	Non-hepatocarcinogen
Aspirin	ASA	50-78-2	150	15	Non-hepatocarcinogen
Aspirin	ASA	50-78-2	167	3	Non-hepatocarcinogen
Aspirin	ASA	50-78-2	375	0.25	Non-hepatocarcinogen
Aspirin	ASA	50-78-2	375	5	Non-hepatocarcinogen
Aspirin	ASA	50-78-2	450	0.25	Non-hepatocarcinogen
Aspirin	ASA	50-78-2	450	0.375	Non-hepatocarcinogen
Aspirin	ASA	50-78-2	450	1	Non-hepatocarcinogen
Aspirin	ASA	50-78-2	450	4	Non-hepatocarcinogen
Aspirin	ASA	50-78-2	450	8	Non-hepatocarcinogen
Aspirin	ASA	50-78-2	450	29	Non-hepatocarcinogen
Aspirin	ASA	50-78-2	1000	0.125	Non-hepatocarcinogen
Aspirin	ASA	50-78-2	1000	0.375	Non-hepatocarcinogen
Aspirin	ASA	50-78-2	1000	1	Non-hepatocarcinogen
Aspirin	ASA	50-78-2	2000	0.125	Non-hepatocarcinogen
Aspirin	ASA	50-78-2	2000	0.25	Non-hepatocarcinogen
Aspirin	ASA	50-78-2	2000	0.375	Non-hepatocarcinogen
Aspirin	ASA	50-78-2	2000	1	Non-hepatocarcinogen
Azathioprine	AZP	446-86-6	3	0.125	Non-hepatocarcinogen
Azathioprine	AZP	446-86-6	3	0.25	Non-hepatocarcinogen
Azathioprine	AZP	446-86-6	3	1	Non-hepatocarcinogen
Azathioprine	AZP	446-86-6	3	8	Non-hepatocarcinogen
Azathioprine	AZP	446-86-6	3	15	Non-hepatocarcinogen
Azathioprine	AZP	446-86-6	3	29	Non-hepatocarcinogen
Azathioprine	AZP	446-86-6	10	0.125	Non-hepatocarcinogen
Azathioprine	AZP	446-86-6	10	0.25	Non-hepatocarcinogen
Azathioprine	AZP	446-86-6	10	0.375	Non-hepatocarcinogen
Azathioprine	AZP	446-86-6	10	4	Non-hepatocarcinogen
Azathioprine	AZP	446-86-6	10	15	Non-hepatocarcinogen
Azathioprine	AZP	446-86-6	10	29	Non-hepatocarcinogen
Azathioprine	AZP	446-86-6	20	3	Non-hepatocarcinogen
Azathioprine	AZP	446-86-6	30	0.125	Non-hepatocarcinogen
Azathioprine	AZP	446-86-6	30	0.25	Non-hepatocarcinogen
Azathioprine	AZP	446-86-6	30	0.375	Non-hepatocarcinogen
Azathioprine	AZP	446-86-6	30	1	Non-hepatocarcinogen
Azathioprine	AZP	446-86-6	30	4	Non-hepatocarcinogen
Azathioprine	AZP	446-86-6	30	8	Non-hepatocarcinogen
Azathioprine	AZP	446-86-6	30	15	Non-hepatocarcinogen
Azathioprine	AZP	446-86-6	30	29	Non-hepatocarcinogen
Azathioprine	AZP	446-86-6	54	3	Non-hepatocarcinogen
Azathioprine	AZP	446-86-6	54	5	Non-hepatocarcinogen
Azathioprine	AZP	446-86-6	160	3	Non-hepatocarcinogen
Bendazac	BDZ	20187-55-7	30	4	Non-hepatocarcinogen
Bendazac	BDZ	20187-55-7	30	8	Non-hepatocarcinogen
Bendazac	BDZ	20187-55-7	30	15	Non-hepatocarcinogen
Bendazac	BDZ	20187-55-7	30	29	Non-hepatocarcinogen
Bendazac	BDZ	20187-55-7	100	0.125	Non-hepatocarcinogen
Bendazac	BDZ	20187-55-7	100	0.25	Non-hepatocarcinogen
Bendazac	BDZ	20187-55-7	100	0.375	Non-hepatocarcinogen
Bendazac	BDZ	20187-55-7	100	1	Non-hepatocarcinogen
Bendazac	BDZ	20187-55-7	100	4	Non-hepatocarcinogen
Bendazac	BDZ	20187-55-7	100	8	Non-hepatocarcinogen
Bendazac	BDZ	20187-55-7	100	15	Non-hepatocarcinogen
Bendazac	BDZ	20187-55-7	100	29	Non-hepatocarcinogen
Bendazac	BDZ	20187-55-7	300	0.125	Non-hepatocarcinogen
Bendazac	BDZ	20187-55-7	300	0.25	Non-hepatocarcinogen
Bendazac	BDZ	20187-55-7	300	0.375	Non-hepatocarcinogen
Bendazac	BDZ	20187-55-7	300	1	Non-hepatocarcinogen
Bendazac	BDZ	20187-55-7	300	4	Non-hepatocarcinogen
Bendazac	BDZ	20187-55-7	300	8	Non-hepatocarcinogen
Bendazac	BDZ	20187-55-7	300	15	Non-hepatocarcinogen
Bendazac	BDZ	20187-55-7	300	29	Non-hepatocarcinogen
Bendazac	BDZ	20187-55-7	1000	0.125	Non-hepatocarcinogen
Bendazac	BDZ	20187-55-7	1000	0.25	Non-hepatocarcinogen
Bendazac	BDZ	20187-55-7	1000	0.375	Non-hepatocarcinogen
Bendazac	BDZ	20187-55-7	1000	1	Non-hepatocarcinogen
Benzbromarone	BBr	3562-84-3	20	0.125	Non-hepatocarcinogen
Benzbromarone	BBr	3562-84-3	20	0.25	Non-hepatocarcinogen
Benzbromarone	BBr	3562-84-3	20	0.375	Non-hepatocarcinogen
Benzbromarone	BBr	3562-84-3	20	1	Non-hepatocarcinogen
Benzbromarone	BBr	3562-84-3	20	4	Non-hepatocarcinogen
Benzbromarone	BBr	3562-84-3	20	8	Non-hepatocarcinogen
Benzbromarone	BBr	3562-84-3	20	15	Non-hepatocarcinogen
Benzbromarone	BBr	3562-84-3	20	29	Non-hepatocarcinogen
Benzbromarone	BBr	3562-84-3	60	0.125	Non-hepatocarcinogen
Benzbromarone	BBr	3562-84-3	60	0.25	Non-hepatocarcinogen
Benzbromarone	BBr	3562-84-3	60	0.375	Non-hepatocarcinogen
Benzbromarone	BBr	3562-84-3	60	1	Non-hepatocarcinogen
Benzbromarone	BBr	3562-84-3	60	4	Non-hepatocarcinogen
Benzbromarone	BBr	3562-84-3	60	8	Non-hepatocarcinogen
Benzbromarone	BBr	3562-84-3	60	15	Non-hepatocarcinogen
Benzbromarone	BBr	3562-84-3	60	29	Non-hepatocarcinogen
Benzbromarone	BBr	3562-84-3	200	0.125	Non-hepatocarcinogen
Benzbromarone	BBr	3562-84-3	200	0.25	Non-hepatocarcinogen
Benzbromarone	BBr	3562-84-3	200	0.375	Non-hepatocarcinogen
Benzbromarone	BBr	3562-84-3	200	1	Non-hepatocarcinogen
Benzbromarone	BBr	3562-84-3	200	4	Non-hepatocarcinogen
Benzbromarone	BBr	3562-84-3	200	8	Non-hepatocarcinogen
Benzbromarone	BBr	3562-84-3	200	15	Non-hepatocarcinogen
Benzbromarone	BBr	3562-84-3	200	29	Non-hepatocarcinogen
Benziodarone	BZD	68-90-6	30	0.125	Non-hepatocarcinogen
Benziodarone	BZD	68-90-6	30	0.25	Non-hepatocarcinogen
Benziodarone	BZD	68-90-6	30	0.375	Non-hepatocarcinogen
Benziodarone	BZD	68-90-6	30	1	Non-hepatocarcinogen
Benziodarone	BZD	68-90-6	30	4	Non-hepatocarcinogen
Benziodarone	BZD	68-90-6	30	8	Non-hepatocarcinogen
Benziodarone	BZD	68-90-6	30	15	Non-hepatocarcinogen
Benziodarone	BZD	68-90-6	30	29	Non-hepatocarcinogen
Benziodarone	BZD	68-90-6	100	0.125	Non-hepatocarcinogen
Benziodarone	BZD	68-90-6	100	0.25	Non-hepatocarcinogen
Benziodarone	BZD	68-90-6	100	0.375	Non-hepatocarcinogen
Benziodarone	BZD	68-90-6	100	1	Non-hepatocarcinogen
Benziodarone	BZD	68-90-6	100	4	Non-hepatocarcinogen
Benziodarone	BZD	68-90-6	100	8	Non-hepatocarcinogen
Benziodarone	BZD	68-90-6	100	15	Non-hepatocarcinogen
Benziodarone	BZD	68-90-6	100	29	Non-hepatocarcinogen
Benziodarone	BZD	68-90-6	300	0.125	Non-hepatocarcinogen
Benziodarone	BZD	68-90-6	300	0.25	Non-hepatocarcinogen
Benziodarone	BZD	68-90-6	300	0.375	Non-hepatocarcinogen
Benziodarone	BZD	68-90-6	300	1	Non-hepatocarcinogen
Benziodarone	BZD	68-90-6	300	4	Non-hepatocarcinogen
Benziodarone	BZD	68-90-6	300	8	Non-hepatocarcinogen
Benziodarone	BZD	68-90-6	300	15	Non-hepatocarcinogen
Benziodarone	BZD	68-90-6	300	29	Non-hepatocarcinogen
Bortezomib	BOR	179324-69-7	0.1	0.125	Unknwon
Bortezomib	BOR	179324-69-7	0.1	0.25	Unknwon
Bortezomib	BOR	179324-69-7	0.1	0.375	Unknwon
Bortezomib	BOR	179324-69-7	0.1	1	Unknwon
Bortezomib	BOR	179324-69-7	0.3	0.125	Unknwon
Bortezomib	BOR	179324-69-7	0.3	0.25	Unknwon
Bortezomib	BOR	179324-69-7	0.3	0.375	Unknwon
Bortezomib	BOR	179324-69-7	0.3	1	Unknwon
Bortezomib	BOR	179324-69-7	0.6	0.125	Unknwon
Bortezomib	BOR	179324-69-7	0.6	0.25	Unknwon
Bortezomib	BOR	179324-69-7	0.6	0.375	Unknwon
Bortezomib	BOR	179324-69-7	0.6	1	Unknwon
Bromobenzene	BBZ	108-86-1	30	0.125	Unknwon
Bromobenzene	BBZ	108-86-1	30	0.25	Unknwon
Bromobenzene	BBZ	108-86-1	30	0.375	Unknwon
Bromobenzene	BBZ	108-86-1	30	1	Unknwon
Bromobenzene	BBZ	108-86-1	30	4	Unknwon
Bromobenzene	BBZ	108-86-1	30	8	Unknwon
Bromobenzene	BBZ	108-86-1	30	15	Unknwon
Bromobenzene	BBZ	108-86-1	30	29	Unknwon
Bromobenzene	BBZ	108-86-1	100	0.125	Unknwon
Bromobenzene	BBZ	108-86-1	100	0.25	Unknwon
Bromobenzene	BBZ	108-86-1	100	0.375	Unknwon
Bromobenzene	BBZ	108-86-1	100	1	Unknwon
Bromobenzene	BBZ	108-86-1	100	4	Unknwon
Bromobenzene	BBZ	108-86-1	100	8	Unknwon
Bromobenzene	BBZ	108-86-1	100	15	Unknwon
Bromobenzene	BBZ	108-86-1	100	29	Unknwon
Bromobenzene	BBZ	108-86-1	300	0.125	Unknwon
Bromobenzene	BBZ	108-86-1	300	0.25	Unknwon
Bromobenzene	BBZ	108-86-1	300	0.375	Unknwon
Bromobenzene	BBZ	108-86-1	300	1	Unknwon
Bromobenzene	BBZ	108-86-1	300	4	Unknwon
Bromobenzene	BBZ	108-86-1	300	8	Unknwon
Bromobenzene	BBZ	108-86-1	300	15	Unknwon
Bromobenzene	BBZ	108-86-1	300	29	Unknwon
Bromoethylamine	BEA	2576-47-8	2	4	Non-hepatocarcinogen
Bromoethylamine	BEA	2576-47-8	2	8	Non-hepatocarcinogen
Bromoethylamine	BEA	2576-47-8	2	15	Non-hepatocarcinogen
Bromoethylamine	BEA	2576-47-8	2	29	Non-hepatocarcinogen
Bromoethylamine	BEA	2576-47-8	6	0.125	Non-hepatocarcinogen
Bromoethylamine	BEA	2576-47-8	6	0.25	Non-hepatocarcinogen
Bromoethylamine	BEA	2576-47-8	6	0.375	Non-hepatocarcinogen
Bromoethylamine	BEA	2576-47-8	6	1	Non-hepatocarcinogen
Bromoethylamine	BEA	2576-47-8	6	4	Non-hepatocarcinogen
Bromoethylamine	BEA	2576-47-8	6	8	Non-hepatocarcinogen
Bromoethylamine	BEA	2576-47-8	6	15	Non-hepatocarcinogen
Bromoethylamine	BEA	2576-47-8	6	29	Non-hepatocarcinogen
Bromoethylamine	BEA	2576-47-8	20	0.125	Non-hepatocarcinogen
Bromoethylamine	BEA	2576-47-8	20	0.25	Non-hepatocarcinogen
Bromoethylamine	BEA	2576-47-8	20	0.375	Non-hepatocarcinogen
Bromoethylamine	BEA	2576-47-8	20	1	Non-hepatocarcinogen
Bromoethylamine	BEA	2576-47-8	20	4	Non-hepatocarcinogen
Bromoethylamine	BEA	2576-47-8	20	8	Non-hepatocarcinogen
Bromoethylamine	BEA	2576-47-8	20	15	Non-hepatocarcinogen
Bromoethylamine	BEA	2576-47-8	20	29	Non-hepatocarcinogen
Bromoethylamine	BEA	2576-47-8	60	0.125	Non-hepatocarcinogen
Bromoethylamine	BEA	2576-47-8	60	0.25	Non-hepatocarcinogen
Bromoethylamine	BEA	2576-47-8	60	0.375	Non-hepatocarcinogen
Bromoethylamine	BEA	2576-47-8	60	1	Non-hepatocarcinogen
Bucetin	BCT	1083-57-4	100	4	Unknwon
Bucetin	BCT	1083-57-4	100	8	Unknwon
Bucetin	BCT	1083-57-4	100	15	Unknwon
Bucetin	BCT	1083-57-4	100	29	Unknwon
Bucetin	BCT	1083-57-4	300	0.125	Unknwon
Bucetin	BCT	1083-57-4	300	0.25	Unknwon
Bucetin	BCT	1083-57-4	300	0.375	Unknwon
Bucetin	BCT	1083-57-4	300	1	Unknwon
Bucetin	BCT	1083-57-4	300	4	Unknwon
Bucetin	BCT	1083-57-4	300	8	Unknwon
Bucetin	BCT	1083-57-4	300	15	Unknwon
Bucetin	BCT	1083-57-4	300	29	Unknwon
Bucetin	BCT	1083-57-4	1000	0.125	Unknwon
Bucetin	BCT	1083-57-4	1000	0.25	Unknwon
Bucetin	BCT	1083-57-4	1000	0.375	Unknwon
Bucetin	BCT	1083-57-4	1000	1	Unknwon
Bucetin	BCT	1083-57-4	1000	4	Unknwon
Bucetin	BCT	1083-57-4	1000	8	Unknwon
Bucetin	BCT	1083-57-4	1000	15	Unknwon
Bucetin	BCT	1083-57-4	1000	29	Unknwon
Bucetin	BCT	1083-57-4	2000	0.125	Unknwon
Bucetin	BCT	1083-57-4	2000	0.25	Unknwon
Bucetin	BCT	1083-57-4	2000	0.375	Unknwon
Bucetin	BCT	1083-57-4	2000	1	Unknwon
Buthionine Sulfoximine	BSO	5072-26-4	150	0.125	Unknwon
Buthionine Sulfoximine	BSO	5072-26-4	150	0.25	Unknwon
Buthionine Sulfoximine	BSO	5072-26-4	150	0.375	Unknwon
Buthionine Sulfoximine	BSO	5072-26-4	150	1	Unknwon
Buthionine Sulfoximine	BSO	5072-26-4	450	0.125	Unknwon
Buthionine Sulfoximine	BSO	5072-26-4	450	0.25	Unknwon
Buthionine Sulfoximine	BSO	5072-26-4	450	0.375	Unknwon
Buthionine Sulfoximine	BSO	5072-26-4	450	1	Unknwon
Buthionine Sulfoximine	BSO	5072-26-4	1500	0.125	Unknwon
Buthionine Sulfoximine	BSO	5072-26-4	1500	0.25	Unknwon
Buthionine Sulfoximine	BSO	5072-26-4	1500	0.375	Unknwon
Buthionine Sulfoximine	BSO	5072-26-4	1500	1	Unknwon
Butylated Hydroxyanisole	BHA	25013-16-5	300	0.125	Non-hepatocarcinogen
Butylated Hydroxyanisole	BHA	25013-16-5	300	0.25	Non-hepatocarcinogen
Butylated Hydroxyanisole	BHA	25013-16-5	300	0.375	Non-hepatocarcinogen
Butylated Hydroxyanisole	BHA	25013-16-5	300	1	Non-hepatocarcinogen
Butylated Hydroxyanisole	BHA	25013-16-5	300	4	Non-hepatocarcinogen
Butylated Hydroxyanisole	BHA	25013-16-5	300	8	Non-hepatocarcinogen
Butylated Hydroxyanisole	BHA	25013-16-5	300	15	Non-hepatocarcinogen
Butylated Hydroxyanisole	BHA	25013-16-5	300	29	Non-hepatocarcinogen
Butylated Hydroxyanisole	BHA	25013-16-5	1000	0.125	Non-hepatocarcinogen
Butylated Hydroxyanisole	BHA	25013-16-5	1000	0.25	Non-hepatocarcinogen
Butylated Hydroxyanisole	BHA	25013-16-5	1000	0.375	Non-hepatocarcinogen
Butylated Hydroxyanisole	BHA	25013-16-5	1000	1	Non-hepatocarcinogen
Butylated Hydroxyanisole	BHA	25013-16-5	1000	4	Non-hepatocarcinogen
Butylated Hydroxyanisole	BHA	25013-16-5	1000	8	Non-hepatocarcinogen
Butylated Hydroxyanisole	BHA	25013-16-5	1000	15	Non-hepatocarcinogen
Butylated Hydroxyanisole	BHA	25013-16-5	1000	29	Non-hepatocarcinogen
Butylated Hydroxyanisole	BHA	25013-16-5	2000	0.125	Non-hepatocarcinogen
Butylated Hydroxyanisole	BHA	25013-16-5	2000	0.25	Non-hepatocarcinogen
Butylated Hydroxyanisole	BHA	25013-16-5	2000	0.375	Non-hepatocarcinogen
Butylated Hydroxyanisole	BHA	25013-16-5	2000	1	Non-hepatocarcinogen
Butylated Hydroxyanisole	BHA	25013-16-5	2000	4	Non-hepatocarcinogen
Butylated Hydroxyanisole	BHA	25013-16-5	2000	8	Non-hepatocarcinogen
Butylated Hydroxyanisole	BHA	25013-16-5	2000	15	Non-hepatocarcinogen
Butylated Hydroxyanisole	BHA	25013-16-5	2000	29	Non-hepatocarcinogen
Caffeine	CAF	58-08-2	10	0.125	Non-hepatocarcinogen
Caffeine	CAF	58-08-2	10	0.25	Non-hepatocarcinogen
Caffeine	CAF	58-08-2	10	0.375	Non-hepatocarcinogen
Caffeine	CAF	58-08-2	10	1	Non-hepatocarcinogen
Caffeine	CAF	58-08-2	10	4	Non-hepatocarcinogen
Caffeine	CAF	58-08-2	10	8	Non-hepatocarcinogen
Caffeine	CAF	58-08-2	10	15	Non-hepatocarcinogen
Caffeine	CAF	58-08-2	10	29	Non-hepatocarcinogen
Caffeine	CAF	58-08-2	30	0.125	Non-hepatocarcinogen
Caffeine	CAF	58-08-2	30	0.25	Non-hepatocarcinogen
Caffeine	CAF	58-08-2	30	0.375	Non-hepatocarcinogen
Caffeine	CAF	58-08-2	30	1	Non-hepatocarcinogen
Caffeine	CAF	58-08-2	30	4	Non-hepatocarcinogen
Caffeine	CAF	58-08-2	30	8	Non-hepatocarcinogen
Caffeine	CAF	58-08-2	30	15	Non-hepatocarcinogen
Caffeine	CAF	58-08-2	30	29	Non-hepatocarcinogen
Caffeine	CAF	58-08-2	100	0.125	Non-hepatocarcinogen
Caffeine	CAF	58-08-2	100	0.25	Non-hepatocarcinogen
Caffeine	CAF	58-08-2	100	0.375	Non-hepatocarcinogen
Caffeine	CAF	58-08-2	100	1	Non-hepatocarcinogen
Caffeine	CAF	58-08-2	100	4	Non-hepatocarcinogen
Caffeine	CAF	58-08-2	100	8	Non-hepatocarcinogen
Caffeine	CAF	58-08-2	100	15	Non-hepatocarcinogen
Caffeine	CAF	58-08-2	100	29	Non-hepatocarcinogen
Captopril	CAP	62571-86-2	100	0.125	Non-hepatocarcinogen
Captopril	CAP	62571-86-2	100	0.25	Non-hepatocarcinogen
Captopril	CAP	62571-86-2	100	0.375	Non-hepatocarcinogen
Captopril	CAP	62571-86-2	100	1	Non-hepatocarcinogen
Captopril	CAP	62571-86-2	100	4	Non-hepatocarcinogen
Captopril	CAP	62571-86-2	100	8	Non-hepatocarcinogen
Captopril	CAP	62571-86-2	100	15	Non-hepatocarcinogen
Captopril	CAP	62571-86-2	100	29	Non-hepatocarcinogen
Captopril	CAP	62571-86-2	300	0.125	Non-hepatocarcinogen
Captopril	CAP	62571-86-2	300	0.25	Non-hepatocarcinogen
Captopril	CAP	62571-86-2	300	0.375	Non-hepatocarcinogen
Captopril	CAP	62571-86-2	300	1	Non-hepatocarcinogen
Captopril	CAP	62571-86-2	300	4	Non-hepatocarcinogen
Captopril	CAP	62571-86-2	300	8	Non-hepatocarcinogen
Captopril	CAP	62571-86-2	300	15	Non-hepatocarcinogen
Captopril	CAP	62571-86-2	300	29	Non-hepatocarcinogen
Captopril	CAP	62571-86-2	1000	0.125	Non-hepatocarcinogen
Captopril	CAP	62571-86-2	1000	0.25	Non-hepatocarcinogen
Captopril	CAP	62571-86-2	1000	0.375	Non-hepatocarcinogen
Captopril	CAP	62571-86-2	1000	1	Non-hepatocarcinogen
Captopril	CAP	62571-86-2	1000	4	Non-hepatocarcinogen
Captopril	CAP	62571-86-2	1000	8	Non-hepatocarcinogen
Captopril	CAP	62571-86-2	1000	15	Non-hepatocarcinogen
Captopril	CAP	62571-86-2	1000	29	Non-hepatocarcinogen
Carbamazepine	CBZ	298-46-4	30	0.125	Nongenotoxic carcinogen
Carbamazepine	CBZ	298-46-4	30	0.375	Nongenotoxic carcinogen
Carbamazepine	CBZ	298-46-4	30	4	Nongenotoxic carcinogen
Carbamazepine	CBZ	298-46-4	30	15	Nongenotoxic carcinogen
Carbamazepine	CBZ	298-46-4	30	29	Nongenotoxic carcinogen
Carbamazepine	CBZ	298-46-4	100	0.125	Nongenotoxic carcinogen
Carbamazepine	CBZ	298-46-4	100	0.25	Nongenotoxic carcinogen
Carbamazepine	CBZ	298-46-4	100	0.375	Nongenotoxic carcinogen
Carbamazepine	CBZ	298-46-4	100	1	Nongenotoxic carcinogen
Carbamazepine	CBZ	298-46-4	100	4	Nongenotoxic carcinogen
Carbamazepine	CBZ	298-46-4	100	8	Nongenotoxic carcinogen
Carbamazepine	CBZ	298-46-4	100	15	Nongenotoxic carcinogen
Carbamazepine	CBZ	298-46-4	100	29	Nongenotoxic carcinogen
Carbamazepine	CBZ	298-46-4	300	0.125	Nongenotoxic carcinogen
Carbamazepine	CBZ	298-46-4	300	0.25	Nongenotoxic carcinogen
Carbamazepine	CBZ	298-46-4	300	0.375	Nongenotoxic carcinogen
Carbamazepine	CBZ	298-46-4	300	1	Nongenotoxic carcinogen
Carbamazepine	CBZ	298-46-4	300	4	Nongenotoxic carcinogen
Carbamazepine	CBZ	298-46-4	300	8	Nongenotoxic carcinogen
Carbamazepine	CBZ	298-46-4	300	15	Nongenotoxic carcinogen
Carbamazepine	CBZ	298-46-4	300	29	Nongenotoxic carcinogen
Carbamazepine	CBZ	298-46-4	490	1	Nongenotoxic carcinogen
Carbamazepine	CBZ	298-46-4	490	3	Nongenotoxic carcinogen
Carbamazepine	CBZ	298-46-4	490	5	Nongenotoxic carcinogen
Carbon Tetrachloride	CCL4	56-23-5	30	0.125	Nongenotoxic carcinogen
Carbon Tetrachloride	CCL4	56-23-5	30	0.25	Nongenotoxic carcinogen
Carbon Tetrachloride	CCL4	56-23-5	30	0.375	Nongenotoxic carcinogen
Carbon Tetrachloride	CCL4	56-23-5	30	1	Nongenotoxic carcinogen
Carbon Tetrachloride	CCL4	56-23-5	30	15	Nongenotoxic carcinogen
Carbon Tetrachloride	CCL4	56-23-5	30	29	Nongenotoxic carcinogen
Carbon Tetrachloride	CCL4	56-23-5	100	0.375	Nongenotoxic carcinogen
Carbon Tetrachloride	CCL4	56-23-5	100	4	Nongenotoxic carcinogen
Carbon Tetrachloride	CCL4	56-23-5	100	15	Nongenotoxic carcinogen
Carbon Tetrachloride	CCL4	56-23-5	300	0.125	Nongenotoxic carcinogen
Carbon Tetrachloride	CCL4	56-23-5	300	0.25	Nongenotoxic carcinogen
Carbon Tetrachloride	CCL4	56-23-5	300	0.375	Nongenotoxic carcinogen
Carbon Tetrachloride	CCL4	56-23-5	300	1	Nongenotoxic carcinogen
Carbon Tetrachloride	CCL4	56-23-5	300	8	Nongenotoxic carcinogen
Carbon Tetrachloride	CCL4	56-23-5	300	15	Nongenotoxic carcinogen
Carbon Tetrachloride	CCL4	56-23-5	300	29	Nongenotoxic carcinogen
Carbon Tetrachloride	CCL4	56-23-5	400	0.25	Nongenotoxic carcinogen
Carbon Tetrachloride	CCL4	56-23-5	400	1	Nongenotoxic carcinogen
Carbon Tetrachloride	CCL4	56-23-5	400	3	Nongenotoxic carcinogen
Carbon Tetrachloride	CCL4	56-23-5	400	7	Nongenotoxic carcinogen
Carbon Tetrachloride	CCL4	56-23-5	1175	0.25	Nongenotoxic carcinogen
Carbon Tetrachloride	CCL4	56-23-5	1175	1	Nongenotoxic carcinogen
Carbon Tetrachloride	CCL4	56-23-5	1175	3	Nongenotoxic carcinogen
Carbon Tetrachloride	CCL4	56-23-5	1175	7	Nongenotoxic carcinogen
Carboplatin	CBP	41575-94-4	1	4	Unknwon
Carboplatin	CBP	41575-94-4	1	8	Unknwon
Carboplatin	CBP	41575-94-4	1	15	Unknwon
Carboplatin	CBP	41575-94-4	1	29	Unknwon
Carboplatin	CBP	41575-94-4	3	4	Unknwon
Carboplatin	CBP	41575-94-4	3	8	Unknwon
Carboplatin	CBP	41575-94-4	3	15	Unknwon
Carboplatin	CBP	41575-94-4	3	29	Unknwon
Carboplatin	CBP	41575-94-4	10	0.125	Unknwon
Carboplatin	CBP	41575-94-4	10	0.25	Unknwon
Carboplatin	CBP	41575-94-4	10	0.375	Unknwon
Carboplatin	CBP	41575-94-4	10	1	Unknwon
Carboplatin	CBP	41575-94-4	10	4	Unknwon
Carboplatin	CBP	41575-94-4	10	8	Unknwon
Carboplatin	CBP	41575-94-4	10	15	Unknwon
Carboplatin	CBP	41575-94-4	10	29	Unknwon
Carboplatin	CBP	41575-94-4	30	0.125	Unknwon
Carboplatin	CBP	41575-94-4	30	0.25	Unknwon
Carboplatin	CBP	41575-94-4	30	0.375	Unknwon
Carboplatin	CBP	41575-94-4	30	1	Unknwon
Carboplatin	CBP	41575-94-4	100	0.125	Unknwon
Carboplatin	CBP	41575-94-4	100	0.25	Unknwon
Carboplatin	CBP	41575-94-4	100	0.375	Unknwon
Carboplatin	CBP	41575-94-4	100	1	Unknwon
Cephalothin	CLT	153-61-7	300	0.125	Non-hepatocarcinogen
Cephalothin	CLT	153-61-7	300	0.25	Non-hepatocarcinogen
Cephalothin	CLT	153-61-7	300	0.375	Non-hepatocarcinogen
Cephalothin	CLT	153-61-7	300	1	Non-hepatocarcinogen
Cephalothin	CLT	153-61-7	300	4	Non-hepatocarcinogen
Cephalothin	CLT	153-61-7	300	8	Non-hepatocarcinogen
Cephalothin	CLT	153-61-7	300	15	Non-hepatocarcinogen
Cephalothin	CLT	153-61-7	300	29	Non-hepatocarcinogen
Cephalothin	CLT	153-61-7	1000	0.125	Non-hepatocarcinogen
Cephalothin	CLT	153-61-7	1000	0.25	Non-hepatocarcinogen
Cephalothin	CLT	153-61-7	1000	0.375	Non-hepatocarcinogen
Cephalothin	CLT	153-61-7	1000	1	Non-hepatocarcinogen
Cephalothin	CLT	153-61-7	1000	4	Non-hepatocarcinogen
Cephalothin	CLT	153-61-7	1000	8	Non-hepatocarcinogen
Cephalothin	CLT	153-61-7	1000	15	Non-hepatocarcinogen
Cephalothin	CLT	153-61-7	1000	29	Non-hepatocarcinogen
Cephalothin	CLT	153-61-7	2000	0.125	Non-hepatocarcinogen
Cephalothin	CLT	153-61-7	2000	0.25	Non-hepatocarcinogen
Cephalothin	CLT	153-61-7	2000	0.375	Non-hepatocarcinogen
Cephalothin	CLT	153-61-7	2000	1	Non-hepatocarcinogen
Cephalothin	CLT	153-61-7	2000	4	Non-hepatocarcinogen
Cephalothin	CLT	153-61-7	2000	8	Non-hepatocarcinogen
Cephalothin	CLT	153-61-7	2000	15	Non-hepatocarcinogen
Cephalothin	CLT	153-61-7	2000	29	Non-hepatocarcinogen
Chloramphenicol	CMP	56-75-7	100	0.125	Non-hepatocarcinogen
Chloramphenicol	CMP	56-75-7	100	0.25	Non-hepatocarcinogen
Chloramphenicol	CMP	56-75-7	100	0.375	Non-hepatocarcinogen
Chloramphenicol	CMP	56-75-7	100	1	Non-hepatocarcinogen
Chloramphenicol	CMP	56-75-7	100	4	Non-hepatocarcinogen
Chloramphenicol	CMP	56-75-7	100	8	Non-hepatocarcinogen
Chloramphenicol	CMP	56-75-7	100	15	Non-hepatocarcinogen
Chloramphenicol	CMP	56-75-7	100	29	Non-hepatocarcinogen
Chloramphenicol	CMP	56-75-7	300	0.125	Non-hepatocarcinogen
Chloramphenicol	CMP	56-75-7	300	0.25	Non-hepatocarcinogen
Chloramphenicol	CMP	56-75-7	300	0.375	Non-hepatocarcinogen
Chloramphenicol	CMP	56-75-7	300	1	Non-hepatocarcinogen
Chloramphenicol	CMP	56-75-7	300	4	Non-hepatocarcinogen
Chloramphenicol	CMP	56-75-7	300	8	Non-hepatocarcinogen
Chloramphenicol	CMP	56-75-7	300	15	Non-hepatocarcinogen
Chloramphenicol	CMP	56-75-7	300	29	Non-hepatocarcinogen
Chloramphenicol	CMP	56-75-7	1000	0.125	Non-hepatocarcinogen
Chloramphenicol	CMP	56-75-7	1000	0.25	Non-hepatocarcinogen
Chloramphenicol	CMP	56-75-7	1000	0.375	Non-hepatocarcinogen
Chloramphenicol	CMP	56-75-7	1000	1	Non-hepatocarcinogen
Chloramphenicol	CMP	56-75-7	1000	4	Non-hepatocarcinogen
Chloramphenicol	CMP	56-75-7	1000	8	Non-hepatocarcinogen
Chloramphenicol	CMP	56-75-7	1000	15	Non-hepatocarcinogen
Chloramphenicol	CMP	56-75-7	1000	29	Non-hepatocarcinogen
Chlormadinone	CLM	1961-77-9	100	4	Non-hepatocarcinogen
Chlormadinone	CLM	1961-77-9	100	8	Non-hepatocarcinogen
Chlormadinone	CLM	1961-77-9	100	15	Non-hepatocarcinogen
Chlormadinone	CLM	1961-77-9	100	29	Non-hepatocarcinogen
Chlormadinone	CLM	1961-77-9	300	0.125	Non-hepatocarcinogen
Chlormadinone	CLM	1961-77-9	300	0.25	Non-hepatocarcinogen
Chlormadinone	CLM	1961-77-9	300	0.375	Non-hepatocarcinogen
Chlormadinone	CLM	1961-77-9	300	1	Non-hepatocarcinogen
Chlormadinone	CLM	1961-77-9	300	4	Non-hepatocarcinogen
Chlormadinone	CLM	1961-77-9	300	8	Non-hepatocarcinogen
Chlormadinone	CLM	1961-77-9	300	15	Non-hepatocarcinogen
Chlormadinone	CLM	1961-77-9	300	29	Non-hepatocarcinogen
Chlormadinone	CLM	1961-77-9	1000	0.125	Non-hepatocarcinogen
Chlormadinone	CLM	1961-77-9	1000	0.25	Non-hepatocarcinogen
Chlormadinone	CLM	1961-77-9	1000	0.375	Non-hepatocarcinogen
Chlormadinone	CLM	1961-77-9	1000	1	Non-hepatocarcinogen
Chlormadinone	CLM	1961-77-9	1000	4	Non-hepatocarcinogen
Chlormadinone	CLM	1961-77-9	1000	8	Non-hepatocarcinogen
Chlormadinone	CLM	1961-77-9	1000	15	Non-hepatocarcinogen
Chlormadinone	CLM	1961-77-9	1000	29	Non-hepatocarcinogen
Chlormadinone	CLM	1961-77-9	2000	0.125	Non-hepatocarcinogen
Chlormadinone	CLM	1961-77-9	2000	0.25	Non-hepatocarcinogen
Chlormadinone	CLM	1961-77-9	2000	0.375	Non-hepatocarcinogen
Chlormadinone	CLM	1961-77-9	2000	1	Non-hepatocarcinogen
Chlormezanone	CMN	80-77-3	50	0.125	Unknwon
Chlormezanone	CMN	80-77-3	50	0.25	Unknwon
Chlormezanone	CMN	80-77-3	50	0.375	Unknwon
Chlormezanone	CMN	80-77-3	50	1	Unknwon
Chlormezanone	CMN	80-77-3	50	4	Unknwon
Chlormezanone	CMN	80-77-3	50	8	Unknwon
Chlormezanone	CMN	80-77-3	50	15	Unknwon
Chlormezanone	CMN	80-77-3	50	29	Unknwon
Chlormezanone	CMN	80-77-3	150	0.125	Unknwon
Chlormezanone	CMN	80-77-3	150	0.25	Unknwon
Chlormezanone	CMN	80-77-3	150	0.375	Unknwon
Chlormezanone	CMN	80-77-3	150	1	Unknwon
Chlormezanone	CMN	80-77-3	150	4	Unknwon
Chlormezanone	CMN	80-77-3	150	8	Unknwon
Chlormezanone	CMN	80-77-3	150	15	Unknwon
Chlormezanone	CMN	80-77-3	150	29	Unknwon
Chlormezanone	CMN	80-77-3	500	0.125	Unknwon
Chlormezanone	CMN	80-77-3	500	0.25	Unknwon
Chlormezanone	CMN	80-77-3	500	0.375	Unknwon
Chlormezanone	CMN	80-77-3	500	1	Unknwon
Chlormezanone	CMN	80-77-3	500	4	Unknwon
Chlormezanone	CMN	80-77-3	500	8	Unknwon
Chlormezanone	CMN	80-77-3	500	15	Unknwon
Chlormezanone	CMN	80-77-3	500	29	Unknwon
Chlorpheniramine	CHL	132-22-9	3	4	Unknwon
Chlorpheniramine	CHL	132-22-9	3	8	Unknwon
Chlorpheniramine	CHL	132-22-9	3	15	Unknwon
Chlorpheniramine	CHL	132-22-9	3	29	Unknwon
Chlorpheniramine	CHL	132-22-9	10	0.125	Unknwon
Chlorpheniramine	CHL	132-22-9	10	0.25	Unknwon
Chlorpheniramine	CHL	132-22-9	10	0.375	Unknwon
Chlorpheniramine	CHL	132-22-9	10	1	Unknwon
Chlorpheniramine	CHL	132-22-9	10	4	Unknwon
Chlorpheniramine	CHL	132-22-9	10	8	Unknwon
Chlorpheniramine	CHL	132-22-9	10	15	Unknwon
Chlorpheniramine	CHL	132-22-9	10	29	Unknwon
Chlorpheniramine	CHL	132-22-9	30	0.125	Unknwon
Chlorpheniramine	CHL	132-22-9	30	0.25	Unknwon
Chlorpheniramine	CHL	132-22-9	30	0.375	Unknwon
Chlorpheniramine	CHL	132-22-9	30	1	Unknwon
Chlorpheniramine	CHL	132-22-9	30	4	Unknwon
Chlorpheniramine	CHL	132-22-9	30	8	Unknwon
Chlorpheniramine	CHL	132-22-9	30	15	Unknwon
Chlorpheniramine	CHL	132-22-9	30	29	Unknwon
Chlorpheniramine	CHL	67-66-3	60	0.25	Nongenotoxic carcinogen
Chlorpheniramine	CHL	67-66-3	600	1	Nongenotoxic carcinogen
Chlorpheniramine	CHL	67-66-3	600	3	Nongenotoxic carcinogen
Chlorpheniramine	CHL	67-66-3	600	5	Nongenotoxic carcinogen
Chlorpromazine	CPZ	50-53-3	4.5	4	Non-hepatocarcinogen
Chlorpromazine	CPZ	50-53-3	4.5	8	Non-hepatocarcinogen
Chlorpromazine	CPZ	50-53-3	4.5	15	Non-hepatocarcinogen
Chlorpromazine	CPZ	50-53-3	4.5	29	Non-hepatocarcinogen
Chlorpromazine	CPZ	50-53-3	15	4	Non-hepatocarcinogen
Chlorpromazine	CPZ	50-53-3	15	8	Non-hepatocarcinogen
Chlorpromazine	CPZ	50-53-3	15	15	Non-hepatocarcinogen
Chlorpromazine	CPZ	50-53-3	15	29	Non-hepatocarcinogen
Chlorpromazine	CPZ	50-53-3	45	0.125	Non-hepatocarcinogen
Chlorpromazine	CPZ	50-53-3	45	0.25	Non-hepatocarcinogen
Chlorpromazine	CPZ	50-53-3	45	0.375	Non-hepatocarcinogen
Chlorpromazine	CPZ	50-53-3	45	1	Non-hepatocarcinogen
Chlorpromazine	CPZ	50-53-3	45	4	Non-hepatocarcinogen
Chlorpromazine	CPZ	50-53-3	45	8	Non-hepatocarcinogen
Chlorpromazine	CPZ	50-53-3	45	15	Non-hepatocarcinogen
Chlorpromazine	CPZ	50-53-3	45	29	Non-hepatocarcinogen
Chlorpromazine	CPZ	50-53-3	150	0.125	Non-hepatocarcinogen
Chlorpromazine	CPZ	50-53-3	150	0.25	Non-hepatocarcinogen
Chlorpromazine	CPZ	50-53-3	150	0.375	Non-hepatocarcinogen
Chlorpromazine	CPZ	50-53-3	150	1	Non-hepatocarcinogen
Chlorpropamide	CPP	94-20-2	30	0.125	Non-hepatocarcinogen
Chlorpropamide	CPP	94-20-2	30	0.25	Non-hepatocarcinogen
Chlorpropamide	CPP	94-20-2	30	0.375	Non-hepatocarcinogen
Chlorpropamide	CPP	94-20-2	30	1	Non-hepatocarcinogen
Chlorpropamide	CPP	94-20-2	30	4	Non-hepatocarcinogen
Chlorpropamide	CPP	94-20-2	30	8	Non-hepatocarcinogen
Chlorpropamide	CPP	94-20-2	30	15	Non-hepatocarcinogen
Chlorpropamide	CPP	94-20-2	30	29	Non-hepatocarcinogen
Chlorpropamide	CPP	94-20-2	100	0.125	Non-hepatocarcinogen
Chlorpropamide	CPP	94-20-2	100	0.25	Non-hepatocarcinogen
Chlorpropamide	CPP	94-20-2	100	0.375	Non-hepatocarcinogen
Chlorpropamide	CPP	94-20-2	100	1	Non-hepatocarcinogen
Chlorpropamide	CPP	94-20-2	100	4	Non-hepatocarcinogen
Chlorpropamide	CPP	94-20-2	100	8	Non-hepatocarcinogen
Chlorpropamide	CPP	94-20-2	100	15	Non-hepatocarcinogen
Chlorpropamide	CPP	94-20-2	100	29	Non-hepatocarcinogen
Chlorpropamide	CPP	94-20-2	300	0.125	Non-hepatocarcinogen
Chlorpropamide	CPP	94-20-2	300	0.25	Non-hepatocarcinogen
Chlorpropamide	CPP	94-20-2	300	0.375	Non-hepatocarcinogen
Chlorpropamide	CPP	94-20-2	300	1	Non-hepatocarcinogen
Chlorpropamide	CPP	94-20-2	300	4	Non-hepatocarcinogen
Chlorpropamide	CPP	94-20-2	300	8	Non-hepatocarcinogen
Chlorpropamide	CPP	94-20-2	300	15	Non-hepatocarcinogen
Chlorpropamide	CPP	94-20-2	300	29	Non-hepatocarcinogen
Cimetidine	CIM	51481-61-9	100	0.125	Non-hepatocarcinogen
Cimetidine	CIM	51481-61-9	100	0.25	Non-hepatocarcinogen
Cimetidine	CIM	51481-61-9	100	0.375	Non-hepatocarcinogen
Cimetidine	CIM	51481-61-9	100	1	Non-hepatocarcinogen
Cimetidine	CIM	51481-61-9	100	4	Non-hepatocarcinogen
Cimetidine	CIM	51481-61-9	100	8	Non-hepatocarcinogen
Cimetidine	CIM	51481-61-9	100	15	Non-hepatocarcinogen
Cimetidine	CIM	51481-61-9	100	29	Non-hepatocarcinogen
Cimetidine	CIM	51481-61-9	300	0.125	Non-hepatocarcinogen
Cimetidine	CIM	51481-61-9	300	0.25	Non-hepatocarcinogen
Cimetidine	CIM	51481-61-9	300	0.375	Non-hepatocarcinogen
Cimetidine	CIM	51481-61-9	300	1	Non-hepatocarcinogen
Cimetidine	CIM	51481-61-9	300	4	Non-hepatocarcinogen
Cimetidine	CIM	51481-61-9	300	8	Non-hepatocarcinogen
Cimetidine	CIM	51481-61-9	300	15	Non-hepatocarcinogen
Cimetidine	CIM	51481-61-9	300	29	Non-hepatocarcinogen
Cimetidine	CIM	51481-61-9	1000	0.125	Non-hepatocarcinogen
Cimetidine	CIM	51481-61-9	1000	0.25	Non-hepatocarcinogen
Cimetidine	CIM	51481-61-9	1000	0.375	Non-hepatocarcinogen
Cimetidine	CIM	51481-61-9	1000	1	Non-hepatocarcinogen
Cimetidine	CIM	51481-61-9	1000	4	Non-hepatocarcinogen
Cimetidine	CIM	51481-61-9	1000	8	Non-hepatocarcinogen
Cimetidine	CIM	51481-61-9	1000	15	Non-hepatocarcinogen
Cimetidine	CIM	51481-61-9	1000	29	Non-hepatocarcinogen
Ciprofloxacin	CPX	85721-33-1	100	0.125	Non-hepatocarcinogen
Ciprofloxacin	CPX	85721-33-1	100	0.25	Non-hepatocarcinogen
Ciprofloxacin	CPX	85721-33-1	100	0.375	Non-hepatocarcinogen
Ciprofloxacin	CPX	85721-33-1	100	1	Non-hepatocarcinogen
Ciprofloxacin	CPX	85721-33-1	100	4	Non-hepatocarcinogen
Ciprofloxacin	CPX	85721-33-1	100	8	Non-hepatocarcinogen
Ciprofloxacin	CPX	85721-33-1	100	15	Non-hepatocarcinogen
Ciprofloxacin	CPX	85721-33-1	100	29	Non-hepatocarcinogen
Ciprofloxacin	CPX	85721-33-1	300	0.125	Non-hepatocarcinogen
Ciprofloxacin	CPX	85721-33-1	300	0.25	Non-hepatocarcinogen
Ciprofloxacin	CPX	85721-33-1	300	0.375	Non-hepatocarcinogen
Ciprofloxacin	CPX	85721-33-1	300	1	Non-hepatocarcinogen
Ciprofloxacin	CPX	85721-33-1	300	4	Non-hepatocarcinogen
Ciprofloxacin	CPX	85721-33-1	300	8	Non-hepatocarcinogen
Ciprofloxacin	CPX	85721-33-1	300	15	Non-hepatocarcinogen
Ciprofloxacin	CPX	85721-33-1	300	29	Non-hepatocarcinogen
Ciprofloxacin	CPX	85721-33-1	1000	0.125	Non-hepatocarcinogen
Ciprofloxacin	CPX	85721-33-1	1000	0.25	Non-hepatocarcinogen
Ciprofloxacin	CPX	85721-33-1	1000	0.375	Non-hepatocarcinogen
Ciprofloxacin	CPX	85721-33-1	1000	1	Non-hepatocarcinogen
Ciprofloxacin	CPX	85721-33-1	1000	4	Non-hepatocarcinogen
Ciprofloxacin	CPX	85721-33-1	1000	8	Non-hepatocarcinogen
Ciprofloxacin	CPX	85721-33-1	1000	15	Non-hepatocarcinogen
Ciprofloxacin	CPX	85721-33-1	1000	29	Non-hepatocarcinogen
Cisplatin	CSP	15663-27-1	0.1	4	Non-hepatocarcinogen
Cisplatin	CSP	15663-27-1	0.1	8	Non-hepatocarcinogen
Cisplatin	CSP	15663-27-1	0.1	15	Non-hepatocarcinogen
Cisplatin	CSP	15663-27-1	0.1	29	Non-hepatocarcinogen
Cisplatin	CSP	15663-27-1	0.3	0.125	Non-hepatocarcinogen
Cisplatin	CSP	15663-27-1	0.3	0.25	Non-hepatocarcinogen
Cisplatin	CSP	15663-27-1	0.3	0.375	Non-hepatocarcinogen
Cisplatin	CSP	15663-27-1	0.3	1	Non-hepatocarcinogen
Cisplatin	CSP	15663-27-1	0.3	4	Non-hepatocarcinogen
Cisplatin	CSP	15663-27-1	0.3	8	Non-hepatocarcinogen
Cisplatin	CSP	15663-27-1	0.3	15	Non-hepatocarcinogen
Cisplatin	CSP	15663-27-1	0.3	29	Non-hepatocarcinogen
Cisplatin	CSP	15663-27-1	1	0.125	Non-hepatocarcinogen
Cisplatin	CSP	15663-27-1	1	0.25	Non-hepatocarcinogen
Cisplatin	CSP	15663-27-1	1	0.375	Non-hepatocarcinogen
Cisplatin	CSP	15663-27-1	1	1	Non-hepatocarcinogen
Cisplatin	CSP	15663-27-1	1	4	Non-hepatocarcinogen
Cisplatin	CSP	15663-27-1	1	8	Non-hepatocarcinogen
Cisplatin	CSP	15663-27-1	1	15	Non-hepatocarcinogen
Cisplatin	CSP	15663-27-1	1	29	Non-hepatocarcinogen
Cisplatin	CSP	15663-27-1	3	0.125	Non-hepatocarcinogen
Cisplatin	CSP	15663-27-1	3	0.25	Non-hepatocarcinogen
Cisplatin	CSP	15663-27-1	3	0.375	Non-hepatocarcinogen
Cisplatin	CSP	15663-27-1	3	1	Non-hepatocarcinogen
Clofibrate	CFB	637-07-0	30	0.125	Nongenotoxic carcinogen
Clofibrate	CFB	637-07-0	30	0.25	Nongenotoxic carcinogen
Clofibrate	CFB	637-07-0	30	0.375	Nongenotoxic carcinogen
Clofibrate	CFB	637-07-0	30	1	Nongenotoxic carcinogen
Clofibrate	CFB	637-07-0	30	4	Nongenotoxic carcinogen
Clofibrate	CFB	637-07-0	30	8	Nongenotoxic carcinogen
Clofibrate	CFB	637-07-0	30	15	Nongenotoxic carcinogen
Clofibrate	CFB	637-07-0	100	0.25	Nongenotoxic carcinogen
Clofibrate	CFB	637-07-0	100	0.375	Nongenotoxic carcinogen
Clofibrate	CFB	637-07-0	100	1	Nongenotoxic carcinogen
Clofibrate	CFB	637-07-0	100	4	Nongenotoxic carcinogen
Clofibrate	CFB	637-07-0	100	8	Nongenotoxic carcinogen
Clofibrate	CFB	637-07-0	100	15	Nongenotoxic carcinogen
Clofibrate	CFB	637-07-0	130	3	Nongenotoxic carcinogen
Clofibrate	CFB	637-07-0	130	7	Nongenotoxic carcinogen
Clofibrate	CFB	637-07-0	300	0.125	Nongenotoxic carcinogen
Clofibrate	CFB	637-07-0	300	0.25	Nongenotoxic carcinogen
Clofibrate	CFB	637-07-0	300	0.375	Nongenotoxic carcinogen
Clofibrate	CFB	637-07-0	300	1	Nongenotoxic carcinogen
Clofibrate	CFB	637-07-0	300	4	Nongenotoxic carcinogen
Clofibrate	CFB	637-07-0	300	8	Nongenotoxic carcinogen
Clofibrate	CFB	637-07-0	300	15	Nongenotoxic carcinogen
Clofibrate	CFB	637-07-0	300	29	Nongenotoxic carcinogen
Clofibrate	CFB	637-07-0	500	7	Nongenotoxic carcinogen
Clomipramine	CPM	303-49-1	10	0.125	Non-hepatocarcinogen
Clomipramine	CPM	303-49-1	10	0.375	Non-hepatocarcinogen
Clomipramine	CPM	303-49-1	10	1	Non-hepatocarcinogen
Clomipramine	CPM	303-49-1	10	4	Non-hepatocarcinogen
Clomipramine	CPM	303-49-1	10	8	Non-hepatocarcinogen
Clomipramine	CPM	303-49-1	10	15	Non-hepatocarcinogen
Clomipramine	CPM	303-49-1	10	29	Non-hepatocarcinogen
Clomipramine	CPM	303-49-1	30	0.125	Non-hepatocarcinogen
Clomipramine	CPM	303-49-1	30	0.25	Non-hepatocarcinogen
Clomipramine	CPM	303-49-1	30	0.375	Non-hepatocarcinogen
Clomipramine	CPM	303-49-1	30	1	Non-hepatocarcinogen
Clomipramine	CPM	303-49-1	30	4	Non-hepatocarcinogen
Clomipramine	CPM	303-49-1	30	8	Non-hepatocarcinogen
Clomipramine	CPM	303-49-1	30	15	Non-hepatocarcinogen
Clomipramine	CPM	303-49-1	30	29	Non-hepatocarcinogen
Clomipramine	CPM	303-49-1	100	0.125	Non-hepatocarcinogen
Clomipramine	CPM	303-49-1	100	0.25	Non-hepatocarcinogen
Clomipramine	CPM	303-49-1	100	0.375	Non-hepatocarcinogen
Clomipramine	CPM	303-49-1	100	1	Non-hepatocarcinogen
Clomipramine	CPM	303-49-1	100	4	Non-hepatocarcinogen
Clomipramine	CPM	303-49-1	100	8	Non-hepatocarcinogen
Clomipramine	CPM	303-49-1	100	15	Non-hepatocarcinogen
Clomipramine	CPM	303-49-1	100	29	Non-hepatocarcinogen
Clomipramine	CPM	303-49-1	115	3	Non-hepatocarcinogen
Colchicine	COL	64-86-8	0.5	4	Non-hepatocarcinogen
Colchicine	COL	64-86-8	0.5	8	Non-hepatocarcinogen
Colchicine	COL	64-86-8	0.5	15	Non-hepatocarcinogen
Colchicine	COL	64-86-8	0.5	29	Non-hepatocarcinogen
Colchicine	COL	64-86-8	1.5	0.125	Non-hepatocarcinogen
Colchicine	COL	64-86-8	1.5	0.25	Non-hepatocarcinogen
Colchicine	COL	64-86-8	1.5	0.375	Non-hepatocarcinogen
Colchicine	COL	64-86-8	1.5	1	Non-hepatocarcinogen
Colchicine	COL	64-86-8	1.5	4	Non-hepatocarcinogen
Colchicine	COL	64-86-8	1.5	8	Non-hepatocarcinogen
Colchicine	COL	64-86-8	1.5	15	Non-hepatocarcinogen
Colchicine	COL	64-86-8	1.5	29	Non-hepatocarcinogen
Colchicine	COL	64-86-8	5	0.125	Non-hepatocarcinogen
Colchicine	COL	64-86-8	5	0.25	Non-hepatocarcinogen
Colchicine	COL	64-86-8	5	0.375	Non-hepatocarcinogen
Colchicine	COL	64-86-8	5	1	Non-hepatocarcinogen
Colchicine	COL	64-86-8	5	4	Non-hepatocarcinogen
Colchicine	COL	64-86-8	5	8	Non-hepatocarcinogen
Colchicine	COL	64-86-8	5	15	Non-hepatocarcinogen
Colchicine	COL	64-86-8	5	29	Non-hepatocarcinogen
Colchicine	COL	64-86-8	15	0.125	Non-hepatocarcinogen
Colchicine	COL	64-86-8	15	0.25	Non-hepatocarcinogen
Colchicine	COL	64-86-8	15	0.375	Non-hepatocarcinogen
Colchicine	COL	64-86-8	15	1	Non-hepatocarcinogen
Coumarin	CMA	91-64-5	15	0.125	Genotoxic carcinogen
Coumarin	CMA	91-64-5	15	0.25	Genotoxic carcinogen
Coumarin	CMA	91-64-5	15	0.375	Genotoxic carcinogen
Coumarin	CMA	91-64-5	15	1	Genotoxic carcinogen
Coumarin	CMA	91-64-5	15	4	Genotoxic carcinogen
Coumarin	CMA	91-64-5	15	8	Genotoxic carcinogen
Coumarin	CMA	91-64-5	15	15	Genotoxic carcinogen
Coumarin	CMA	91-64-5	15	29	Genotoxic carcinogen
Coumarin	CMA	91-64-5	50	0.125	Genotoxic carcinogen
Coumarin	CMA	91-64-5	50	0.25	Genotoxic carcinogen
Coumarin	CMA	91-64-5	50	0.375	Genotoxic carcinogen
Coumarin	CMA	91-64-5	50	1	Genotoxic carcinogen
Coumarin	CMA	91-64-5	50	4	Genotoxic carcinogen
Coumarin	CMA	91-64-5	50	8	Genotoxic carcinogen
Coumarin	CMA	91-64-5	50	15	Genotoxic carcinogen
Coumarin	CMA	91-64-5	50	29	Genotoxic carcinogen
Coumarin	CMA	91-64-5	150	0.125	Genotoxic carcinogen
Coumarin	CMA	91-64-5	150	0.25	Genotoxic carcinogen
Coumarin	CMA	91-64-5	150	0.375	Genotoxic carcinogen
Coumarin	CMA	91-64-5	150	1	Genotoxic carcinogen
Coumarin	CMA	91-64-5	150	4	Genotoxic carcinogen
Coumarin	CMA	91-64-5	150	8	Genotoxic carcinogen
Coumarin	CMA	91-64-5	150	15	Genotoxic carcinogen
Coumarin	CMA	91-64-5	150	29	Genotoxic carcinogen
Cycloheximide	CHX	66-81-9	1	0.125	Unknwon
Cycloheximide	CHX	66-81-9	1	0.25	Unknwon
Cycloheximide	CHX	66-81-9	1	0.375	Unknwon
Cycloheximide	CHX	66-81-9	1	1	Unknwon
Cycloheximide	CHX	66-81-9	3	0.125	Unknwon
Cycloheximide	CHX	66-81-9	3	0.25	Unknwon
Cycloheximide	CHX	66-81-9	3	0.375	Unknwon
Cycloheximide	CHX	66-81-9	3	1	Unknwon
Cycloheximide	CHX	66-81-9	10	0.125	Unknwon
Cycloheximide	CHX	66-81-9	10	0.25	Unknwon
Cycloheximide	CHX	66-81-9	10	0.375	Unknwon
Cycloheximide	CHX	66-81-9	10	1	Unknwon
Cyclophosphamide	CPA	50-18-0	5	4	Non-hepatocarcinogen
Cyclophosphamide	CPA	50-18-0	5	8	Non-hepatocarcinogen
Cyclophosphamide	CPA	50-18-0	5	15	Non-hepatocarcinogen
Cyclophosphamide	CPA	50-18-0	5	29	Non-hepatocarcinogen
Cyclophosphamide	CPA	50-18-0	15	0.125	Non-hepatocarcinogen
Cyclophosphamide	CPA	50-18-0	15	0.25	Non-hepatocarcinogen
Cyclophosphamide	CPA	50-18-0	15	0.375	Non-hepatocarcinogen
Cyclophosphamide	CPA	50-18-0	15	1	Non-hepatocarcinogen
Cyclophosphamide	CPA	50-18-0	15	4	Non-hepatocarcinogen
Cyclophosphamide	CPA	50-18-0	15	8	Non-hepatocarcinogen
Cyclophosphamide	CPA	50-18-0	15	15	Non-hepatocarcinogen
Cyclophosphamide	CPA	50-18-0	15	29	Non-hepatocarcinogen
Cyclophosphamide	CPA	50-18-0	50	0.125	Non-hepatocarcinogen
Cyclophosphamide	CPA	50-18-0	50	0.25	Non-hepatocarcinogen
Cyclophosphamide	CPA	50-18-0	50	0.375	Non-hepatocarcinogen
Cyclophosphamide	CPA	50-18-0	50	1	Non-hepatocarcinogen
Cyclophosphamide	CPA	50-18-0	150	0.125	Non-hepatocarcinogen
Cyclophosphamide	CPA	50-18-0	150	0.25	Non-hepatocarcinogen
Cyclophosphamide	CPA	50-18-0	150	0.375	Non-hepatocarcinogen
Cyclophosphamide	CPA	50-18-0	150	1	Non-hepatocarcinogen
Cyclophosphamide	CPA	427-51-0	2500	0.25	Nongenotoxic carcinogen
Cyclophosphamide	CPA	427-51-0	2500	1	Nongenotoxic carcinogen
Cyclophosphamide	CPA	427-51-0	2500	3	Nongenotoxic carcinogen
Cyclophosphamide	CPA	427-51-0	2500	5	Nongenotoxic carcinogen
Cyclosporine A	CSA	59865-13-3	10	4	Non-hepatocarcinogen
Cyclosporine A	CSA	59865-13-3	10	8	Non-hepatocarcinogen
Cyclosporine A	CSA	59865-13-3	10	15	Non-hepatocarcinogen
Cyclosporine A	CSA	59865-13-3	10	29	Non-hepatocarcinogen
Cyclosporine A	CSA	59865-13-3	30	0.125	Non-hepatocarcinogen
Cyclosporine A	CSA	59865-13-3	30	0.25	Non-hepatocarcinogen
Cyclosporine A	CSA	59865-13-3	30	0.375	Non-hepatocarcinogen
Cyclosporine A	CSA	59865-13-3	30	1	Non-hepatocarcinogen
Cyclosporine A	CSA	59865-13-3	30	4	Non-hepatocarcinogen
Cyclosporine A	CSA	59865-13-3	30	8	Non-hepatocarcinogen
Cyclosporine A	CSA	59865-13-3	30	15	Non-hepatocarcinogen
Cyclosporine A	CSA	59865-13-3	30	29	Non-hepatocarcinogen
Cyclosporine A	CSA	59865-13-3	100	0.125	Non-hepatocarcinogen
Cyclosporine A	CSA	59865-13-3	100	0.25	Non-hepatocarcinogen
Cyclosporine A	CSA	59865-13-3	100	0.375	Non-hepatocarcinogen
Cyclosporine A	CSA	59865-13-3	100	4	Non-hepatocarcinogen
Cyclosporine A	CSA	59865-13-3	100	8	Non-hepatocarcinogen
Cyclosporine A	CSA	59865-13-3	100	15	Non-hepatocarcinogen
Cyclosporine A	CSA	59865-13-3	100	29	Non-hepatocarcinogen
Cyclosporine A	CSA	59865-13-3	300	0.125	Non-hepatocarcinogen
Cyclosporine A	CSA	59865-13-3	300	0.25	Non-hepatocarcinogen
Cyclosporine A	CSA	59865-13-3	300	0.375	Non-hepatocarcinogen
Cyclosporine A	CSA	59865-13-3	300	1	Non-hepatocarcinogen
Cyclosporine A	CSA	59865-13-3	350	5	Non-hepatocarcinogen
Danazol	DNZ	17230-88-5	100	4	Non-hepatocarcinogen
Danazol	DNZ	17230-88-5	100	8	Non-hepatocarcinogen
Danazol	DNZ	17230-88-5	100	15	Non-hepatocarcinogen
Danazol	DNZ	17230-88-5	100	29	Non-hepatocarcinogen
Danazol	DNZ	17230-88-5	300	0.125	Non-hepatocarcinogen
Danazol	DNZ	17230-88-5	300	0.25	Non-hepatocarcinogen
Danazol	DNZ	17230-88-5	300	1	Non-hepatocarcinogen
Danazol	DNZ	17230-88-5	300	4	Non-hepatocarcinogen
Danazol	DNZ	17230-88-5	300	8	Non-hepatocarcinogen
Danazol	DNZ	17230-88-5	300	15	Non-hepatocarcinogen
Danazol	DNZ	17230-88-5	300	29	Non-hepatocarcinogen
Danazol	DNZ	17230-88-5	1000	0.125	Non-hepatocarcinogen
Danazol	DNZ	17230-88-5	1000	0.25	Non-hepatocarcinogen
Danazol	DNZ	17230-88-5	1000	0.375	Non-hepatocarcinogen
Danazol	DNZ	17230-88-5	1000	1	Non-hepatocarcinogen
Danazol	DNZ	17230-88-5	1000	4	Non-hepatocarcinogen
Danazol	DNZ	17230-88-5	1000	8	Non-hepatocarcinogen
Danazol	DNZ	17230-88-5	1000	15	Non-hepatocarcinogen
Danazol	DNZ	17230-88-5	1000	29	Non-hepatocarcinogen
Danazol	DNZ	17230-88-5	2000	0.125	Non-hepatocarcinogen
Danazol	DNZ	17230-88-5	2000	0.25	Non-hepatocarcinogen
Danazol	DNZ	17230-88-5	2000	0.375	Non-hepatocarcinogen
Danazol	DNZ	17230-88-5	2000	1	Non-hepatocarcinogen
Danazol	DNZ	17230-88-5	2000	3	Non-hepatocarcinogen
Dantrolene	DTL	7261-97-4	25	0.125	Unknwon
Dantrolene	DTL	7261-97-4	25	0.25	Unknwon
Dantrolene	DTL	7261-97-4	25	0.375	Unknwon
Dantrolene	DTL	7261-97-4	25	1	Unknwon
Dantrolene	DTL	7261-97-4	25	4	Unknwon
Dantrolene	DTL	7261-97-4	25	8	Unknwon
Dantrolene	DTL	7261-97-4	25	15	Unknwon
Dantrolene	DTL	7261-97-4	25	29	Unknwon
Dantrolene	DTL	7261-97-4	75	0.125	Unknwon
Dantrolene	DTL	7261-97-4	75	0.25	Unknwon
Dantrolene	DTL	7261-97-4	75	0.375	Unknwon
Dantrolene	DTL	7261-97-4	75	1	Unknwon
Dantrolene	DTL	7261-97-4	75	4	Unknwon
Dantrolene	DTL	7261-97-4	75	8	Unknwon
Dantrolene	DTL	7261-97-4	75	15	Unknwon
Dantrolene	DTL	7261-97-4	75	29	Unknwon
Dantrolene	DTL	7261-97-4	250	0.125	Unknwon
Dantrolene	DTL	7261-97-4	250	0.25	Unknwon
Dantrolene	DTL	7261-97-4	250	0.375	Unknwon
Dantrolene	DTL	7261-97-4	250	1	Unknwon
Dantrolene	DTL	7261-97-4	250	4	Unknwon
Dantrolene	DTL	7261-97-4	250	8	Unknwon
Dantrolene	DTL	7261-97-4	250	15	Unknwon
Dantrolene	DTL	7261-97-4	250	29	Unknwon
Desmopressin Acetate	DDAVP	62288-83-9	2	4	Unknwon
Desmopressin Acetate	DDAVP	62288-83-9	2	8	Unknwon
Desmopressin Acetate	DDAVP	62288-83-9	2	15	Unknwon
Desmopressin Acetate	DDAVP	62288-83-9	2	29	Unknwon
Desmopressin Acetate	DDAVP	62288-83-9	20	0.125	Unknwon
Desmopressin Acetate	DDAVP	62288-83-9	20	0.25	Unknwon
Desmopressin Acetate	DDAVP	62288-83-9	20	0.375	Unknwon
Desmopressin Acetate	DDAVP	62288-83-9	20	1	Unknwon
Desmopressin Acetate	DDAVP	62288-83-9	20	4	Unknwon
Desmopressin Acetate	DDAVP	62288-83-9	20	8	Unknwon
Desmopressin Acetate	DDAVP	62288-83-9	20	15	Unknwon
Desmopressin Acetate	DDAVP	62288-83-9	20	29	Unknwon
Desmopressin Acetate	DDAVP	62288-83-9	200	0.125	Unknwon
Desmopressin Acetate	DDAVP	62288-83-9	200	0.25	Unknwon
Desmopressin Acetate	DDAVP	62288-83-9	200	0.375	Unknwon
Desmopressin Acetate	DDAVP	62288-83-9	200	1	Unknwon
Desmopressin Acetate	DDAVP	62288-83-9	200	4	Unknwon
Desmopressin Acetate	DDAVP	62288-83-9	200	8	Unknwon
Desmopressin Acetate	DDAVP	62288-83-9	200	15	Unknwon
Desmopressin Acetate	DDAVP	62288-83-9	200	29	Unknwon
Desmopressin Acetate	DDAVP	62288-83-9	2000	0.125	Unknwon
Desmopressin Acetate	DDAVP	62288-83-9	2000	0.25	Unknwon
Desmopressin Acetate	DDAVP	62288-83-9	2000	0.375	Unknwon
Desmopressin Acetate	DDAVP	62288-83-9	2000	1	Unknwon
Dexamethasone	DEX	50-02-2	0.5	0.375	Non-hepatocarcinogen
Dexamethasone	DEX	50-02-2	1	5	Non-hepatocarcinogen
Dexamethasone	DEX	50-02-2	5	0.25	Non-hepatocarcinogen
Dexamethasone	DEX	50-02-2	5	0.375	Non-hepatocarcinogen
Dexamethasone	DEX	50-02-2	5	1	Non-hepatocarcinogen
Dexamethasone	DEX	50-02-2	50	0.125	Non-hepatocarcinogen
Dexamethasone	DEX	50-02-2	50	0.25	Non-hepatocarcinogen
Dexamethasone	DEX	50-02-2	50	0.375	Non-hepatocarcinogen
Dexamethasone	DEX	50-02-2	50	1	Non-hepatocarcinogen
Dexamethasone	DEX	50-02-2	150	0.25	Non-hepatocarcinogen
Dexamethasone	DEX	50-02-2	150	1	Non-hepatocarcinogen
Dexamethasone	DEX	50-02-2	150	3	Non-hepatocarcinogen
Diazepam	DZP	439-14-5	25	1	Non-hepatocarcinogen
Diazepam	DZP	439-14-5	25	4	Non-hepatocarcinogen
Diazepam	DZP	439-14-5	25	8	Non-hepatocarcinogen
Diazepam	DZP	439-14-5	25	15	Non-hepatocarcinogen
Diazepam	DZP	439-14-5	25	29	Non-hepatocarcinogen
Diazepam	DZP	439-14-5	75	0.125	Non-hepatocarcinogen
Diazepam	DZP	439-14-5	75	0.25	Non-hepatocarcinogen
Diazepam	DZP	439-14-5	75	0.375	Non-hepatocarcinogen
Diazepam	DZP	439-14-5	75	1	Non-hepatocarcinogen
Diazepam	DZP	439-14-5	75	4	Non-hepatocarcinogen
Diazepam	DZP	439-14-5	75	8	Non-hepatocarcinogen
Diazepam	DZP	439-14-5	75	15	Non-hepatocarcinogen
Diazepam	DZP	439-14-5	75	29	Non-hepatocarcinogen
Diazepam	DZP	439-14-5	250	0.125	Non-hepatocarcinogen
Diazepam	DZP	439-14-5	250	0.25	Non-hepatocarcinogen
Diazepam	DZP	439-14-5	250	0.375	Non-hepatocarcinogen
Diazepam	DZP	439-14-5	250	1	Non-hepatocarcinogen
Diazepam	DZP	439-14-5	250	4	Non-hepatocarcinogen
Diazepam	DZP	439-14-5	250	8	Non-hepatocarcinogen
Diazepam	DZP	439-14-5	250	15	Non-hepatocarcinogen
Diazepam	DZP	439-14-5	250	29	Non-hepatocarcinogen
Diazepam	DZP	439-14-5	710	1	Non-hepatocarcinogen
Diazepam	DZP	439-14-5	710	3	Non-hepatocarcinogen
Diazepam	DZP	439-14-5	710	5	Non-hepatocarcinogen
Diclofenac	DFNa	15307-86-5	1	4	Non-hepatocarcinogen
Diclofenac	DFNa	15307-86-5	1	8	Non-hepatocarcinogen
Diclofenac	DFNa	15307-86-5	1	15	Non-hepatocarcinogen
Diclofenac	DFNa	15307-86-5	1	29	Non-hepatocarcinogen
Diclofenac	DFNa	15307-86-5	3	4	Non-hepatocarcinogen
Diclofenac	DFNa	15307-86-5	3	15	Non-hepatocarcinogen
Diclofenac	DFNa	15307-86-5	10	0.125	Non-hepatocarcinogen
Diclofenac	DFNa	15307-86-5	10	0.25	Non-hepatocarcinogen
Diclofenac	DFNa	15307-86-5	10	0.25	Non-hepatocarcinogen
Diclofenac	DFNa	15307-86-5	10	0.375	Non-hepatocarcinogen
Diclofenac	DFNa	15307-86-5	10	1	Non-hepatocarcinogen
Diclofenac	DFNa	15307-86-5	10	1	Non-hepatocarcinogen
Diclofenac	DFNa	15307-86-5	10	3	Non-hepatocarcinogen
Diclofenac	DFNa	15307-86-5	10	4	Non-hepatocarcinogen
Diclofenac	DFNa	15307-86-5	10	8	Non-hepatocarcinogen
Diclofenac	DFNa	15307-86-5	10	15	Non-hepatocarcinogen
Diclofenac	DFNa	15307-86-5	10	29	Non-hepatocarcinogen
Diclofenac	DFNa	15307-86-5	30	0.125	Non-hepatocarcinogen
Diclofenac	DFNa	15307-86-5	30	0.25	Non-hepatocarcinogen
Diclofenac	DFNa	15307-86-5	30	0.375	Non-hepatocarcinogen
Diclofenac	DFNa	15307-86-5	30	1	Non-hepatocarcinogen
Diclofenac	DFNa	15307-86-5	100	0.125	Non-hepatocarcinogen
Diclofenac	DFNa	15307-86-5	100	0.375	Non-hepatocarcinogen
Diclofenac	DFNa	15307-86-5	100	1	Non-hepatocarcinogen
Diethyl Maleate	DEM	141-05-09	80	0.125	Unknwon
Diethyl Maleate	DEM	141-05-09	80	0.25	Unknwon
Diethyl Maleate	DEM	141-05-09	80	0.375	Unknwon
Diethyl Maleate	DEM	141-05-09	80	1	Unknwon
Diethyl Maleate	DEM	141-05-09	240	0.125	Unknwon
Diethyl Maleate	DEM	141-05-09	240	0.25	Unknwon
Diethyl Maleate	DEM	141-05-09	240	0.375	Unknwon
Diethyl Maleate	DEM	141-05-09	240	1	Unknwon
Diethyl Maleate	DEM	141-05-09	800	0.125	Unknwon
Diethyl Maleate	DEM	141-05-09	800	0.25	Unknwon
Diethyl Maleate	DEM	141-05-09	800	0.375	Unknwon
Diethyl Maleate	DEM	141-05-09	800	1	Unknwon
Diltiazem	DIL	42399-41-7	80	0.125	Non-hepatocarcinogen
Diltiazem	DIL	42399-41-7	80	0.25	Non-hepatocarcinogen
Diltiazem	DIL	42399-41-7	80	0.375	Non-hepatocarcinogen
Diltiazem	DIL	42399-41-7	80	1	Non-hepatocarcinogen
Diltiazem	DIL	42399-41-7	80	4	Non-hepatocarcinogen
Diltiazem	DIL	42399-41-7	80	8	Non-hepatocarcinogen
Diltiazem	DIL	42399-41-7	80	15	Non-hepatocarcinogen
Diltiazem	DIL	42399-41-7	80	29	Non-hepatocarcinogen
Diltiazem	DIL	42399-41-7	240	0.125	Non-hepatocarcinogen
Diltiazem	DIL	42399-41-7	240	0.25	Non-hepatocarcinogen
Diltiazem	DIL	42399-41-7	240	0.375	Non-hepatocarcinogen
Diltiazem	DIL	42399-41-7	240	1	Non-hepatocarcinogen
Diltiazem	DIL	42399-41-7	240	4	Non-hepatocarcinogen
Diltiazem	DIL	42399-41-7	240	8	Non-hepatocarcinogen
Diltiazem	DIL	42399-41-7	240	15	Non-hepatocarcinogen
Diltiazem	DIL	42399-41-7	240	29	Non-hepatocarcinogen
Diltiazem	DIL	42399-41-7	800	0.125	Non-hepatocarcinogen
Diltiazem	DIL	42399-41-7	800	0.25	Non-hepatocarcinogen
Diltiazem	DIL	42399-41-7	800	0.375	Non-hepatocarcinogen
Diltiazem	DIL	42399-41-7	800	1	Non-hepatocarcinogen
Diltiazem	DIL	42399-41-7	800	4	Non-hepatocarcinogen
Diltiazem	DIL	42399-41-7	800	8	Non-hepatocarcinogen
Diltiazem	DIL	42399-41-7	800	15	Non-hepatocarcinogen
Diltiazem	DIL	42399-41-7	800	29	Non-hepatocarcinogen
Disopyramide	DIS	3737-09-05	40	0.125	Non-hepatocarcinogen
Disopyramide	DIS	3737-09-05	40	0.25	Non-hepatocarcinogen
Disopyramide	DIS	3737-09-05	40	0.375	Non-hepatocarcinogen
Disopyramide	DIS	3737-09-05	40	1	Non-hepatocarcinogen
Disopyramide	DIS	3737-09-05	40	4	Non-hepatocarcinogen
Disopyramide	DIS	3737-09-05	40	8	Non-hepatocarcinogen
Disopyramide	DIS	3737-09-05	40	15	Non-hepatocarcinogen
Disopyramide	DIS	3737-09-05	40	29	Non-hepatocarcinogen
Disopyramide	DIS	3737-09-05	120	0.125	Non-hepatocarcinogen
Disopyramide	DIS	3737-09-05	120	0.25	Non-hepatocarcinogen
Disopyramide	DIS	3737-09-05	120	0.375	Non-hepatocarcinogen
Disopyramide	DIS	3737-09-05	120	1	Non-hepatocarcinogen
Disopyramide	DIS	3737-09-05	120	4	Non-hepatocarcinogen
Disopyramide	DIS	3737-09-05	120	8	Non-hepatocarcinogen
Disopyramide	DIS	3737-09-05	120	15	Non-hepatocarcinogen
Disopyramide	DIS	3737-09-05	120	29	Non-hepatocarcinogen
Disopyramide	DIS	3737-09-05	400	0.125	Non-hepatocarcinogen
Disopyramide	DIS	3737-09-05	400	0.25	Non-hepatocarcinogen
Disopyramide	DIS	3737-09-05	400	0.375	Non-hepatocarcinogen
Disopyramide	DIS	3737-09-05	400	1	Non-hepatocarcinogen
Disopyramide	DIS	3737-09-05	400	4	Non-hepatocarcinogen
Disopyramide	DIS	3737-09-05	400	8	Non-hepatocarcinogen
Disopyramide	DIS	3737-09-05	400	15	Non-hepatocarcinogen
Disopyramide	DIS	3737-09-05	400	29	Non-hepatocarcinogen
Disulfiram	DSF	97-77-8	60	0.125	Non-hepatocarcinogen
Disulfiram	DSF	97-77-8	60	0.25	Non-hepatocarcinogen
Disulfiram	DSF	97-77-8	60	0.375	Non-hepatocarcinogen
Disulfiram	DSF	97-77-8	60	1	Non-hepatocarcinogen
Disulfiram	DSF	97-77-8	60	4	Non-hepatocarcinogen
Disulfiram	DSF	97-77-8	60	8	Non-hepatocarcinogen
Disulfiram	DSF	97-77-8	60	15	Non-hepatocarcinogen
Disulfiram	DSF	97-77-8	60	29	Non-hepatocarcinogen
Disulfiram	DSF	97-77-8	200	0.125	Non-hepatocarcinogen
Disulfiram	DSF	97-77-8	200	0.25	Non-hepatocarcinogen
Disulfiram	DSF	97-77-8	200	0.375	Non-hepatocarcinogen
Disulfiram	DSF	97-77-8	200	1	Non-hepatocarcinogen
Disulfiram	DSF	97-77-8	200	4	Non-hepatocarcinogen
Disulfiram	DSF	97-77-8	200	8	Non-hepatocarcinogen
Disulfiram	DSF	97-77-8	200	15	Non-hepatocarcinogen
Disulfiram	DSF	97-77-8	200	29	Non-hepatocarcinogen
Disulfiram	DSF	97-77-8	600	0.125	Non-hepatocarcinogen
Disulfiram	DSF	97-77-8	600	0.25	Non-hepatocarcinogen
Disulfiram	DSF	97-77-8	600	0.375	Non-hepatocarcinogen
Disulfiram	DSF	97-77-8	600	1	Non-hepatocarcinogen
Disulfiram	DSF	97-77-8	600	4	Non-hepatocarcinogen
Disulfiram	DSF	97-77-8	600	8	Non-hepatocarcinogen
Disulfiram	DSF	97-77-8	600	15	Non-hepatocarcinogen
Disulfiram	DSF	97-77-8	600	29	Non-hepatocarcinogen
Doxorubicin	DOX	23214-92-8	0.1	4	Non-hepatocarcinogen
Doxorubicin	DOX	23214-92-8	0.1	29	Non-hepatocarcinogen
Doxorubicin	DOX	23214-92-8	0.3	4	Non-hepatocarcinogen
Doxorubicin	DOX	23214-92-8	0.3	8	Non-hepatocarcinogen
Doxorubicin	DOX	23214-92-8	0.3	15	Non-hepatocarcinogen
Doxorubicin	DOX	23214-92-8	0.3	29	Non-hepatocarcinogen
Doxorubicin	DOX	23214-92-8	0.65	0.25	Non-hepatocarcinogen
Doxorubicin	DOX	23214-92-8	0.65	1	Non-hepatocarcinogen
Doxorubicin	DOX	23214-92-8	0.65	3	Non-hepatocarcinogen
Doxorubicin	DOX	23214-92-8	1	0.125	Non-hepatocarcinogen
Doxorubicin	DOX	23214-92-8	1	0.375	Non-hepatocarcinogen
Doxorubicin	DOX	23214-92-8	1	1	Non-hepatocarcinogen
Doxorubicin	DOX	23214-92-8	1	8	Non-hepatocarcinogen
Doxorubicin	DOX	23214-92-8	1	15	Non-hepatocarcinogen
Doxorubicin	DOX	23214-92-8	1	29	Non-hepatocarcinogen
Doxorubicin	DOX	23214-92-8	3	0.125	Non-hepatocarcinogen
Doxorubicin	DOX	23214-92-8	3	0.375	Non-hepatocarcinogen
Doxorubicin	DOX	23214-92-8	3	1	Non-hepatocarcinogen
Doxorubicin	DOX	23214-92-8	3	1	Non-hepatocarcinogen
Doxorubicin	DOX	23214-92-8	3	5	Non-hepatocarcinogen
Doxorubicin	DOX	23214-92-8	10	0.125	Non-hepatocarcinogen
Doxorubicin	DOX	23214-92-8	10	0.25	Non-hepatocarcinogen
Doxorubicin	DOX	23214-92-8	10	0.375	Non-hepatocarcinogen
Doxorubicin	DOX	23214-92-8	10	1	Non-hepatocarcinogen
Enalapril	ENA	75847-73-3	60	0.125	Non-hepatocarcinogen
Enalapril	ENA	75847-73-3	60	0.25	Non-hepatocarcinogen
Enalapril	ENA	75847-73-3	60	0.375	Non-hepatocarcinogen
Enalapril	ENA	75847-73-3	60	1	Non-hepatocarcinogen
Enalapril	ENA	75847-73-3	60	4	Non-hepatocarcinogen
Enalapril	ENA	75847-73-3	60	8	Non-hepatocarcinogen
Enalapril	ENA	75847-73-3	60	15	Non-hepatocarcinogen
Enalapril	ENA	75847-73-3	60	29	Non-hepatocarcinogen
Enalapril	ENA	75847-73-3	200	0.125	Non-hepatocarcinogen
Enalapril	ENA	75847-73-3	200	0.25	Non-hepatocarcinogen
Enalapril	ENA	75847-73-3	200	0.375	Non-hepatocarcinogen
Enalapril	ENA	75847-73-3	200	1	Non-hepatocarcinogen
Enalapril	ENA	75847-73-3	200	4	Non-hepatocarcinogen
Enalapril	ENA	75847-73-3	200	8	Non-hepatocarcinogen
Enalapril	ENA	75847-73-3	200	15	Non-hepatocarcinogen
Enalapril	ENA	75847-73-3	200	29	Non-hepatocarcinogen
Enalapril	ENA	75847-73-3	600	0.125	Non-hepatocarcinogen
Enalapril	ENA	75847-73-3	600	0.25	Non-hepatocarcinogen
Enalapril	ENA	75847-73-3	600	0.375	Non-hepatocarcinogen
Enalapril	ENA	75847-73-3	600	1	Non-hepatocarcinogen
Enalapril	ENA	75847-73-3	600	4	Non-hepatocarcinogen
Enalapril	ENA	75847-73-3	600	8	Non-hepatocarcinogen
Enalapril	ENA	75847-73-3	600	15	Non-hepatocarcinogen
Enalapril	ENA	75847-73-3	600	29	Non-hepatocarcinogen
Erythromycin Ethylsuccinate	EME	1264-62-6	100	0.125	Non-hepatocarcinogen
Erythromycin Ethylsuccinate	EME	1264-62-6	100	0.25	Non-hepatocarcinogen
Erythromycin Ethylsuccinate	EME	1264-62-6	100	0.375	Non-hepatocarcinogen
Erythromycin Ethylsuccinate	EME	1264-62-6	100	1	Non-hepatocarcinogen
Erythromycin Ethylsuccinate	EME	1264-62-6	100	4	Non-hepatocarcinogen
Erythromycin Ethylsuccinate	EME	1264-62-6	100	8	Non-hepatocarcinogen
Erythromycin Ethylsuccinate	EME	1264-62-6	100	15	Non-hepatocarcinogen
Erythromycin Ethylsuccinate	EME	1264-62-6	100	29	Non-hepatocarcinogen
Erythromycin Ethylsuccinate	EME	1264-62-6	300	0.125	Non-hepatocarcinogen
Erythromycin Ethylsuccinate	EME	1264-62-6	300	0.25	Non-hepatocarcinogen
Erythromycin Ethylsuccinate	EME	1264-62-6	300	0.375	Non-hepatocarcinogen
Erythromycin Ethylsuccinate	EME	1264-62-6	300	1	Non-hepatocarcinogen
Erythromycin Ethylsuccinate	EME	1264-62-6	300	4	Non-hepatocarcinogen
Erythromycin Ethylsuccinate	EME	1264-62-6	300	8	Non-hepatocarcinogen
Erythromycin Ethylsuccinate	EME	1264-62-6	300	15	Non-hepatocarcinogen
Erythromycin Ethylsuccinate	EME	1264-62-6	300	29	Non-hepatocarcinogen
Erythromycin Ethylsuccinate	EME	1264-62-6	1000	0.125	Non-hepatocarcinogen
Erythromycin Ethylsuccinate	EME	1264-62-6	1000	0.25	Non-hepatocarcinogen
Erythromycin Ethylsuccinate	EME	1264-62-6	1000	0.375	Non-hepatocarcinogen
Erythromycin Ethylsuccinate	EME	1264-62-6	1000	1	Non-hepatocarcinogen
Erythromycin Ethylsuccinate	EME	1264-62-6	1000	4	Non-hepatocarcinogen
Erythromycin Ethylsuccinate	EME	1264-62-6	1000	8	Non-hepatocarcinogen
Erythromycin Ethylsuccinate	EME	1264-62-6	1000	15	Non-hepatocarcinogen
Erythromycin Ethylsuccinate	EME	1264-62-6	1000	29	Non-hepatocarcinogen
Ethambutol	EBU	74-55-5	100	0.125	Non-hepatocarcinogen
Ethambutol	EBU	74-55-5	100	0.25	Non-hepatocarcinogen
Ethambutol	EBU	74-55-5	100	0.375	Non-hepatocarcinogen
Ethambutol	EBU	74-55-5	100	1	Non-hepatocarcinogen
Ethambutol	EBU	74-55-5	100	4	Non-hepatocarcinogen
Ethambutol	EBU	74-55-5	100	8	Non-hepatocarcinogen
Ethambutol	EBU	74-55-5	100	15	Non-hepatocarcinogen
Ethambutol	EBU	74-55-5	100	29	Non-hepatocarcinogen
Ethambutol	EBU	74-55-5	300	0.125	Non-hepatocarcinogen
Ethambutol	EBU	74-55-5	300	0.25	Non-hepatocarcinogen
Ethambutol	EBU	74-55-5	300	0.375	Non-hepatocarcinogen
Ethambutol	EBU	74-55-5	300	1	Non-hepatocarcinogen
Ethambutol	EBU	74-55-5	300	4	Non-hepatocarcinogen
Ethambutol	EBU	74-55-5	300	8	Non-hepatocarcinogen
Ethambutol	EBU	74-55-5	300	15	Non-hepatocarcinogen
Ethambutol	EBU	74-55-5	300	29	Non-hepatocarcinogen
Ethambutol	EBU	74-55-5	1000	0.125	Non-hepatocarcinogen
Ethambutol	EBU	74-55-5	1000	0.25	Non-hepatocarcinogen
Ethambutol	EBU	74-55-5	1000	0.375	Non-hepatocarcinogen
Ethambutol	EBU	74-55-5	1000	1	Non-hepatocarcinogen
Ethambutol	EBU	74-55-5	1000	4	Non-hepatocarcinogen
Ethambutol	EBU	74-55-5	1000	8	Non-hepatocarcinogen
Ethambutol	EBU	74-55-5	1000	15	Non-hepatocarcinogen
Ethambutol	EBU	74-55-5	1000	29	Non-hepatocarcinogen
Ethanol	ETN	64-17-5	400	0.125	Nongenotoxic carcinogen
Ethanol	ETN	64-17-5	400	0.25	Nongenotoxic carcinogen
Ethanol	ETN	64-17-5	400	1	Nongenotoxic carcinogen
Ethanol	ETN	64-17-5	400	4	Nongenotoxic carcinogen
Ethanol	ETN	64-17-5	400	8	Nongenotoxic carcinogen
Ethanol	ETN	64-17-5	400	15	Nongenotoxic carcinogen
Ethanol	ETN	64-17-5	400	29	Nongenotoxic carcinogen
Ethanol	ETN	64-17-5	1200	0.125	Nongenotoxic carcinogen
Ethanol	ETN	64-17-5	1200	0.25	Nongenotoxic carcinogen
Ethanol	ETN	64-17-5	1200	0.375	Nongenotoxic carcinogen
Ethanol	ETN	64-17-5	1200	1	Nongenotoxic carcinogen
Ethanol	ETN	64-17-5	1200	4	Nongenotoxic carcinogen
Ethanol	ETN	64-17-5	1200	8	Nongenotoxic carcinogen
Ethanol	ETN	64-17-5	1200	15	Nongenotoxic carcinogen
Ethanol	ETN	64-17-5	1200	29	Nongenotoxic carcinogen
Ethanol	ETN	64-17-5	4000	0.125	Nongenotoxic carcinogen
Ethanol	ETN	64-17-5	4000	0.25	Nongenotoxic carcinogen
Ethanol	ETN	64-17-5	4000	0.375	Nongenotoxic carcinogen
Ethanol	ETN	64-17-5	4000	1	Nongenotoxic carcinogen
Ethanol	ETN	64-17-5	4000	4	Nongenotoxic carcinogen
Ethanol	ETN	64-17-5	4000	8	Nongenotoxic carcinogen
Ethanol	ETN	64-17-5	4000	15	Nongenotoxic carcinogen
Ethanol	ETN	64-17-5	4000	29	Nongenotoxic carcinogen
Ethanol	ETN	64-17-5	6000	0.25	Nongenotoxic carcinogen
Ethinylestradiol	EE	57-63-6	1	0.375	Nongenotoxic carcinogen
Ethinylestradiol	EE	57-63-6	1	4	Nongenotoxic carcinogen
Ethinylestradiol	EE	57-63-6	1	15	Nongenotoxic carcinogen
Ethinylestradiol	EE	57-63-6	1	29	Nongenotoxic carcinogen
Ethinylestradiol	EE	57-63-6	3	0.125	Nongenotoxic carcinogen
Ethinylestradiol	EE	57-63-6	3	0.25	Nongenotoxic carcinogen
Ethinylestradiol	EE	57-63-6	3	0.375	Nongenotoxic carcinogen
Ethinylestradiol	EE	57-63-6	3	4	Nongenotoxic carcinogen
Ethinylestradiol	EE	57-63-6	3	8	Nongenotoxic carcinogen
Ethinylestradiol	EE	57-63-6	3	15	Nongenotoxic carcinogen
Ethinylestradiol	EE	57-63-6	10	0.25	Nongenotoxic carcinogen
Ethinylestradiol	EE	57-63-6	10	0.375	Nongenotoxic carcinogen
Ethinylestradiol	EE	57-63-6	10	1	Nongenotoxic carcinogen
Ethinylestradiol	EE	57-63-6	10	1	Nongenotoxic carcinogen
Ethinylestradiol	EE	57-63-6	10	3	Nongenotoxic carcinogen
Ethinylestradiol	EE	57-63-6	10	4	Nongenotoxic carcinogen
Ethinylestradiol	EE	57-63-6	10	5	Nongenotoxic carcinogen
Ethinylestradiol	EE	57-63-6	10	8	Nongenotoxic carcinogen
Ethinylestradiol	EE	57-63-6	10	15	Nongenotoxic carcinogen
Ethinylestradiol	EE	57-63-6	10	29	Nongenotoxic carcinogen
Ethinylestradiol	EE	57-63-6	1480	0.25	Nongenotoxic carcinogen
Ethinylestradiol	EE	57-63-6	1480	1	Nongenotoxic carcinogen
Ethinylestradiol	EE	57-63-6	1480	3	Nongenotoxic carcinogen
Ethinylestradiol	EE	57-63-6	1480	5	Nongenotoxic carcinogen
Ethionamide	ETH	536-33-4	30	4	Non-hepatocarcinogen
Ethionamide	ETH	536-33-4	30	8	Non-hepatocarcinogen
Ethionamide	ETH	536-33-4	30	15	Non-hepatocarcinogen
Ethionamide	ETH	536-33-4	30	29	Non-hepatocarcinogen
Ethionamide	ETH	536-33-4	100	0.125	Non-hepatocarcinogen
Ethionamide	ETH	536-33-4	100	0.25	Non-hepatocarcinogen
Ethionamide	ETH	536-33-4	100	0.375	Non-hepatocarcinogen
Ethionamide	ETH	536-33-4	100	1	Non-hepatocarcinogen
Ethionamide	ETH	536-33-4	100	4	Non-hepatocarcinogen
Ethionamide	ETH	536-33-4	100	8	Non-hepatocarcinogen
Ethionamide	ETH	536-33-4	100	15	Non-hepatocarcinogen
Ethionamide	ETH	536-33-4	100	29	Non-hepatocarcinogen
Ethionamide	ETH	536-33-4	300	0.125	Non-hepatocarcinogen
Ethionamide	ETH	536-33-4	300	0.25	Non-hepatocarcinogen
Ethionamide	ETH	536-33-4	300	0.375	Non-hepatocarcinogen
Ethionamide	ETH	536-33-4	300	1	Non-hepatocarcinogen
Ethionamide	ETH	536-33-4	300	4	Non-hepatocarcinogen
Ethionamide	ETH	536-33-4	300	8	Non-hepatocarcinogen
Ethionamide	ETH	536-33-4	300	15	Non-hepatocarcinogen
Ethionamide	ETH	536-33-4	1000	0.125	Non-hepatocarcinogen
Ethionamide	ETH	536-33-4	1000	0.25	Non-hepatocarcinogen
Ethionamide	ETH	536-33-4	1000	0.375	Non-hepatocarcinogen
Ethionamide	ETH	536-33-4	1000	1	Non-hepatocarcinogen
Ethionine	ET	13073-35-3	25	0.125	Nongenotoxic carcinogen
Ethionine	ET	13073-35-3	25	0.25	Nongenotoxic carcinogen
Ethionine	ET	13073-35-3	25	0.375	Nongenotoxic carcinogen
Ethionine	ET	13073-35-3	25	1	Nongenotoxic carcinogen
Ethionine	ET	13073-35-3	25	4	Nongenotoxic carcinogen
Ethionine	ET	13073-35-3	25	8	Nongenotoxic carcinogen
Ethionine	ET	13073-35-3	25	15	Nongenotoxic carcinogen
Ethionine	ET	13073-35-3	25	29	Nongenotoxic carcinogen
Ethionine	ET	13073-35-3	80	0.125	Nongenotoxic carcinogen
Ethionine	ET	13073-35-3	80	0.25	Nongenotoxic carcinogen
Ethionine	ET	13073-35-3	80	0.375	Nongenotoxic carcinogen
Ethionine	ET	13073-35-3	80	1	Nongenotoxic carcinogen
Ethionine	ET	13073-35-3	80	4	Nongenotoxic carcinogen
Ethionine	ET	13073-35-3	80	8	Nongenotoxic carcinogen
Ethionine	ET	13073-35-3	80	15	Nongenotoxic carcinogen
Ethionine	ET	13073-35-3	80	29	Nongenotoxic carcinogen
Ethionine	ET	13073-35-3	250	0.125	Nongenotoxic carcinogen
Ethionine	ET	13073-35-3	250	0.25	Nongenotoxic carcinogen
Ethionine	ET	13073-35-3	250	0.375	Nongenotoxic carcinogen
Ethionine	ET	13073-35-3	250	1	Nongenotoxic carcinogen
Ethionine	ET	13073-35-3	250	4	Nongenotoxic carcinogen
Ethionine	ET	13073-35-3	250	8	Nongenotoxic carcinogen
Ethionine	ET	13073-35-3	250	15	Nongenotoxic carcinogen
Ethionine	ET	13073-35-3	250	29	Nongenotoxic carcinogen
Etoposide	ETP	33419-42-0	3	4	Unknwon
Etoposide	ETP	33419-42-0	3	8	Unknwon
Etoposide	ETP	33419-42-0	3	15	Unknwon
Etoposide	ETP	33419-42-0	3	29	Unknwon
Etoposide	ETP	33419-42-0	10	0.125	Unknwon
Etoposide	ETP	33419-42-0	10	0.25	Unknwon
Etoposide	ETP	33419-42-0	10	0.375	Unknwon
Etoposide	ETP	33419-42-0	10	1	Unknwon
Etoposide	ETP	33419-42-0	10	4	Unknwon
Etoposide	ETP	33419-42-0	10	8	Unknwon
Etoposide	ETP	33419-42-0	10	15	Unknwon
Etoposide	ETP	33419-42-0	10	29	Unknwon
Etoposide	ETP	33419-42-0	30	4	Unknwon
Etoposide	ETP	33419-42-0	30	8	Unknwon
Etoposide	ETP	33419-42-0	30	15	Unknwon
Etoposide	ETP	33419-42-0	30	29	Unknwon
Etoposide	ETP	33419-42-0	100	0.125	Unknwon
Etoposide	ETP	33419-42-0	100	0.25	Unknwon
Etoposide	ETP	33419-42-0	100	0.375	Unknwon
Etoposide	ETP	33419-42-0	100	1	Unknwon
Etoposide	ETP	33419-42-0	1000	0.125	Unknwon
Etoposide	ETP	33419-42-0	1000	0.25	Unknwon
Etoposide	ETP	33419-42-0	1000	0.375	Unknwon
Etoposide	ETP	33419-42-0	1000	1	Unknwon
Famotidine	FAM	76824-35-6	100	0.125	Non-hepatocarcinogen
Famotidine	FAM	76824-35-6	100	0.25	Non-hepatocarcinogen
Famotidine	FAM	76824-35-6	100	0.375	Non-hepatocarcinogen
Famotidine	FAM	76824-35-6	100	1	Non-hepatocarcinogen
Famotidine	FAM	76824-35-6	100	4	Non-hepatocarcinogen
Famotidine	FAM	76824-35-6	100	8	Non-hepatocarcinogen
Famotidine	FAM	76824-35-6	100	15	Non-hepatocarcinogen
Famotidine	FAM	76824-35-6	100	29	Non-hepatocarcinogen
Famotidine	FAM	76824-35-6	300	0.125	Non-hepatocarcinogen
Famotidine	FAM	76824-35-6	300	0.25	Non-hepatocarcinogen
Famotidine	FAM	76824-35-6	300	0.375	Non-hepatocarcinogen
Famotidine	FAM	76824-35-6	300	1	Non-hepatocarcinogen
Famotidine	FAM	76824-35-6	300	4	Non-hepatocarcinogen
Famotidine	FAM	76824-35-6	300	8	Non-hepatocarcinogen
Famotidine	FAM	76824-35-6	300	15	Non-hepatocarcinogen
Famotidine	FAM	76824-35-6	300	29	Non-hepatocarcinogen
Famotidine	FAM	76824-35-6	1000	0.125	Non-hepatocarcinogen
Famotidine	FAM	76824-35-6	1000	0.25	Non-hepatocarcinogen
Famotidine	FAM	76824-35-6	1000	0.375	Non-hepatocarcinogen
Famotidine	FAM	76824-35-6	1000	1	Non-hepatocarcinogen
Famotidine	FAM	76824-35-6	1000	4	Non-hepatocarcinogen
Famotidine	FAM	76824-35-6	1000	8	Non-hepatocarcinogen
Famotidine	FAM	76824-35-6	1000	15	Non-hepatocarcinogen
Famotidine	FAM	76824-35-6	1000	29	Non-hepatocarcinogen
Fenofibrate	FFB	49562-28-9	10	0.125	Nongenotoxic carcinogen
Fenofibrate	FFB	49562-28-9	10	0.25	Nongenotoxic carcinogen
Fenofibrate	FFB	49562-28-9	10	0.375	Nongenotoxic carcinogen
Fenofibrate	FFB	49562-28-9	10	1	Nongenotoxic carcinogen
Fenofibrate	FFB	49562-28-9	10	4	Nongenotoxic carcinogen
Fenofibrate	FFB	49562-28-9	10	15	Nongenotoxic carcinogen
Fenofibrate	FFB	49562-28-9	43	0.25	Nongenotoxic carcinogen
Fenofibrate	FFB	49562-28-9	43	1	Nongenotoxic carcinogen
Fenofibrate	FFB	49562-28-9	43	5	Nongenotoxic carcinogen
Fenofibrate	FFB	49562-28-9	100	0.25	Nongenotoxic carcinogen
Fenofibrate	FFB	49562-28-9	100	1	Nongenotoxic carcinogen
Fenofibrate	FFB	49562-28-9	100	4	Nongenotoxic carcinogen
Fenofibrate	FFB	49562-28-9	100	8	Nongenotoxic carcinogen
Fenofibrate	FFB	49562-28-9	100	15	Nongenotoxic carcinogen
Fenofibrate	FFB	49562-28-9	100	29	Nongenotoxic carcinogen
Fenofibrate	FFB	49562-28-9	215	0.25	Nongenotoxic carcinogen
Fenofibrate	FFB	49562-28-9	215	1	Nongenotoxic carcinogen
Fenofibrate	FFB	49562-28-9	215	5	Nongenotoxic carcinogen
Fenofibrate	FFB	49562-28-9	430	5	Nongenotoxic carcinogen
Fenofibrate	FFB	49562-28-9	1000	0.125	Nongenotoxic carcinogen
Fenofibrate	FFB	49562-28-9	1000	0.25	Nongenotoxic carcinogen
Fenofibrate	FFB	49562-28-9	1000	0.375	Nongenotoxic carcinogen
Fenofibrate	FFB	49562-28-9	1000	1	Nongenotoxic carcinogen
Fenofibrate	FFB	49562-28-9	1000	8	Nongenotoxic carcinogen
Fluoxetine Hydrochloride	FLX	56296-78-7	3	0.125	Unknwon
Fluoxetine Hydrochloride	FLX	56296-78-7	3	0.25	Unknwon
Fluoxetine Hydrochloride	FLX	56296-78-7	3	0.375	Unknwon
Fluoxetine Hydrochloride	FLX	56296-78-7	3	1	Unknwon
Fluoxetine Hydrochloride	FLX	56296-78-7	3	4	Unknwon
Fluoxetine Hydrochloride	FLX	56296-78-7	3	8	Unknwon
Fluoxetine Hydrochloride	FLX	56296-78-7	3	15	Unknwon
Fluoxetine Hydrochloride	FLX	56296-78-7	3	29	Unknwon
Fluoxetine Hydrochloride	FLX	56296-78-7	10	0.125	Unknwon
Fluoxetine Hydrochloride	FLX	56296-78-7	10	0.25	Unknwon
Fluoxetine Hydrochloride	FLX	56296-78-7	10	0.375	Unknwon
Fluoxetine Hydrochloride	FLX	56296-78-7	10	1	Unknwon
Fluoxetine Hydrochloride	FLX	56296-78-7	10	4	Unknwon
Fluoxetine Hydrochloride	FLX	56296-78-7	10	8	Unknwon
Fluoxetine Hydrochloride	FLX	56296-78-7	10	15	Unknwon
Fluoxetine Hydrochloride	FLX	56296-78-7	10	29	Unknwon
Fluoxetine Hydrochloride	FLX	56296-78-7	30	0.125	Unknwon
Fluoxetine Hydrochloride	FLX	56296-78-7	30	0.25	Unknwon
Fluoxetine Hydrochloride	FLX	56296-78-7	30	0.375	Unknwon
Fluoxetine Hydrochloride	FLX	56296-78-7	30	1	Unknwon
Fluoxetine Hydrochloride	FLX	56296-78-7	30	4	Unknwon
Fluoxetine Hydrochloride	FLX	56296-78-7	30	8	Unknwon
Fluoxetine Hydrochloride	FLX	56296-78-7	30	15	Unknwon
Fluoxetine Hydrochloride	FLX	56296-78-7	30	29	Unknwon
Fluphenazine	FP	69-23-8	2	0.125	Non-hepatocarcinogen
Fluphenazine	FP	69-23-8	2	0.25	Non-hepatocarcinogen
Fluphenazine	FP	69-23-8	2	0.375	Non-hepatocarcinogen
Fluphenazine	FP	69-23-8	2	1	Non-hepatocarcinogen
Fluphenazine	FP	69-23-8	2	4	Non-hepatocarcinogen
Fluphenazine	FP	69-23-8	2	29	Non-hepatocarcinogen
Fluphenazine	FP	69-23-8	2.5	0.25	Non-hepatocarcinogen
Fluphenazine	FP	69-23-8	2.5	3	Non-hepatocarcinogen
Fluphenazine	FP	69-23-8	6	0.125	Non-hepatocarcinogen
Fluphenazine	FP	69-23-8	6	0.375	Non-hepatocarcinogen
Fluphenazine	FP	69-23-8	6	1	Non-hepatocarcinogen
Fluphenazine	FP	69-23-8	6	4	Non-hepatocarcinogen
Fluphenazine	FP	69-23-8	6	8	Non-hepatocarcinogen
Fluphenazine	FP	69-23-8	6	15	Non-hepatocarcinogen
Fluphenazine	FP	69-23-8	6	29	Non-hepatocarcinogen
Fluphenazine	FP	69-23-8	20	0.125	Non-hepatocarcinogen
Fluphenazine	FP	69-23-8	20	0.375	Non-hepatocarcinogen
Fluphenazine	FP	69-23-8	20	1	Non-hepatocarcinogen
Fluphenazine	FP	69-23-8	20	4	Non-hepatocarcinogen
Fluphenazine	FP	69-23-8	20	8	Non-hepatocarcinogen
Fluphenazine	FP	69-23-8	20	15	Non-hepatocarcinogen
Fluphenazine	FP	69-23-8	20	29	Non-hepatocarcinogen
Fluphenazine	FP	69-23-8	22	0.25	Non-hepatocarcinogen
Fluphenazine	FP	69-23-8	22	1	Non-hepatocarcinogen
Flutamide	FT	13311-84-7	15	0.125	Unknwon
Flutamide	FT	13311-84-7	15	0.25	Unknwon
Flutamide	FT	13311-84-7	15	0.375	Unknwon
Flutamide	FT	13311-84-7	15	1	Unknwon
Flutamide	FT	13311-84-7	15	4	Unknwon
Flutamide	FT	13311-84-7	15	8	Unknwon
Flutamide	FT	13311-84-7	15	15	Unknwon
Flutamide	FT	13311-84-7	15	29	Unknwon
Flutamide	FT	13311-84-7	50	0.125	Unknwon
Flutamide	FT	13311-84-7	50	0.25	Unknwon
Flutamide	FT	13311-84-7	50	0.375	Unknwon
Flutamide	FT	13311-84-7	50	1	Unknwon
Flutamide	FT	13311-84-7	50	4	Unknwon
Flutamide	FT	13311-84-7	50	8	Unknwon
Flutamide	FT	13311-84-7	50	15	Unknwon
Flutamide	FT	13311-84-7	50	29	Unknwon
Flutamide	FT	13311-84-7	150	0.125	Unknwon
Flutamide	FT	13311-84-7	150	0.25	Unknwon
Flutamide	FT	13311-84-7	150	0.375	Unknwon
Flutamide	FT	13311-84-7	150	1	Unknwon
Flutamide	FT	13311-84-7	150	4	Unknwon
Flutamide	FT	13311-84-7	150	8	Unknwon
Flutamide	FT	13311-84-7	150	15	Unknwon
Flutamide	FT	13311-84-7	150	29	Unknwon
Furosemide	FUR	54-31-9	30	0.125	Non-hepatocarcinogen
Furosemide	FUR	54-31-9	30	0.25	Non-hepatocarcinogen
Furosemide	FUR	54-31-9	30	0.375	Non-hepatocarcinogen
Furosemide	FUR	54-31-9	30	1	Non-hepatocarcinogen
Furosemide	FUR	54-31-9	30	4	Non-hepatocarcinogen
Furosemide	FUR	54-31-9	30	8	Non-hepatocarcinogen
Furosemide	FUR	54-31-9	30	15	Non-hepatocarcinogen
Furosemide	FUR	54-31-9	30	29	Non-hepatocarcinogen
Furosemide	FUR	54-31-9	100	0.125	Non-hepatocarcinogen
Furosemide	FUR	54-31-9	100	0.25	Non-hepatocarcinogen
Furosemide	FUR	54-31-9	100	0.375	Non-hepatocarcinogen
Furosemide	FUR	54-31-9	100	1	Non-hepatocarcinogen
Furosemide	FUR	54-31-9	100	4	Non-hepatocarcinogen
Furosemide	FUR	54-31-9	100	8	Non-hepatocarcinogen
Furosemide	FUR	54-31-9	100	15	Non-hepatocarcinogen
Furosemide	FUR	54-31-9	100	29	Non-hepatocarcinogen
Furosemide	FUR	54-31-9	300	0.125	Non-hepatocarcinogen
Furosemide	FUR	54-31-9	300	0.25	Non-hepatocarcinogen
Furosemide	FUR	54-31-9	300	0.375	Non-hepatocarcinogen
Furosemide	FUR	54-31-9	300	1	Non-hepatocarcinogen
Furosemide	FUR	54-31-9	300	4	Non-hepatocarcinogen
Furosemide	FUR	54-31-9	300	8	Non-hepatocarcinogen
Furosemide	FUR	54-31-9	300	15	Non-hepatocarcinogen
Furosemide	FUR	54-31-9	300	29	Non-hepatocarcinogen
Galactosamine	GaN	7535-00-4	100	0.125	Unknwon
Galactosamine	GaN	7535-00-4	100	0.25	Unknwon
Galactosamine	GaN	7535-00-4	100	0.375	Unknwon
Galactosamine	GaN	7535-00-4	100	1	Unknwon
Galactosamine	GaN	7535-00-4	300	0.125	Unknwon
Galactosamine	GaN	7535-00-4	300	0.25	Unknwon
Galactosamine	GaN	7535-00-4	300	0.375	Unknwon
Galactosamine	GaN	7535-00-4	300	1	Unknwon
Galactosamine	GaN	7535-00-4	1000	0.125	Unknwon
Galactosamine	GaN	7535-00-4	1000	0.25	Unknwon
Galactosamine	GaN	7535-00-4	1000	0.375	Unknwon
Galactosamine	GaN	7535-00-4	1000	1	Unknwon
Gefitinib	GEF	184475-35-2	58	1	Unknwon
Gefitinib	GEF	184475-35-2	58	3	Unknwon
Gefitinib	GEF	184475-35-2	58	5	Unknwon
Gefitinib	GEF	184475-35-2	116	3	Unknwon
Gefitinib	GEF	184475-35-2	200	0.125	Unknwon
Gefitinib	GEF	184475-35-2	200	0.25	Unknwon
Gefitinib	GEF	184475-35-2	200	1	Unknwon
Gefitinib	GEF	184475-35-2	600	0.125	Unknwon
Gefitinib	GEF	184475-35-2	600	0.375	Unknwon
Gefitinib	GEF	184475-35-2	600	1	Unknwon
Gefitinib	GEF	184475-35-2	2000	0.25	Unknwon
Gefitinib	GEF	184475-35-2	2000	1	Unknwon
Gemfibrozil	GFZ	25812-30-0	30	0.125	Nongenotoxic carcinogen
Gemfibrozil	GFZ	25812-30-0	30	0.25	Nongenotoxic carcinogen
Gemfibrozil	GFZ	25812-30-0	30	0.375	Nongenotoxic carcinogen
Gemfibrozil	GFZ	25812-30-0	30	1	Nongenotoxic carcinogen
Gemfibrozil	GFZ	25812-30-0	30	4	Nongenotoxic carcinogen
Gemfibrozil	GFZ	25812-30-0	30	15	Nongenotoxic carcinogen
Gemfibrozil	GFZ	25812-30-0	30	29	Nongenotoxic carcinogen
Gemfibrozil	GFZ	25812-30-0	100	0.125	Nongenotoxic carcinogen
Gemfibrozil	GFZ	25812-30-0	100	0.25	Nongenotoxic carcinogen
Gemfibrozil	GFZ	25812-30-0	100	0.375	Nongenotoxic carcinogen
Gemfibrozil	GFZ	25812-30-0	100	1	Nongenotoxic carcinogen
Gemfibrozil	GFZ	25812-30-0	100	3	Nongenotoxic carcinogen
Gemfibrozil	GFZ	25812-30-0	100	4	Nongenotoxic carcinogen
Gemfibrozil	GFZ	25812-30-0	100	7	Nongenotoxic carcinogen
Gemfibrozil	GFZ	25812-30-0	100	29	Nongenotoxic carcinogen
Gemfibrozil	GFZ	25812-30-0	300	0.125	Nongenotoxic carcinogen
Gemfibrozil	GFZ	25812-30-0	300	1	Nongenotoxic carcinogen
Gemfibrozil	GFZ	25812-30-0	300	8	Nongenotoxic carcinogen
Gemfibrozil	GFZ	25812-30-0	300	15	Nongenotoxic carcinogen
Gemfibrozil	GFZ	25812-30-0	300	29	Nongenotoxic carcinogen
Gemfibrozil	GFZ	25812-30-0	700	0.25	Nongenotoxic carcinogen
Gemfibrozil	GFZ	25812-30-0	700	1	Nongenotoxic carcinogen
Gemfibrozil	GFZ	25812-30-0	700	3	Nongenotoxic carcinogen
Gemfibrozil	GFZ	25812-30-0	700	7	Nongenotoxic carcinogen
Gentamicin	GMC	1403-66-3	10	0.125	Non-hepatocarcinogen
Gentamicin	GMC	1403-66-3	10	0.25	Non-hepatocarcinogen
Gentamicin	GMC	1403-66-3	10	0.375	Non-hepatocarcinogen
Gentamicin	GMC	1403-66-3	10	1	Non-hepatocarcinogen
Gentamicin	GMC	1403-66-3	10	8	Non-hepatocarcinogen
Gentamicin	GMC	1403-66-3	10	15	Non-hepatocarcinogen
Gentamicin	GMC	1403-66-3	10	29	Non-hepatocarcinogen
Gentamicin	GMC	1403-66-3	30	0.125	Non-hepatocarcinogen
Gentamicin	GMC	1403-66-3	30	0.25	Non-hepatocarcinogen
Gentamicin	GMC	1403-66-3	30	0.375	Non-hepatocarcinogen
Gentamicin	GMC	1403-66-3	30	4	Non-hepatocarcinogen
Gentamicin	GMC	1403-66-3	30	8	Non-hepatocarcinogen
Gentamicin	GMC	1403-66-3	30	15	Non-hepatocarcinogen
Gentamicin	GMC	1403-66-3	30	29	Non-hepatocarcinogen
Gentamicin	GMC	1403-66-3	100	0.125	Non-hepatocarcinogen
Gentamicin	GMC	1403-66-3	100	0.25	Non-hepatocarcinogen
Gentamicin	GMC	1403-66-3	100	0.375	Non-hepatocarcinogen
Gentamicin	GMC	1403-66-3	100	1	Non-hepatocarcinogen
Gentamicin	GMC	1403-66-3	100	4	Non-hepatocarcinogen
Gentamicin	GMC	1403-66-3	100	8	Non-hepatocarcinogen
Gentamicin	GMC	1403-66-3	100	15	Non-hepatocarcinogen
Gentamicin	GMC	1403-66-3	100	29	Non-hepatocarcinogen
Gentamicin	GMC	1403-66-3	267	3	Non-hepatocarcinogen
Gentamicin	GMC	1403-66-3	267	5	Non-hepatocarcinogen
Glibenclamide	GBC	10238-21-8	100	0.125	Non-hepatocarcinogen
Glibenclamide	GBC	10238-21-8	100	0.25	Non-hepatocarcinogen
Glibenclamide	GBC	10238-21-8	100	0.375	Non-hepatocarcinogen
Glibenclamide	GBC	10238-21-8	100	1	Non-hepatocarcinogen
Glibenclamide	GBC	10238-21-8	100	4	Non-hepatocarcinogen
Glibenclamide	GBC	10238-21-8	100	8	Non-hepatocarcinogen
Glibenclamide	GBC	10238-21-8	100	15	Non-hepatocarcinogen
Glibenclamide	GBC	10238-21-8	100	29	Non-hepatocarcinogen
Glibenclamide	GBC	10238-21-8	300	0.125	Non-hepatocarcinogen
Glibenclamide	GBC	10238-21-8	300	0.25	Non-hepatocarcinogen
Glibenclamide	GBC	10238-21-8	300	0.375	Non-hepatocarcinogen
Glibenclamide	GBC	10238-21-8	300	1	Non-hepatocarcinogen
Glibenclamide	GBC	10238-21-8	300	4	Non-hepatocarcinogen
Glibenclamide	GBC	10238-21-8	300	8	Non-hepatocarcinogen
Glibenclamide	GBC	10238-21-8	300	15	Non-hepatocarcinogen
Glibenclamide	GBC	10238-21-8	300	29	Non-hepatocarcinogen
Glibenclamide	GBC	10238-21-8	1000	0.125	Non-hepatocarcinogen
Glibenclamide	GBC	10238-21-8	1000	0.25	Non-hepatocarcinogen
Glibenclamide	GBC	10238-21-8	1000	0.375	Non-hepatocarcinogen
Glibenclamide	GBC	10238-21-8	1000	1	Non-hepatocarcinogen
Glibenclamide	GBC	10238-21-8	1000	4	Non-hepatocarcinogen
Glibenclamide	GBC	10238-21-8	1000	8	Non-hepatocarcinogen
Glibenclamide	GBC	10238-21-8	1000	15	Non-hepatocarcinogen
Glibenclamide	GBC	10238-21-8	1000	29	Non-hepatocarcinogen
Griseofulvin	GF	126-07-08	100	0.125	Non-hepatocarcinogen
Griseofulvin	GF	126-07-08	100	0.25	Non-hepatocarcinogen
Griseofulvin	GF	126-07-08	100	0.375	Non-hepatocarcinogen
Griseofulvin	GF	126-07-08	100	1	Non-hepatocarcinogen
Griseofulvin	GF	126-07-08	100	4	Non-hepatocarcinogen
Griseofulvin	GF	126-07-08	100	8	Non-hepatocarcinogen
Griseofulvin	GF	126-07-08	100	15	Non-hepatocarcinogen
Griseofulvin	GF	126-07-08	100	29	Non-hepatocarcinogen
Griseofulvin	GF	126-07-08	300	0.125	Non-hepatocarcinogen
Griseofulvin	GF	126-07-08	300	0.25	Non-hepatocarcinogen
Griseofulvin	GF	126-07-08	300	0.375	Non-hepatocarcinogen
Griseofulvin	GF	126-07-08	300	1	Non-hepatocarcinogen
Griseofulvin	GF	126-07-08	300	4	Non-hepatocarcinogen
Griseofulvin	GF	126-07-08	300	8	Non-hepatocarcinogen
Griseofulvin	GF	126-07-08	300	15	Non-hepatocarcinogen
Griseofulvin	GF	126-07-08	300	29	Non-hepatocarcinogen
Griseofulvin	GF	126-07-08	1000	0.125	Non-hepatocarcinogen
Griseofulvin	GF	126-07-08	1000	0.25	Non-hepatocarcinogen
Griseofulvin	GF	126-07-08	1000	0.375	Non-hepatocarcinogen
Griseofulvin	GF	126-07-08	1000	1	Non-hepatocarcinogen
Griseofulvin	GF	126-07-08	1000	4	Non-hepatocarcinogen
Griseofulvin	GF	126-07-08	1000	8	Non-hepatocarcinogen
Griseofulvin	GF	126-07-08	1000	15	Non-hepatocarcinogen
Griseofulvin	GF	126-07-08	1000	29	Non-hepatocarcinogen
Haloperidol	HPL	52-86-8	3	0.125	Non-hepatocarcinogen
Haloperidol	HPL	52-86-8	3	0.25	Non-hepatocarcinogen
Haloperidol	HPL	52-86-8	3	0.375	Non-hepatocarcinogen
Haloperidol	HPL	52-86-8	3	1	Non-hepatocarcinogen
Haloperidol	HPL	52-86-8	3	4	Non-hepatocarcinogen
Haloperidol	HPL	52-86-8	3	8	Non-hepatocarcinogen
Haloperidol	HPL	52-86-8	3	15	Non-hepatocarcinogen
Haloperidol	HPL	52-86-8	3	29	Non-hepatocarcinogen
Haloperidol	HPL	52-86-8	10	0.125	Non-hepatocarcinogen
Haloperidol	HPL	52-86-8	10	0.25	Non-hepatocarcinogen
Haloperidol	HPL	52-86-8	10	0.375	Non-hepatocarcinogen
Haloperidol	HPL	52-86-8	10	1	Non-hepatocarcinogen
Haloperidol	HPL	52-86-8	10	4	Non-hepatocarcinogen
Haloperidol	HPL	52-86-8	10	8	Non-hepatocarcinogen
Haloperidol	HPL	52-86-8	10	15	Non-hepatocarcinogen
Haloperidol	HPL	52-86-8	10	29	Non-hepatocarcinogen
Haloperidol	HPL	52-86-8	30	0.125	Non-hepatocarcinogen
Haloperidol	HPL	52-86-8	30	0.25	Non-hepatocarcinogen
Haloperidol	HPL	52-86-8	30	0.375	Non-hepatocarcinogen
Haloperidol	HPL	52-86-8	30	1	Non-hepatocarcinogen
Haloperidol	HPL	52-86-8	30	4	Non-hepatocarcinogen
Haloperidol	HPL	52-86-8	30	8	Non-hepatocarcinogen
Haloperidol	HPL	52-86-8	30	15	Non-hepatocarcinogen
Haloperidol	HPL	52-86-8	30	29	Non-hepatocarcinogen
Hexachlorobenzene	HCB	118-74-1	30	4	Nongenotoxic carcinogen
Hexachlorobenzene	HCB	118-74-1	30	8	Nongenotoxic carcinogen
Hexachlorobenzene	HCB	118-74-1	30	15	Nongenotoxic carcinogen
Hexachlorobenzene	HCB	118-74-1	30	29	Nongenotoxic carcinogen
Hexachlorobenzene	HCB	118-74-1	100	4	Nongenotoxic carcinogen
Hexachlorobenzene	HCB	118-74-1	100	8	Nongenotoxic carcinogen
Hexachlorobenzene	HCB	118-74-1	100	15	Nongenotoxic carcinogen
Hexachlorobenzene	HCB	118-74-1	100	29	Nongenotoxic carcinogen
Hexachlorobenzene	HCB	118-74-1	300	0.125	Nongenotoxic carcinogen
Hexachlorobenzene	HCB	118-74-1	300	0.25	Nongenotoxic carcinogen
Hexachlorobenzene	HCB	118-74-1	300	0.375	Nongenotoxic carcinogen
Hexachlorobenzene	HCB	118-74-1	300	1	Nongenotoxic carcinogen
Hexachlorobenzene	HCB	118-74-1	300	4	Nongenotoxic carcinogen
Hexachlorobenzene	HCB	118-74-1	300	8	Nongenotoxic carcinogen
Hexachlorobenzene	HCB	118-74-1	300	15	Nongenotoxic carcinogen
Hexachlorobenzene	HCB	118-74-1	300	29	Nongenotoxic carcinogen
Hexachlorobenzene	HCB	118-74-1	1000	0.125	Nongenotoxic carcinogen
Hexachlorobenzene	HCB	118-74-1	1000	0.25	Nongenotoxic carcinogen
Hexachlorobenzene	HCB	118-74-1	1000	0.375	Nongenotoxic carcinogen
Hexachlorobenzene	HCB	118-74-1	1000	1	Nongenotoxic carcinogen
Hexachlorobenzene	HCB	118-74-1	2000	0.125	Nongenotoxic carcinogen
Hexachlorobenzene	HCB	118-74-1	2000	0.25	Nongenotoxic carcinogen
Hexachlorobenzene	HCB	118-74-1	2000	0.375	Nongenotoxic carcinogen
Hexachlorobenzene	HCB	118-74-1	2000	1	Nongenotoxic carcinogen
Hydroxyzine	HYZ	68-88-2	10	0.125	Unknwon
Hydroxyzine	HYZ	68-88-2	10	0.25	Unknwon
Hydroxyzine	HYZ	68-88-2	10	0.375	Unknwon
Hydroxyzine	HYZ	68-88-2	10	1	Unknwon
Hydroxyzine	HYZ	68-88-2	10	4	Unknwon
Hydroxyzine	HYZ	68-88-2	10	8	Unknwon
Hydroxyzine	HYZ	68-88-2	10	15	Unknwon
Hydroxyzine	HYZ	68-88-2	10	29	Unknwon
Hydroxyzine	HYZ	68-88-2	30	0.125	Unknwon
Hydroxyzine	HYZ	68-88-2	30	0.25	Unknwon
Hydroxyzine	HYZ	68-88-2	30	0.375	Unknwon
Hydroxyzine	HYZ	68-88-2	30	1	Unknwon
Hydroxyzine	HYZ	68-88-2	30	4	Unknwon
Hydroxyzine	HYZ	68-88-2	30	8	Unknwon
Hydroxyzine	HYZ	68-88-2	30	15	Unknwon
Hydroxyzine	HYZ	68-88-2	30	29	Unknwon
Hydroxyzine	HYZ	68-88-2	100	0.125	Unknwon
Hydroxyzine	HYZ	68-88-2	100	0.25	Unknwon
Hydroxyzine	HYZ	68-88-2	100	0.375	Unknwon
Hydroxyzine	HYZ	68-88-2	100	1	Unknwon
Hydroxyzine	HYZ	68-88-2	100	4	Unknwon
Hydroxyzine	HYZ	68-88-2	100	8	Unknwon
Hydroxyzine	HYZ	68-88-2	100	15	Unknwon
Hydroxyzine	HYZ	68-88-2	100	29	Unknwon
Ibuprofen	IBU	15687-27-1	20	4	Non-hepatocarcinogen
Ibuprofen	IBU	15687-27-1	20	8	Non-hepatocarcinogen
Ibuprofen	IBU	15687-27-1	20	15	Non-hepatocarcinogen
Ibuprofen	IBU	15687-27-1	60	0.125	Non-hepatocarcinogen
Ibuprofen	IBU	15687-27-1	60	0.25	Non-hepatocarcinogen
Ibuprofen	IBU	15687-27-1	60	0.375	Non-hepatocarcinogen
Ibuprofen	IBU	15687-27-1	60	1	Non-hepatocarcinogen
Ibuprofen	IBU	15687-27-1	60	8	Non-hepatocarcinogen
Ibuprofen	IBU	15687-27-1	60	15	Non-hepatocarcinogen
Ibuprofen	IBU	15687-27-1	60	29	Non-hepatocarcinogen
Ibuprofen	IBU	15687-27-1	200	0.125	Non-hepatocarcinogen
Ibuprofen	IBU	15687-27-1	200	0.375	Non-hepatocarcinogen
Ibuprofen	IBU	15687-27-1	200	1	Non-hepatocarcinogen
Ibuprofen	IBU	15687-27-1	200	4	Non-hepatocarcinogen
Ibuprofen	IBU	15687-27-1	200	8	Non-hepatocarcinogen
Ibuprofen	IBU	15687-27-1	200	15	Non-hepatocarcinogen
Ibuprofen	IBU	15687-27-1	200	29	Non-hepatocarcinogen
Ibuprofen	IBU	15687-27-1	263	1	Non-hepatocarcinogen
Ibuprofen	IBU	15687-27-1	263	3	Non-hepatocarcinogen
Ibuprofen	IBU	15687-27-1	263	5	Non-hepatocarcinogen
Ibuprofen	IBU	15687-27-1	400	0.125	Non-hepatocarcinogen
Ibuprofen	IBU	15687-27-1	400	0.25	Non-hepatocarcinogen
Ibuprofen	IBU	15687-27-1	400	0.375	Non-hepatocarcinogen
Ibuprofen	IBU	15687-27-1	400	1	Non-hepatocarcinogen
Imatinib, Methanesulfonate Salt	IMA	152459-95-5	15	1	Non-hepatocarcinogen
Imatinib, Methanesulfonate Salt	IMA	152459-95-5	60	0.25	Unknwon
Imatinib, Methanesulfonate Salt	IMA	152459-95-5	60	0.375	Unknwon
Imatinib, Methanesulfonate Salt	IMA	152459-95-5	60	1	Unknwon
Imatinib, Methanesulfonate Salt	IMA	152459-95-5	150	1	Non-hepatocarcinogen
Imatinib, Methanesulfonate Salt	IMA	152459-95-5	200	0.125	Unknwon
Imatinib, Methanesulfonate Salt	IMA	152459-95-5	200	0.25	Unknwon
Imatinib, Methanesulfonate Salt	IMA	152459-95-5	200	0.375	Unknwon
Imatinib, Methanesulfonate Salt	IMA	152459-95-5	200	1	Unknwon
Imatinib, Methanesulfonate Salt	IMA	152459-95-5	600	0.125	Unknwon
Imatinib, Methanesulfonate Salt	IMA	152459-95-5	600	0.25	Unknwon
Imatinib, Methanesulfonate Salt	IMA	152459-95-5	600	1	Unknwon
Imipramine	IMI	50-49-7	10	0.125	Unknwon
Imipramine	IMI	50-49-7	10	0.25	Unknwon
Imipramine	IMI	50-49-7	10	0.375	Unknwon
Imipramine	IMI	50-49-7	10	1	Unknwon
Imipramine	IMI	50-49-7	10	4	Unknwon
Imipramine	IMI	50-49-7	10	8	Unknwon
Imipramine	IMI	50-49-7	10	15	Unknwon
Imipramine	IMI	50-49-7	10	29	Unknwon
Imipramine	IMI	50-49-7	30	0.125	Unknwon
Imipramine	IMI	50-49-7	30	0.25	Unknwon
Imipramine	IMI	50-49-7	30	0.375	Unknwon
Imipramine	IMI	50-49-7	30	1	Unknwon
Imipramine	IMI	50-49-7	30	4	Unknwon
Imipramine	IMI	50-49-7	30	8	Unknwon
Imipramine	IMI	50-49-7	30	15	Unknwon
Imipramine	IMI	50-49-7	30	29	Unknwon
Imipramine	IMI	50-49-7	100	0.125	Unknwon
Imipramine	IMI	50-49-7	100	0.25	Unknwon
Imipramine	IMI	50-49-7	100	0.375	Unknwon
Imipramine	IMI	50-49-7	100	1	Unknwon
Imipramine	IMI	50-49-7	100	4	Unknwon
Imipramine	IMI	50-49-7	100	8	Unknwon
Imipramine	IMI	50-49-7	100	15	Unknwon
Imipramine	IMI	50-49-7	100	29	Unknwon
Indomethacin	IM	53-86-1	0.5	4	Non-hepatocarcinogen
Indomethacin	IM	53-86-1	0.5	8	Non-hepatocarcinogen
Indomethacin	IM	53-86-1	0.5	15	Non-hepatocarcinogen
Indomethacin	IM	53-86-1	0.5	29	Non-hepatocarcinogen
Indomethacin	IM	53-86-1	1.6	4	Non-hepatocarcinogen
Indomethacin	IM	53-86-1	1.6	29	Non-hepatocarcinogen
Indomethacin	IM	53-86-1	5	0.25	Non-hepatocarcinogen
Indomethacin	IM	53-86-1	5	0.375	Non-hepatocarcinogen
Indomethacin	IM	53-86-1	5	1	Non-hepatocarcinogen
Indomethacin	IM	53-86-1	5	4	Non-hepatocarcinogen
Indomethacin	IM	53-86-1	5	8	Non-hepatocarcinogen
Indomethacin	IM	53-86-1	5	15	Non-hepatocarcinogen
Indomethacin	IM	53-86-1	12	0.25	Non-hepatocarcinogen
Indomethacin	IM	53-86-1	12	3	Non-hepatocarcinogen
Indomethacin	IM	53-86-1	12	5	Non-hepatocarcinogen
Indomethacin	IM	53-86-1	15	0.125	Non-hepatocarcinogen
Indomethacin	IM	53-86-1	15	0.25	Non-hepatocarcinogen
Indomethacin	IM	53-86-1	15	0.375	Non-hepatocarcinogen
Indomethacin	IM	53-86-1	15	1	Non-hepatocarcinogen
Indomethacin	IM	53-86-1	50	0.125	Non-hepatocarcinogen
Indomethacin	IM	53-86-1	50	0.25	Non-hepatocarcinogen
Indomethacin	IM	53-86-1	50	0.375	Non-hepatocarcinogen
Indomethacin	IM	53-86-1	50	1	Non-hepatocarcinogen
Iproniazid	IPA	54-92-2	6	0.125	Non-hepatocarcinogen
Iproniazid	IPA	54-92-2	6	0.25	Non-hepatocarcinogen
Iproniazid	IPA	54-92-2	6	0.375	Non-hepatocarcinogen
Iproniazid	IPA	54-92-2	6	1	Non-hepatocarcinogen
Iproniazid	IPA	54-92-2	6	4	Non-hepatocarcinogen
Iproniazid	IPA	54-92-2	6	8	Non-hepatocarcinogen
Iproniazid	IPA	54-92-2	6	15	Non-hepatocarcinogen
Iproniazid	IPA	54-92-2	6	29	Non-hepatocarcinogen
Iproniazid	IPA	54-92-2	20	0.125	Non-hepatocarcinogen
Iproniazid	IPA	54-92-2	20	0.25	Non-hepatocarcinogen
Iproniazid	IPA	54-92-2	20	0.375	Non-hepatocarcinogen
Iproniazid	IPA	54-92-2	20	1	Non-hepatocarcinogen
Iproniazid	IPA	54-92-2	20	4	Non-hepatocarcinogen
Iproniazid	IPA	54-92-2	20	8	Non-hepatocarcinogen
Iproniazid	IPA	54-92-2	20	15	Non-hepatocarcinogen
Iproniazid	IPA	54-92-2	20	29	Non-hepatocarcinogen
Iproniazid	IPA	54-92-2	60	0.125	Non-hepatocarcinogen
Iproniazid	IPA	54-92-2	60	0.25	Non-hepatocarcinogen
Iproniazid	IPA	54-92-2	60	0.375	Non-hepatocarcinogen
Iproniazid	IPA	54-92-2	60	1	Non-hepatocarcinogen
Iproniazid	IPA	54-92-2	60	4	Non-hepatocarcinogen
Iproniazid	IPA	54-92-2	60	8	Non-hepatocarcinogen
Iproniazid	IPA	54-92-2	60	15	Non-hepatocarcinogen
Iproniazid	IPA	54-92-2	60	29	Non-hepatocarcinogen
Isoniazid	INAH	54-85-3	50	4	Genotoxic carcinogen
Isoniazid	INAH	54-85-3	50	8	Genotoxic carcinogen
Isoniazid	INAH	54-85-3	50	15	Genotoxic carcinogen
Isoniazid	INAH	54-85-3	50	29	Genotoxic carcinogen
Isoniazid	INAH	54-85-3	100	4	Genotoxic carcinogen
Isoniazid	INAH	54-85-3	100	8	Genotoxic carcinogen
Isoniazid	INAH	54-85-3	100	15	Genotoxic carcinogen
Isoniazid	INAH	54-85-3	100	29	Genotoxic carcinogen
Isoniazid	INAH	54-85-3	200	0.125	Genotoxic carcinogen
Isoniazid	INAH	54-85-3	200	0.25	Genotoxic carcinogen
Isoniazid	INAH	54-85-3	200	0.375	Genotoxic carcinogen
Isoniazid	INAH	54-85-3	200	1	Genotoxic carcinogen
Isoniazid	INAH	54-85-3	200	4	Genotoxic carcinogen
Isoniazid	INAH	54-85-3	200	8	Genotoxic carcinogen
Isoniazid	INAH	54-85-3	200	15	Genotoxic carcinogen
Isoniazid	INAH	54-85-3	200	29	Genotoxic carcinogen
Isoniazid	INAH	54-85-3	600	0.125	Genotoxic carcinogen
Isoniazid	INAH	54-85-3	600	0.25	Genotoxic carcinogen
Isoniazid	INAH	54-85-3	600	0.375	Genotoxic carcinogen
Isoniazid	INAH	54-85-3	600	1	Genotoxic carcinogen
Isoniazid	INAH	54-85-3	2000	0.125	Genotoxic carcinogen
Isoniazid	INAH	54-85-3	2000	0.25	Genotoxic carcinogen
Isoniazid	INAH	54-85-3	2000	0.375	Genotoxic carcinogen
Isoniazid	INAH	54-85-3	2000	1	Genotoxic carcinogen
Ketoconazole	KC	65277-42-1	10	1	Non-hepatocarcinogen
Ketoconazole	KC	65277-42-1	10	4	Non-hepatocarcinogen
Ketoconazole	KC	65277-42-1	10	8	Non-hepatocarcinogen
Ketoconazole	KC	65277-42-1	10	15	Non-hepatocarcinogen
Ketoconazole	KC	65277-42-1	10	29	Non-hepatocarcinogen
Ketoconazole	KC	65277-42-1	30	0.125	Non-hepatocarcinogen
Ketoconazole	KC	65277-42-1	30	0.25	Non-hepatocarcinogen
Ketoconazole	KC	65277-42-1	30	1	Non-hepatocarcinogen
Ketoconazole	KC	65277-42-1	30	4	Non-hepatocarcinogen
Ketoconazole	KC	65277-42-1	30	15	Non-hepatocarcinogen
Ketoconazole	KC	65277-42-1	30	29	Non-hepatocarcinogen
Ketoconazole	KC	65277-42-1	100	0.125	Non-hepatocarcinogen
Ketoconazole	KC	65277-42-1	100	0.25	Non-hepatocarcinogen
Ketoconazole	KC	65277-42-1	100	0.375	Non-hepatocarcinogen
Ketoconazole	KC	65277-42-1	100	1	Non-hepatocarcinogen
Ketoconazole	KC	65277-42-1	100	4	Non-hepatocarcinogen
Ketoconazole	KC	65277-42-1	100	8	Non-hepatocarcinogen
Ketoconazole	KC	65277-42-1	100	15	Non-hepatocarcinogen
Ketoconazole	KC	65277-42-1	100	29	Non-hepatocarcinogen
Ketoconazole	KC	65277-42-1	114	0.25	Non-hepatocarcinogen
Ketoconazole	KC	65277-42-1	114	5	Non-hepatocarcinogen
Ketoconazole	KC	65277-42-1	227	0.25	Non-hepatocarcinogen
Ketoconazole	KC	65277-42-1	227	1	Non-hepatocarcinogen
Ketoconazole	KC	65277-42-1	227	3	Non-hepatocarcinogen
Labetalol	LBT	36894-69-6	45	0.125	Unknwon
Labetalol	LBT	36894-69-6	45	0.25	Unknwon
Labetalol	LBT	36894-69-6	45	0.375	Unknwon
Labetalol	LBT	36894-69-6	45	1	Unknwon
Labetalol	LBT	36894-69-6	45	4	Unknwon
Labetalol	LBT	36894-69-6	45	8	Unknwon
Labetalol	LBT	36894-69-6	45	15	Unknwon
Labetalol	LBT	36894-69-6	45	29	Unknwon
Labetalol	LBT	36894-69-6	150	0.125	Unknwon
Labetalol	LBT	36894-69-6	150	0.25	Unknwon
Labetalol	LBT	36894-69-6	150	0.375	Unknwon
[truncated: 1,530 more rows]
