# Supplementary material for: ToxDBScan: Large-Scale Similarity Screening of Toxicological Databases for Drug Candidates
Source: Int J Mol Sci. 2014 Oct 21;15(10):19037–55. doi: 10.3390/ijms151019037 (PMC4227259; doi:10.3390/ijms151019037)
Supplement: Supplementary File 1 [file ijms-15-19037-s001.zip › Table S3 Drugmatrix Compounds.xls]

## Sheet: Sheet1
Table S3. Chemicals included in DrugMatrix. Conditions for all experiments in DrugMatrix are contained, including dosage, duration of dosing, CAS number and hepatocarcinogenicity information.
Compound	Short Name	CAS	Dosage [ppm]	Duration [days]	Hepatocarcinogenicity
1,1-Dichloroethene	DCE	75-35-4	600	1	Non-hepatocarcinogen
1,1-Dichloroethene	DCE	75-35-4	600	3	Non-hepatocarcinogen
1,1-Dichloroethene	DCE	75-35-4	600	5	Non-hepatocarcinogen
2,3,7,8-Tetrachlorodibenzo-P-Dioxin	TCDD	1746-01-6	0.02	1	Nongenotoxic carcinogen
2,3,7,8-Tetrachlorodibenzo-P-Dioxin	TCDD	1746-01-6	0.02	3	Nongenotoxic carcinogen
2,3,7,8-Tetrachlorodibenzo-P-Dioxin	TCDD	1746-01-6	0.02	5	Nongenotoxic carcinogen
3-Methylcholanthrene	MC	56-49-5	300	1	Non-hepatocarcinogen
3-Methylcholanthrene	MC	56-49-5	300	3	Non-hepatocarcinogen
3-Methylcholanthrene	MC	56-49-5	300	5	Non-hepatocarcinogen
3,3',4',5-Tetrachlorosalicylanilide	TCSA	1154-59-2	5	0.25	Unknwon
3,3',4',5-Tetrachlorosalicylanilide	TCSA	1154-59-2	5	1	Unknwon
6-Mercaptopurine	MPU	74-61-3	25	3	Non-hepatocarcinogen
6-Mercaptopurine	MPU	74-61-3	25	5	Non-hepatocarcinogen
Acetamidofluorene	AAF	53-96-3	30	3	Genotoxic carcinogen
Acetaminophen	APAP	103-90-2	100	5	Nongenotoxic carcinogen
Acetazolamide	ACZ	59-66-5	250	0.25	Non-hepatocarcinogen
Aflatoxin B1	AFB1	1162-65-8	0.3	3	Genotoxic carcinogen
Aflatoxin B1	AFB1	1162-65-8	0.3	5	Genotoxic carcinogen
Albendazole	ALB	54965-21-8	62	0.25	Non-hepatocarcinogen
Albendazole	ALB	54965-21-8	62	1	Non-hepatocarcinogen
Albendazole	ALB	54965-21-8	62	3	Non-hepatocarcinogen
Allyl Alcohol	AA	107-18-6	16	0.25	Non-hepatocarcinogen
Allyl Alcohol	AA	107-18-6	16	1	Non-hepatocarcinogen
Allyl Alcohol	AA	107-18-6	16	3	Non-hepatocarcinogen
Allyl Alcohol	AA	107-18-6	16	5	Non-hepatocarcinogen
Allyl Alcohol	AA	107-18-6	16	7	Non-hepatocarcinogen
Allyl Alcohol	AA	107-18-6	25	1	Non-hepatocarcinogen
Allyl Alcohol	AA	107-18-6	25	3	Non-hepatocarcinogen
Allyl Alcohol	AA	107-18-6	25	7	Non-hepatocarcinogen
Allyl Alcohol	AA	107-18-6	32	1	Non-hepatocarcinogen
Allyl Alcohol	AA	107-18-6	32	3	Non-hepatocarcinogen
Allyl Alcohol	AA	107-18-6	32	5	Non-hepatocarcinogen
Alpha-Naphthoflavone	aNF	604-59-1	80	5	Unknwon
Altretamine	ALT	645-05-6	13	0.25	Unknwon
Altretamine	ALT	645-05-6	13	1	Unknwon
Altretamine	ALT	645-05-6	13	3	Unknwon
Altretamine	ALT	645-05-6	13	5	Unknwon
Altretamine	ALT	645-05-6	40	0.25	Unknwon
Altretamine	ALT	645-05-6	40	1	Unknwon
Altretamine	ALT	645-05-6	40	3	Unknwon
Amantadine	ATD	768-94-5	220	1	Unknwon
Aminoglutethimide	AGE	125-84-8	350	3	Non-hepatocarcinogen
Aminosalicylic Acid	AMA	65-49-6	2337	1	Unknwon
Aminosalicylic Acid	AMA	65-49-6	2337	5	Unknwon
Amiodarone	AM	1951-25-3	147	3	Non-hepatocarcinogen
Amiodarone	AM	1951-25-3	147	5	Non-hepatocarcinogen
Amlodipine	ALP	88150-42-9	0.2	0.25	Non-hepatocarcinogen
Amlodipine	ALP	88150-42-9	0.2	1	Non-hepatocarcinogen
Amlodipine	ALP	88150-42-9	19	3	Non-hepatocarcinogen
Anastrozole	ANZ	120511-73-1	400	1	Unknwon
Anastrozole	ANZ	120511-73-1	400	3	Unknwon
Anastrozole	ANZ	120511-73-1	400	5	Unknwon
Artemisinin	ART	63968-64-9	2000	1	Unknwon
Artemisinin	ART	63968-64-9	2000	3	Unknwon
Artemisinin	ART	63968-64-9	2000	5	Unknwon
Aspirin	ASA	50-78-2	35	0.25	Non-hepatocarcinogen
Aspirin	ASA	50-78-2	35	1	Non-hepatocarcinogen
Aspirin	ASA	50-78-2	35	5	Non-hepatocarcinogen
Aspirin	ASA	50-78-2	167	1	Non-hepatocarcinogen
Aspirin	ASA	50-78-2	167	3	Non-hepatocarcinogen
Aspirin	ASA	50-78-2	375	0.25	Non-hepatocarcinogen
Aspirin	ASA	50-78-2	375	3	Non-hepatocarcinogen
Aspirin	ASA	50-78-2	375	5	Non-hepatocarcinogen
Atorvastatin	ATV	134523-03-8	2.5	0.25	Non-hepatocarcinogen
Atorvastatin	ATV	134523-03-8	2.5	1	Non-hepatocarcinogen
Atorvastatin	ATV	134523-03-8	2.5	3	Non-hepatocarcinogen
Atorvastatin	ATV	134523-03-8	2.5	5	Non-hepatocarcinogen
Atorvastatin	ATV	134523-03-8	300	0.25	Non-hepatocarcinogen
Azathioprine	AZP	446-86-6	20	3	Non-hepatocarcinogen
Azathioprine	AZP	446-86-6	54	3	Non-hepatocarcinogen
Azathioprine	AZP	446-86-6	54	5	Non-hepatocarcinogen
Azathioprine	AZP	446-86-6	160	3	Non-hepatocarcinogen
Balsalazide	BAL	213594-60-6	1100	0.25	Non-hepatocarcinogen
Balsalazide	BAL	213594-60-6	1100	1	Non-hepatocarcinogen
Balsalazide	BAL	213594-60-6	1100	3	Non-hepatocarcinogen
Balsalazide	BAL	213594-60-6	1100	5	Non-hepatocarcinogen
Benzethonium Chloride	BEC	121-54-0	30	3	Non-hepatocarcinogen
Benzothiazyl Disulfide	BTD	120-78-5	2600	1	Unknwon
Benzothiazyl Disulfide	BTD	120-78-5	2600	3	Unknwon
Benzothiazyl Disulfide	BTD	120-78-5	2600	5	Unknwon
Beta-Estradiol	bED	50-28-2	0.3	0.25	Unknwon
Beta-Estradiol	bED	50-28-2	0.3	1	Unknwon
Beta-Estradiol	bED	50-28-2	0.3	3	Unknwon
Beta-Estradiol	bED	50-28-2	0.3	5	Unknwon
Beta-Estradiol	bED	50-28-2	150	0.25	Unknwon
Beta-Estradiol	bED	50-28-2	150	1	Unknwon
Beta-Estradiol	bED	50-28-2	150	3	Unknwon
Beta-Estradiol	bED	50-28-2	150	5	Unknwon
Beta-Estradiol 3-Benzoate	bE3B	50-50-0	0.25	0.25	Unknwon
Beta-Estradiol 3-Benzoate	bE3B	50-50-0	0.25	1	Unknwon
Beta-Estradiol 3-Benzoate	bE3B	50-50-0	2	1	Unknwon
Beta-Estradiol 3-Benzoate	bE3B	50-50-0	2	3	Unknwon
Beta-Naphthoflavone	bNF	6051-87-2	1500	1	Unknwon
Beta-Naphthoflavone	bNF	6051-87-2	1500	3	Unknwon
Beta-Naphthoflavone	bNF	6051-87-2	1500	5	Unknwon
Betamethasone	bMS	378-44-9	79	1	Unknwon
Betamethasone	bMS	378-44-9	79	3	Unknwon
Betamethasone	bMS	378-44-9	79	5	Unknwon
Bezafibrate	BEZ	41859-67-0	100	0.25	Unknwon
Bezafibrate	BEZ	41859-67-0	100	1	Unknwon
Bezafibrate	BEZ	41859-67-0	100	3	Unknwon
Bezafibrate	BEZ	41859-67-0	100	7	Unknwon
Bezafibrate	BEZ	41859-67-0	617	0.25	Unknwon
Bezafibrate	BEZ	41859-67-0	617	1	Unknwon
Bezafibrate	BEZ	41859-67-0	617	3	Unknwon
Bezafibrate	BEZ	41859-67-0	617	7	Unknwon
Bis(2-Ethylhexyl)Phthalate	B2EP	15495-94-0	1000	3	Nongenotoxic carcinogen
Bis(2-Ethylhexyl)Phthalate	B2EP	15495-94-0	1000	5	Nongenotoxic carcinogen
Bisphenol A	BISa	27100-33-0	100	1	Non-hepatocarcinogen
Bisphenol A	BISa	27100-33-0	610	0.25	Non-hepatocarcinogen
Bisphenol A	BISa	27100-33-0	610	1	Non-hepatocarcinogen
Bithionol	BTN	97-18-7	59	0.25	Unknwon
Bithionol	BTN	97-18-7	59	1	Unknwon
Bithionol	BTN	97-18-7	59	3	Unknwon
Bithionol	BTN	97-18-7	59	5	Unknwon
Bithionol	BTN	97-18-7	333	0.25	Unknwon
Bithionol	BTN	97-18-7	333	1	Unknwon
Bithionol	BTN	97-18-7	333	5	Unknwon
Carbamazepine	CBZ	298-46-4	490	1	Nongenotoxic carcinogen
Carbamazepine	CBZ	298-46-4	490	3	Nongenotoxic carcinogen
Carbamazepine	CBZ	298-46-4	490	5	Nongenotoxic carcinogen
Carbimazole	CARB	22232-54-8	400	1	Unknwon
Carbimazole	CARB	22232-54-8	400	3	Unknwon
Carbimazole	CARB	22232-54-8	400	5	Unknwon
Carbon Tetrachloride	CCL4	56-23-5	400	0.25	Nongenotoxic carcinogen
Carbon Tetrachloride	CCL4	56-23-5	400	1	Nongenotoxic carcinogen
Carbon Tetrachloride	CCL4	56-23-5	400	3	Nongenotoxic carcinogen
Carbon Tetrachloride	CCL4	56-23-5	400	7	Nongenotoxic carcinogen
Carbon Tetrachloride	CCL4	56-23-5	1175	0.25	Nongenotoxic carcinogen
Carbon Tetrachloride	CCL4	56-23-5	1175	1	Nongenotoxic carcinogen
Carbon Tetrachloride	CCL4	56-23-5	1175	3	Nongenotoxic carcinogen
Carbon Tetrachloride	CCL4	56-23-5	1175	7	Nongenotoxic carcinogen
Carmustine	CMT	154-93-8	4	0.25	Unknwon
Carmustine	CMT	154-93-8	4	1	Unknwon
Carmustine	CMT	154-93-8	4	3	Unknwon
Carmustine	CMT	154-93-8	4	5	Unknwon
Carmustine	CMT	154-93-8	16	0.25	Unknwon
Carmustine	CMT	154-93-8	16	1	Unknwon
Carmustine	CMT	154-93-8	16	3	Unknwon
Carmustine	CMT	154-93-8	16	5	Unknwon
Carvedilol	CVD	72956-09-3	2000	1	Non-hepatocarcinogen
Carvedilol	CVD	72956-09-3	2000	3	Non-hepatocarcinogen
Carvedilol	CVD	72956-09-3	2000	5	Non-hepatocarcinogen
Catechol	CAC	12385-08-9	40	0.25	Non-hepatocarcinogen
Catechol	CAC	12385-08-9	40	1	Non-hepatocarcinogen
Catechol	CAC	12385-08-9	195	0.25	Non-hepatocarcinogen
Catechol	CAC	12385-08-9	195	1	Non-hepatocarcinogen
Catechol	CAC	12385-08-9	195	3	Non-hepatocarcinogen
Catechol	CAC	12385-08-9	195	5	Non-hepatocarcinogen
Cerivastatin	CER	143201-11-0	0.05	0.25	Nongenotoxic carcinogen
Cerivastatin	CER	143201-11-0	0.05	1	Nongenotoxic carcinogen
Cerivastatin	CER	143201-11-0	7	1	Nongenotoxic carcinogen
Cerivastatin	CER	143201-11-0	7	3	Nongenotoxic carcinogen
Cerivastatin	CER	143201-11-0	7	5	Nongenotoxic carcinogen
Chlorambucil	CHA	305-03-3	0.6	0.25	Non-hepatocarcinogen
Chlorambucil	CHA	305-03-3	0.6	5	Non-hepatocarcinogen
Chlorambucil	CHA	305-03-3	4.5	3	Non-hepatocarcinogen
Chlorambucil	CHA	305-03-3	4.5	5	Non-hepatocarcinogen
Chloroxylenol	CXN	88-04-0	1915	3	Unknwon
Chlorpheniramine	CHL	67-66-3	60	0.25	Nongenotoxic carcinogen
Chlorpheniramine	CHL	67-66-3	600	1	Nongenotoxic carcinogen
Chlorpheniramine	CHL	67-66-3	600	3	Nongenotoxic carcinogen
Chlorpheniramine	CHL	67-66-3	600	5	Nongenotoxic carcinogen
Cholecalciferol	CHO	67-97-0	8	3	Unknwon
Cinnarizine	CIN	298-57-7	750	3	Unknwon
Citalopram	CIT	59729-33-8	90	0.25	Non-hepatocarcinogen
Clofibrate	CFB	637-07-0	130	3	Nongenotoxic carcinogen
Clofibrate	CFB	637-07-0	130	7	Nongenotoxic carcinogen
Clofibrate	CFB	637-07-0	500	7	Nongenotoxic carcinogen
Clofibric Acid	CLO	882-09-7	448	1	Nongenotoxic carcinogen
Clofibric Acid	CLO	882-09-7	448	3	Nongenotoxic carcinogen
Clofibric Acid	CLO	882-09-7	448	5	Nongenotoxic carcinogen
Clomiphene	CLP	911-45-5	250	3	Unknwon
Clomiphene	CLP	911-45-5	250	5	Unknwon
Clomipramine	CPM	303-49-1	115	3	Non-hepatocarcinogen
Clonazepam	CLZ	1622-61-3	2500	0.25	Unknwon
Clonazepam	CLZ	1622-61-3	2500	1	Unknwon
Clonazepam	CLZ	1622-61-3	2500	3	Unknwon
Clonazepam	CLZ	1622-61-3	2500	5	Unknwon
Closantel	CST	57808-65-8	22	1	Non-hepatocarcinogen
Closantel	CST	57808-65-8	22	3	Non-hepatocarcinogen
Closantel	CST	57808-65-8	22	5	Non-hepatocarcinogen
Clotrimazole	CTM	23593-75-1	52	0.25	Non-hepatocarcinogen
Clotrimazole	CTM	23593-75-1	52	1	Non-hepatocarcinogen
Clotrimazole	CTM	23593-75-1	52	3	Non-hepatocarcinogen
Clotrimazole	CTM	23593-75-1	52	5	Non-hepatocarcinogen
Clotrimazole	CTM	23593-75-1	89	0.25	Non-hepatocarcinogen
Clotrimazole	CTM	23593-75-1	89	1	Non-hepatocarcinogen
Clotrimazole	CTM	23593-75-1	89	3	Non-hepatocarcinogen
Clotrimazole	CTM	23593-75-1	89	5	Non-hepatocarcinogen
Clotrimazole	CTM	23593-75-1	178	0.25	Non-hepatocarcinogen
Clotrimazole	CTM	23593-75-1	178	3	Non-hepatocarcinogen
Clotrimazole	CTM	23593-75-1	178	5	Non-hepatocarcinogen
Cortisone	COR	53-06-5	206	1	Unknwon
Cortisone	COR	53-06-5	206	3	Unknwon
Cortisone	COR	53-06-5	206	5	Unknwon
Crotamiton	CRO	483-63-6	750	1	Unknwon
Crotamiton	CRO	483-63-6	750	3	Unknwon
Crotamiton	CRO	483-63-6	750	5	Unknwon
Cyclophosphamide	CPA	427-51-0	2500	0.25	Nongenotoxic carcinogen
Cyclophosphamide	CPA	427-51-0	2500	1	Nongenotoxic carcinogen
Cyclophosphamide	CPA	427-51-0	2500	3	Nongenotoxic carcinogen
Cyclophosphamide	CPA	427-51-0	2500	5	Nongenotoxic carcinogen
Cyclopropane Carboxylic Acid	CCA	1759-53-1	375	1	Unknwon
Cyclopropane Carboxylic Acid	CCA	1759-53-1	375	3	Unknwon
Cyclosporine A	CSA	59865-13-3	350	5	Non-hepatocarcinogen
Cytarabine	CTB	147-94-4	487	3	Unknwon
Danazol	DNZ	17230-88-5	2000	3	Non-hepatocarcinogen
Daunorubicin	DAU	20830-81-3	3.25	1	Non-hepatocarcinogen
Daunorubicin	DAU	20830-81-3	3.25	3	Non-hepatocarcinogen
Dexamethasone	DEX	50-02-2	1	0.25	Non-hepatocarcinogen
Dexamethasone	DEX	50-02-2	1	1	Non-hepatocarcinogen
Dexamethasone	DEX	50-02-2	1	3	Non-hepatocarcinogen
Dexamethasone	DEX	50-02-2	1	5	Non-hepatocarcinogen
Dexamethasone	DEX	50-02-2	150	0.25	Non-hepatocarcinogen
Dexamethasone	DEX	50-02-2	150	1	Non-hepatocarcinogen
Dexamethasone	DEX	50-02-2	150	3	Non-hepatocarcinogen
Diazepam	DZP	439-14-5	710	1	Non-hepatocarcinogen
Diazepam	DZP	439-14-5	710	3	Non-hepatocarcinogen
Diazepam	DZP	439-14-5	710	5	Non-hepatocarcinogen
Diclofenac	DFNa	15307-86-5	10	0.25	Non-hepatocarcinogen
Diclofenac	DFNa	15307-86-5	10	1	Non-hepatocarcinogen
Diclofenac	DFNa	15307-86-5	10	3	Non-hepatocarcinogen
Diethylstilbestrol	DES	6898-97-1	2.8	0.25	Nongenotoxic carcinogen
Diethylstilbestrol	DES	6898-97-1	2.8	1	Nongenotoxic carcinogen
Diethylstilbestrol	DES	6898-97-1	2.8	3	Nongenotoxic carcinogen
Diethylstilbestrol	DES	6898-97-1	2.8	5	Nongenotoxic carcinogen
Diethylstilbestrol	DES	6898-97-1	280	0.25	Nongenotoxic carcinogen
Diethylstilbestrol	DES	6898-97-1	280	3	Nongenotoxic carcinogen
Diethylstilbestrol	DES	6898-97-1	280	5	Nongenotoxic carcinogen
Digoxin	DIG	20830-75-5	11	1	Unknwon
Doxorubicin	DOX	23214-92-8	0.65	0.25	Non-hepatocarcinogen
Doxorubicin	DOX	23214-92-8	0.65	1	Non-hepatocarcinogen
Doxorubicin	DOX	23214-92-8	0.65	3	Non-hepatocarcinogen
Doxorubicin	DOX	23214-92-8	3	0.25	Non-hepatocarcinogen
Doxorubicin	DOX	23214-92-8	3	1	Non-hepatocarcinogen
Doxorubicin	DOX	23214-92-8	3	3	Non-hepatocarcinogen
Doxorubicin	DOX	23214-92-8	3	5	Non-hepatocarcinogen
Econazole	ECO	27220-47-9	43	0.25	Unknwon
Econazole	ECO	27220-47-9	43	1	Unknwon
Econazole	ECO	27220-47-9	43	3	Unknwon
Econazole	ECO	27220-47-9	43	5	Unknwon
Econazole	ECO	27220-47-9	334	0.25	Unknwon
Econazole	ECO	27220-47-9	334	1	Unknwon
Econazole	ECO	27220-47-9	334	5	Unknwon
Enoxacin	ENO	74011-58-8	100	0.25	Unknwon
Enoxacin	ENO	74011-58-8	100	1	Unknwon
Enoxacin	ENO	74011-58-8	100	3	Unknwon
Enoxacin	ENO	74011-58-8	750	0.25	Unknwon
Enoxacin	ENO	74011-58-8	750	1	Unknwon
Epirubicin	EPI	56420-45-2	2.7	1	Non-hepatocarcinogen
Epirubicin	EPI	56420-45-2	2.7	3	Non-hepatocarcinogen
Epirubicin	EPI	56420-45-2	2.7	5	Non-hepatocarcinogen
Erlotinib	ERL	183319-69-9	58	1	Unknwon
Erlotinib	ERL	183319-69-9	58	3	Unknwon
Erlotinib	ERL	183319-69-9	58	5	Unknwon
Erlotinib	ERL	183319-69-9	116	1	Unknwon
Erlotinib	ERL	183319-69-9	116	3	Unknwon
Erlotinib	ERL	183319-69-9	116	5	Unknwon
Erythromycin	EMC	82343-12-2	1500	1	Non-hepatocarcinogen
Erythromycin	EMC	82343-12-2	1500	3	Non-hepatocarcinogen
Erythromycin	EMC	82343-12-2	1500	5	Non-hepatocarcinogen
Estriol	EST	50-27-1	313	1	Unknwon
Estriol	EST	50-27-1	313	3	Unknwon
Estriol	EST	50-27-1	313	5	Unknwon
Ethanol	ETN	64-17-5	6000	0.25	Nongenotoxic carcinogen
Ethinylestradiol	EE	57-63-6	10	0.25	Nongenotoxic carcinogen
Ethinylestradiol	EE	57-63-6	10	1	Nongenotoxic carcinogen
Ethinylestradiol	EE	57-63-6	10	3	Nongenotoxic carcinogen
Ethinylestradiol	EE	57-63-6	10	5	Nongenotoxic carcinogen
Ethinylestradiol	EE	57-63-6	1480	0.25	Nongenotoxic carcinogen
Ethinylestradiol	EE	57-63-6	1480	1	Nongenotoxic carcinogen
Ethinylestradiol	EE	57-63-6	1480	3	Nongenotoxic carcinogen
Ethinylestradiol	EE	57-63-6	1480	5	Nongenotoxic carcinogen
Ethisterone	ETT	434-03-7	1500	1	Unknwon
Ethisterone	ETT	434-03-7	1500	3	Unknwon
Ethisterone	ETT	434-03-7	1500	5	Unknwon
Ethylestrenol	EES	965-90-2	390	5	Unknwon
Etodolac	ETD	41340-25-4	24	1	Non-hepatocarcinogen
Etodolac	ETD	41340-25-4	24	3	Non-hepatocarcinogen
Etodolac	ETD	41340-25-4	24	5	Non-hepatocarcinogen
Fenbendazole	FBZ	43210-67-9	375	1	Nongenotoxic carcinogen
Fenofibrate	FFB	49562-28-9	43	0.25	Nongenotoxic carcinogen
Fenofibrate	FFB	49562-28-9	43	1	Nongenotoxic carcinogen
Fenofibrate	FFB	49562-28-9	43	5	Nongenotoxic carcinogen
Fenofibrate	FFB	49562-28-9	100	0.25	Nongenotoxic carcinogen
Fenofibrate	FFB	49562-28-9	100	1	Nongenotoxic carcinogen
Fenofibrate	FFB	49562-28-9	100	3	Nongenotoxic carcinogen
Fenofibrate	FFB	49562-28-9	100	7	Nongenotoxic carcinogen
Fenofibrate	FFB	49562-28-9	215	0.25	Nongenotoxic carcinogen
Fenofibrate	FFB	49562-28-9	215	1	Nongenotoxic carcinogen
Fenofibrate	FFB	49562-28-9	215	3	Nongenotoxic carcinogen
Fenofibrate	FFB	49562-28-9	215	5	Nongenotoxic carcinogen
Fenofibrate	FFB	49562-28-9	430	5	Nongenotoxic carcinogen
Finasteride	FIN	98319-26-7	800	3	Non-hepatocarcinogen
Finasteride	FIN	98319-26-7	800	5	Non-hepatocarcinogen
Flubendazole	FLB	31430-15-6	1200	1	Non-hepatocarcinogen
Fluconazole	FLU	86386-73-4	10	0.25	Nongenotoxic carcinogen
Fluconazole	FLU	86386-73-4	394	0.25	Nongenotoxic carcinogen
Fluconazole	FLU	86386-73-4	394	1	Nongenotoxic carcinogen
Fluconazole	FLU	86386-73-4	394	3	Nongenotoxic carcinogen
Fluconazole	FLU	86386-73-4	394	5	Nongenotoxic carcinogen
Fludrocortisone Acetate	FCA	514-36-3	125	1	Unknwon
Fluocinolone Acetonide	FLA	67-73-2	2.5	1	Unknwon
Fluocinolone Acetonide	FLA	67-73-2	2.5	3	Unknwon
Fluocinolone Acetonide	FLA	67-73-2	2.5	5	Unknwon
Fluphenazine	FP	69-23-8	2.5	0.25	Non-hepatocarcinogen
Fluphenazine	FP	69-23-8	2.5	1	Non-hepatocarcinogen
Fluphenazine	FP	69-23-8	2.5	3	Non-hepatocarcinogen
Fluphenazine	FP	69-23-8	22	0.25	Non-hepatocarcinogen
Fluphenazine	FP	69-23-8	22	1	Non-hepatocarcinogen
Fluvastatin	FST	93957-54-1	5	0.25	Non-hepatocarcinogen
Fluvastatin	FST	93957-54-1	5	1	Non-hepatocarcinogen
Fluvastatin	FST	93957-54-1	5	5	Non-hepatocarcinogen
Fluvastatin	FST	93957-54-1	94	0.25	Non-hepatocarcinogen
Fluvastatin	FST	93957-54-1	94	1	Non-hepatocarcinogen
Fluvastatin	FST	93957-54-1	94	3	Non-hepatocarcinogen
Fluvastatin	FST	93957-54-1	94	5	Non-hepatocarcinogen
Gefitinib	GEF	184475-35-2	58	1	Unknwon
Gefitinib	GEF	184475-35-2	58	3	Unknwon
Gefitinib	GEF	184475-35-2	58	5	Unknwon
Gefitinib	GEF	184475-35-2	116	1	Unknwon
Gefitinib	GEF	184475-35-2	116	3	Unknwon
Gefitinib	GEF	184475-35-2	116	5	Unknwon
Gemfibrozil	GFZ	25812-30-0	100	0.25	Nongenotoxic carcinogen
Gemfibrozil	GFZ	25812-30-0	100	1	Nongenotoxic carcinogen
Gemfibrozil	GFZ	25812-30-0	100	3	Nongenotoxic carcinogen
Gemfibrozil	GFZ	25812-30-0	100	7	Nongenotoxic carcinogen
Gemfibrozil	GFZ	25812-30-0	700	0.25	Nongenotoxic carcinogen
Gemfibrozil	GFZ	25812-30-0	700	1	Nongenotoxic carcinogen
Gemfibrozil	GFZ	25812-30-0	700	3	Nongenotoxic carcinogen
Gemfibrozil	GFZ	25812-30-0	700	7	Nongenotoxic carcinogen
Genistein	GEN	446-72-0	20	0.25	Unknwon
Genistein	GEN	446-72-0	20	5	Unknwon
Gentamicin	GMC	1403-66-3	267	3	Non-hepatocarcinogen
Gentamicin	GMC	1403-66-3	267	5	Non-hepatocarcinogen
Gentian Violet	GV	548-62-9	18	1	Unknwon
Gentian Violet	GV	548-62-9	18	3	Unknwon
Glipizide	GLI	29094-61-9	2500	0.25	Non-hepatocarcinogen
Hexachlorophene	HCP	70-30-4	8	1	Non-hepatocarcinogen
Hydrazine	HYD	302-01-2	45	0.25	Genotoxic carcinogen
Hydrazine	HYD	302-01-2	45	3	Genotoxic carcinogen
Hydrazine	HYD	302-01-2	45	5	Genotoxic carcinogen
Hydrocortisone	HCO	50-23-7	56	1	Non-hepatocarcinogen
Hydrocortisone	HCO	50-23-7	56	3	Non-hepatocarcinogen
Hydrocortisone	HCO	50-23-7	56	5	Non-hepatocarcinogen
Ibuprofen	IBU	15687-27-1	263	1	Non-hepatocarcinogen
Ibuprofen	IBU	15687-27-1	263	3	Non-hepatocarcinogen
Ibuprofen	IBU	15687-27-1	263	5	Non-hepatocarcinogen
Idebenone	IDE	58186-27-9	2500	0.25	Unknwon
Ifosfamide	IFO	84711-20-6	17	0.25	Non-hepatocarcinogen
Ifosfamide	IFO	84711-20-6	17	1	Non-hepatocarcinogen
Ifosfamide	IFO	84711-20-6	143	0.25	Non-hepatocarcinogen
Ifosfamide	IFO	84711-20-6	143	1	Non-hepatocarcinogen
Ifosfamide	IFO	84711-20-6	143	3	Non-hepatocarcinogen
Imatinib, Methanesulfonate Salt	IMA	152459-95-5	15	1	Non-hepatocarcinogen
Imatinib, Methanesulfonate Salt	IMA	152459-95-5	15	3	Non-hepatocarcinogen
Imatinib, Methanesulfonate Salt	IMA	152459-95-5	15	5	Non-hepatocarcinogen
Imatinib, Methanesulfonate Salt	IMA	152459-95-5	150	1	Non-hepatocarcinogen
Imatinib, Methanesulfonate Salt	IMA	152459-95-5	150	3	Non-hepatocarcinogen
Imatinib, Methanesulfonate Salt	IMA	152459-95-5	150	5	Non-hepatocarcinogen
Indomethacin	IM	53-86-1	12	0.25	Non-hepatocarcinogen
Indomethacin	IM	53-86-1	12	3	Non-hepatocarcinogen
Indomethacin	IM	53-86-1	12	5	Non-hepatocarcinogen
Interleukin 1 Beta, Rat	IL1b		0.01	1	Unknwon
Interleukin 6, Rat	IL6		0.125	0.25	Unknwon
Interleukin 6, Rat	IL6		0.125	1	Unknwon
Isoeugenol	EUG	97-54-1	1560	1	Non-hepatocarcinogen
Isoeugenol	EUG	97-54-1	1560	3	Non-hepatocarcinogen
Isoeugenol	EUG	97-54-1	1560	5	Non-hepatocarcinogen
Isotretinoin	ITT	4759-48-2	13	0.25	Nongenotoxic carcinogen
Isotretinoin	ITT	4759-48-2	13	1	Nongenotoxic carcinogen
Isotretinoin	ITT	4759-48-2	13	3	Nongenotoxic carcinogen
Isotretinoin	ITT	4759-48-2	125	0.25	Nongenotoxic carcinogen
Itraconazole	ICZ	84604-65-9	30	0.25	Non-hepatocarcinogen
Itraconazole	ICZ	84604-65-9	30	1	Non-hepatocarcinogen
Itraconazole	ICZ	84604-65-9	1093	0.25	Non-hepatocarcinogen
Itraconazole	ICZ	84604-65-9	1093	1	Non-hepatocarcinogen
Itraconazole	ICZ	84604-65-9	1093	5	Non-hepatocarcinogen
Ketoconazole	KC	65277-42-1	114	0.25	Non-hepatocarcinogen
Ketoconazole	KC	65277-42-1	114	5	Non-hepatocarcinogen
Ketoconazole	KC	65277-42-1	227	0.25	Non-hepatocarcinogen
Ketoconazole	KC	65277-42-1	227	1	Non-hepatocarcinogen
Ketoconazole	KC	65277-42-1	227	3	Non-hepatocarcinogen
Ketorolac	KR	74103-06-3	48	1	Non-hepatocarcinogen
Ketorolac	KR	74103-06-3	48	3	Non-hepatocarcinogen
Ketorolac	KR	74103-06-3	48	5	Non-hepatocarcinogen
Lead (Ii) Acetate	L2A	301-04-2	600	3	Non-hepatocarcinogen
Lead (Ii) Acetate	L2A	301-04-2	600	5	Non-hepatocarcinogen
Lead(Iv) Acetate	L4A	546-67-8	600	3	Non-hepatocarcinogen
Lead(Iv) Acetate	L4A	546-67-8	600	5	Non-hepatocarcinogen
Leflunomide	LEF	75706-12-6	30	0.25	Non-hepatocarcinogen
Leflunomide	LEF	75706-12-6	30	1	Non-hepatocarcinogen
Leflunomide	LEF	75706-12-6	60	0.25	Non-hepatocarcinogen
Leflunomide	LEF	75706-12-6	60	1	Non-hepatocarcinogen
Leflunomide	LEF	75706-12-6	60	3	Non-hepatocarcinogen
Leflunomide	LEF	75706-12-6	60	5	Non-hepatocarcinogen
Letrozole	LTZ	112809-51-5	250	0.25	Non-hepatocarcinogen
Letrozole	LTZ	112809-51-5	250	1	Non-hepatocarcinogen
Letrozole	LTZ	112809-51-5	250	3	Non-hepatocarcinogen
Letrozole	LTZ	112809-51-5	250	5	Non-hepatocarcinogen
Lipopolysaccharide E. Coli O55 B5	LPSEC		1.25	0.25	Unknwon
Lipopolysaccharide E. Coli O55 B5	LPSEC		1.25	1	Unknwon
Lipopolysaccharide E. Coli O55 B5	LPSEC		1.25	3	Unknwon
Lipopolysaccharide E. Coli O55 B5	LPSEC		1.25	5	Unknwon
Lomefloxacin	LFC	98079-51-7	2000	3	Unknwon
Lomustine	LS	13010-47-4	4.2	0.25	Genotoxic carcinogen
Lomustine	LS	13010-47-4	4.2	1	Genotoxic carcinogen
Lomustine	LS	13010-47-4	4.2	3	Genotoxic carcinogen
Lomustine	LS	13010-47-4	4.2	5	Genotoxic carcinogen
Lomustine	LS	13010-47-4	8.75	1	Genotoxic carcinogen
Lomustine	LS	13010-47-4	8.75	3	Genotoxic carcinogen
Lomustine	LS	13010-47-4	8.75	5	Genotoxic carcinogen
Lorazepam	LAP	846-49-1	2000	1	Non-hepatocarcinogen
Lorazepam	LAP	846-49-1	2000	3	Non-hepatocarcinogen
Lorazepam	LAP	846-49-1	2000	5	Non-hepatocarcinogen
Lovastatin	LOV	75330-75-5	450	0.25	Nongenotoxic carcinogen
Lovastatin	LOV	75330-75-5	450	1	Nongenotoxic carcinogen
Lovastatin	LOV	75330-75-5	450	5	Nongenotoxic carcinogen
Lovastatin	LOV	75330-75-5	1500	1	Nongenotoxic carcinogen
Lovastatin	LOV	75330-75-5	1500	3	Nongenotoxic carcinogen
Lovastatin	LOV	75330-75-5	1500	5	Nongenotoxic carcinogen
Mebendazole	MBD	31431-39-7	714	1	Non-hepatocarcinogen
Megestrol Acetate	MGA	595-33-5	132	1	Non-hepatocarcinogen
Megestrol Acetate	MGA	595-33-5	132	5	Non-hepatocarcinogen
Meloxicam	MLX	71125-38-7	33	0.25	Non-hepatocarcinogen
Meloxicam	MLX	71125-38-7	33	1	Non-hepatocarcinogen
Meloxicam	MLX	71125-38-7	33	3	Non-hepatocarcinogen
Meloxicam	MLX	71125-38-7	33	5	Non-hepatocarcinogen
Mestranol	MES	72-33-3	250	1	Unknwon
Mestranol	MES	72-33-3	250	3	Unknwon
Mestranol	MES	72-33-3	250	5	Unknwon
Methapyrilene	MPy	91-80-5	100	3	Nongenotoxic carcinogen
Methimazole	MTZ	60-56-0	100	1	Non-hepatocarcinogen
Methimazole	MTZ	60-56-0	100	3	Non-hepatocarcinogen
Methotrexate	MTX	59-05-2	0.3	1	Non-hepatocarcinogen
Methyl Salicylate	MSA	119-36-8	444	0.25	Non-hepatocarcinogen
Methyl Salicylate	MSA	119-36-8	444	1	Non-hepatocarcinogen
Methyl Salicylate	MSA	119-36-8	444	3	Non-hepatocarcinogen
Methyl Salicylate	MSA	119-36-8	444	5	Non-hepatocarcinogen
Methylene Dianiline	DAPM	101-77-9	81	1	Genotoxic carcinogen
Methylene Dianiline	DAPM	101-77-9	81	3	Genotoxic carcinogen
Methylene Dianiline	DAPM	101-77-9	81	5	Genotoxic carcinogen
Methyltestosterone	MTS	58-18-4	2000	3	Non-hepatocarcinogen
Methyltestosterone	MTS	58-18-4	2000	5	Non-hepatocarcinogen
Miconazole	MIC	22916-47-8	200	0.25	Unknwon
Miconazole	MIC	22916-47-8	200	1	Unknwon
Miconazole	MIC	22916-47-8	200	3	Unknwon
Miconazole	MIC	22916-47-8	200	5	Unknwon
Miconazole	MIC	22916-47-8	920	0.25	Unknwon
Miconazole	MIC	22916-47-8	920	1	Unknwon
Miconazole	MIC	22916-47-8	920	3	Unknwon
Miconazole	MIC	22916-47-8	920	5	Unknwon
Mifepristone	MIF	122742-25-0	3	0.25	Unknwon
Mifepristone	MIF	122742-25-0	3	1	Unknwon
Mifepristone	MIF	122742-25-0	3	3	Unknwon
Mifepristone	MIF	122742-25-0	3	5	Unknwon
Mifepristone	MIF	122742-25-0	300	0.25	Unknwon
Mifepristone	MIF	122742-25-0	300	1	Unknwon
Mifepristone	MIF	122742-25-0	300	3	Unknwon
Mifepristone	MIF	122742-25-0	300	5	Unknwon
Mitomycin C	MITc	1404-00-8	0.5	0.25	Non-hepatocarcinogen
Mitomycin C	MITc	1404-00-8	0.5	5	Non-hepatocarcinogen
Mitomycin C	MITc	1404-00-8	1.7	0.25	Non-hepatocarcinogen
Mitomycin C	MITc	1404-00-8	1.7	1	Non-hepatocarcinogen
Mitomycin C	MITc	1404-00-8	1.7	3	Non-hepatocarcinogen
Mitomycin C	MITc	1404-00-8	1.7	5	Non-hepatocarcinogen
Mln-518	MLN	387867-13-2	70	1	Unknwon
Mln-518	MLN	387867-13-2	70	3	Unknwon
Mln-518	MLN	387867-13-2	70	5	Unknwon
Mln-518	MLN	387867-13-2	212	1	Unknwon
Mln-518	MLN	387867-13-2	212	3	Unknwon
Mln-518	MLN	387867-13-2	212	5	Unknwon
Modafinil	MOD	68693-11-8	325	3	Non-hepatocarcinogen
N-Nitrosodimethylamine	DMN	62-75-9	10	5	Genotoxic carcinogen
N,N-Dimethylformamide	NND	68-12-2	140	0.25	Non-hepatocarcinogen
N,N-Dimethylformamide	NND	68-12-2	140	1	Non-hepatocarcinogen
N,N-Dimethylformamide	NND	68-12-2	140	3	Non-hepatocarcinogen
N,N-Dimethylformamide	NND	68-12-2	140	5	Non-hepatocarcinogen
N,N-Dimethylformamide	NND	68-12-2	700	0.25	Non-hepatocarcinogen
N,N-Dimethylformamide	NND	68-12-2	700	1	Non-hepatocarcinogen
N,N-Dimethylformamide	NND	68-12-2	700	3	Non-hepatocarcinogen
N,N-Dimethylformamide	NND	68-12-2	700	7	Non-hepatocarcinogen
N,N-Dimethylformamide	NND	68-12-2	1400	0.25	Non-hepatocarcinogen
N,N-Dimethylformamide	NND	68-12-2	1400	1	Non-hepatocarcinogen
N,N-Dimethylformamide	NND	68-12-2	1400	3	Non-hepatocarcinogen
N,N-Dimethylformamide	NND	68-12-2	1400	5	Non-hepatocarcinogen
N,N-Dimethylformamide	NND	68-12-2	2100	0.25	Non-hepatocarcinogen
N,N-Dimethylformamide	NND	68-12-2	2100	1	Non-hepatocarcinogen
Nafenopin	NAF	3771-19-5	338	1	Nongenotoxic carcinogen
Nafenopin	NAF	3771-19-5	338	3	Nongenotoxic carcinogen
Nafenopin	NAF	3771-19-5	338	5	Nongenotoxic carcinogen
Naphthyl Isothiocyanate	ANIT	551-06-4	30	0.25	Non-hepatocarcinogen
Naphthyl Isothiocyanate	ANIT	551-06-4	30	1	Non-hepatocarcinogen
Naphthyl Isothiocyanate	ANIT	551-06-4	30	3	Non-hepatocarcinogen
Naphthyl Isothiocyanate	ANIT	551-06-4	30	7	Non-hepatocarcinogen
Naphthyl Isothiocyanate	ANIT	551-06-4	60	0.25	Non-hepatocarcinogen
Naphthyl Isothiocyanate	ANIT	551-06-4	60	1	Non-hepatocarcinogen
Naphthyl Isothiocyanate	ANIT	551-06-4	60	3	Non-hepatocarcinogen
Naphthyl Isothiocyanate	ANIT	551-06-4	60	7	Non-hepatocarcinogen
Naproxen	NPX	22204-53-1	10	3	Non-hepatocarcinogen
Neomycin	NMC	3947-65-7	56	0.25	Non-hepatocarcinogen
Nimesulide	NIM	51803-78-2	162	3	Non-hepatocarcinogen
Nimetazepam	NMZ	2011-67-8	122	1	Unknwon
Nimetazepam	NMZ	2011-67-8	122	3	Unknwon
Nimetazepam	NMZ	2011-67-8	122	5	Unknwon
Nitrazepam	NZP	146-22-5	310	3	Unknwon
Nitrosodiethylamine	DEN	55-18-5	1.67	3	Genotoxic carcinogen
Nitrosodiethylamine	DEN	55-18-5	1.67	5	Genotoxic carcinogen
Nitrosodiethylamine	DEN	55-18-5	34	0.25	Genotoxic carcinogen
Nitrosodiethylamine	DEN	55-18-5	34	1	Genotoxic carcinogen
Nitrosodiethylamine	DEN	55-18-5	34	3	Genotoxic carcinogen
Nitrosodiethylamine	DEN	55-18-5	100	5	Genotoxic carcinogen
Norethindrone	NOR	68-22-4	0.08	0.25	Unknwon
Norethindrone	NOR	68-22-4	0.08	1	Unknwon
Norethindrone	NOR	68-22-4	0.08	5	Unknwon
Norethindrone	NOR	68-22-4	375	0.25	Unknwon
Norethindrone	NOR	68-22-4	375	5	Unknwon
Norethindrone Acetate	NOA	8015-12-1	125	1	Unknwon
Norethindrone Acetate	NOA	8015-12-1	125	3	Unknwon
Norethindrone Acetate	NOA	8015-12-1	125	5	Unknwon
Nystatin	NST	1400-61-9	134	3	Unknwon
Olanzapine	OLP	132539-06-1	23	5	Non-hepatocarcinogen
Oxfendazole	OXF	53716-50-0	1500	1	Non-hepatocarcinogen
Oxymetazoline	OMZ	1491-59-4	0.5	0.25	Unknwon
Oxymetazoline	OMZ	1491-59-4	0.5	1	Unknwon
Oxymetholone	OML	434-07-1	1170	1	Nongenotoxic carcinogen
Oxymetholone	OML	434-07-1	1170	3	Nongenotoxic carcinogen
Oxymetholone	OML	434-07-1	1170	5	Nongenotoxic carcinogen
Oxytetracycline	OTC	79-57-2	1500	5	Non-hepatocarcinogen
Pantoprazole	PNZ	102625-70-7	1100	3	Nongenotoxic carcinogen
Pantoprazole	PNZ	102625-70-7	1100	5	Nongenotoxic carcinogen
Pemoline	PML	18968-99-5	70	1	Non-hepatocarcinogen
Phenobarbital	PB	50-06-6	25	0.25	Nongenotoxic carcinogen
Phenobarbital	PB	50-06-6	25	1	Nongenotoxic carcinogen
Phenobarbital	PB	50-06-6	54	1	Nongenotoxic carcinogen
Phenobarbital	PB	50-06-6	54	3	Nongenotoxic carcinogen
Phenobarbital	PB	50-06-6	54	5	Nongenotoxic carcinogen
Phenothiazine	PTZ	92-84-2	36	0.25	Unknwon
Phenothiazine	PTZ	92-84-2	36	1	Unknwon
Phenothiazine	PTZ	92-84-2	386	0.25	Unknwon
Phenothiazine	PTZ	92-84-2	386	1	Unknwon
Phenothiazine	PTZ	92-84-2	386	5	Unknwon
Piclamilast	PCL	144035-83-6	17	3	Non-hepatocarcinogen
Piclamilast	PCL	144035-83-6	17	5	Non-hepatocarcinogen
Pioglitazone	PIO	111025-46-8	300	3	Non-hepatocarcinogen
Pioglitazone	PIO	111025-46-8	1500	3	Non-hepatocarcinogen
Pioglitazone	PIO	111025-46-8	1500	5	Non-hepatocarcinogen
Pramoxine	PRA	140-65-8	526	3	Unknwon
Prednisolone	PDS	50-24-8	184	1	Nongenotoxic carcinogen
Primidone	PRI	125-33-7	750	1	Non-hepatocarcinogen
Procarbazine	PCZ	671-16-9	27	0.25	Non-hepatocarcinogen
Procarbazine	PCZ	671-16-9	27	5	Non-hepatocarcinogen
Procarbazine	PCZ	671-16-9	54	0.25	Non-hepatocarcinogen
Procarbazine	PCZ	671-16-9	54	1	Non-hepatocarcinogen
Procarbazine	PCZ	671-16-9	54	3	Non-hepatocarcinogen
Procarbazine	PCZ	671-16-9	54	5	Non-hepatocarcinogen
Progesterone	PGT	57-83-0	11.3	3	Non-hepatocarcinogen
Progesterone	PGT	57-83-0	11.3	5	Non-hepatocarcinogen
Progesterone	PGT	57-83-0	164	0.25	Non-hepatocarcinogen
Progesterone	PGT	57-83-0	164	1	Non-hepatocarcinogen
Progesterone	PGT	57-83-0	164	3	Non-hepatocarcinogen
Promethazine	PMZ	38878-40-9	2.3	3	Non-hepatocarcinogen
Promethazine	PMZ	38878-40-9	2.3	5	Non-hepatocarcinogen
Promethazine	PMZ	38878-40-9	113	3	Non-hepatocarcinogen
Promethazine	PMZ	38878-40-9	113	5	Non-hepatocarcinogen
Propylthiouracil	PTU	51-52-5	625	1	Non-hepatocarcinogen
Propylthiouracil	PTU	51-52-5	625	3	Non-hepatocarcinogen
Propylthiouracil	PTU	51-52-5	625	5	Non-hepatocarcinogen
Pyrogallol	PYR	87-66-1	1000	1	Unknwon
Pyrogallol	PYR	87-66-1	1000	3	Unknwon
Pyrogallol	PYR	87-66-1	1000	5	Unknwon
Rabeprazole	RAB	117976-89-3	1024	3	Non-hepatocarcinogen
Raloxifene	RAX	84449-90-1	6.5	0.25	Non-hepatocarcinogen
Raloxifene	RAX	84449-90-1	6.5	3	Non-hepatocarcinogen
Raloxifene	RAX	84449-90-1	6.5	5	Non-hepatocarcinogen
Raloxifene	RAX	84449-90-1	650	0.25	Non-hepatocarcinogen
Raloxifene	RAX	84449-90-1	650	1	Non-hepatocarcinogen
Raloxifene	RAX	84449-90-1	650	3	Non-hepatocarcinogen
Raloxifene	RAX	84449-90-1	650	5	Non-hepatocarcinogen
Rifampicin	RIF	72559-06-9	1500	5	Non-hepatocarcinogen
Rofecoxib	ROC	162011-90-7	775	3	Non-hepatocarcinogen
Roflumilast	ROF	162401-32-3	17	3	Unknwon
Roflumilast	ROF	162401-32-3	17	5	Unknwon
Rolipram	ROL	61413-54-5	75	3	Unknwon
Rolipram	ROL	61413-54-5	75	5	Unknwon
Rosiglitazone Maleate	RGZ	155141-29-0	1800	3	Non-hepatocarcinogen
Rosiglitazone Maleate	RGZ	155141-29-0	1800	5	Non-hepatocarcinogen
Roxithromycin	ROX	80214-83-1	312	1	Unknwon
Roxithromycin	ROX	80214-83-1	312	3	Unknwon
Roxithromycin	ROX	80214-83-1	312	5	Unknwon
Safrole	SAF	94-59-7	488	0.25	Genotoxic carcinogen
Safrole	SAF	94-59-7	488	1	Genotoxic carcinogen
Safrole	SAF	94-59-7	488	3	Genotoxic carcinogen
Safrole	SAF	94-59-7	488	5	Genotoxic carcinogen
Salicylamide	SAC	65-45-2	1300	1	Unknwon
Salicylamide	SAC	65-45-2	1300	3	Unknwon
Salicylic Acid	SAL	69-72-7	223	1	Unknwon
Salicylic Acid	SAL	69-72-7	223	5	Unknwon
Sildenafil	SIL	139755-83-2	420	5	Non-hepatocarcinogen
Simvastatin	SST	79902-63-9	15	0.25	Nongenotoxic carcinogen
Simvastatin	SST	79902-63-9	15	3	Nongenotoxic carcinogen
Simvastatin	SST	79902-63-9	1200	1	Nongenotoxic carcinogen
Simvastatin	SST	79902-63-9	1200	3	Nongenotoxic carcinogen
Sodium Arsenite	SAR	7784-46-5	10	0.25	Non-hepatocarcinogen
Sodium Arsenite	SAR	7784-46-5	30	3	Non-hepatocarcinogen
Sodium Arsenite	SAR	7784-46-5	30	7	Non-hepatocarcinogen
Sotalol	SOT	27948-47-6	2000	1	Non-hepatocarcinogen
Sotalol	SOT	27948-47-6	2000	3	Non-hepatocarcinogen
Spironolactone	SNT	52-01-7	300	1	Nongenotoxic carcinogen
Spironolactone	SNT	52-01-7	300	5	Nongenotoxic carcinogen
Stanozolol	STA	10418-03-8	150	3	Unknwon
Stavudine	SVD	3056-17-5	1400	3	Non-hepatocarcinogen
Streptozotocin	SZC	18883-66-4	138	1	Non-hepatocarcinogen
Streptozotocin	SZC	18883-66-4	138	3	Non-hepatocarcinogen
Streptozotocin	SZC	18883-66-4	138	5	Non-hepatocarcinogen
Sulindac	SUL	38194-50-2	132	0.25	Non-hepatocarcinogen
Sulindac	SUL	38194-50-2	132	1	Non-hepatocarcinogen
Sulindac	SUL	38194-50-2	132	3	Non-hepatocarcinogen
Sulindac	SUL	38194-50-2	132	5	Non-hepatocarcinogen
Tamoxifen	TMX	10540-29-1	2.5	3	Unknwon
Tamoxifen	TMX	10540-29-1	2.5	5	Unknwon
Tamoxifen	TMX	10540-29-1	64	3	Unknwon
Testosterone	TTR	571-41-5	375	3	Nongenotoxic carcinogen
Testosterone	TTR	571-41-5	375	5	Nongenotoxic carcinogen
Thiabendazole	TBZ	148-79-8	92	1	Non-hepatocarcinogen
Thioacetamide	TAA	62-55-5	200	5	Nongenotoxic carcinogen
Thioguanine	TGN	154-42-7	12	0.25	Unknwon
Thioguanine	TGN	154-42-7	12	1	Unknwon
Thioguanine	TGN	154-42-7	12	3	Unknwon
Thioguanine	TGN	154-42-7	12	5	Unknwon
Thioguanine	TGN	154-42-7	24	3	Unknwon
Thioguanine	TGN	154-42-7	24	5	Unknwon
Tosufloxacin	TFX	100490-36-6	2000	3	Unknwon
Tosufloxacin	TFX	100490-36-6	2000	5	Unknwon
Trichloroacetic Acid	CAA	76-03-9	474	1	Non-hepatocarcinogen
Troglitazone	TGZ	97322-87-7	1200	3	Non-hepatocarcinogen
Troglitazone	TGZ	97322-87-7	1200	5	Non-hepatocarcinogen
Tropisetron	TPS	89565-68-4	100	1	Non-hepatocarcinogen
Valproic Acid	VPA	99-66-1	1340	3	Non-hepatocarcinogen
Valproic Acid	VPA	99-66-1	1340	5	Non-hepatocarcinogen
Valproic Acid	VPA	99-66-1	1500	1	Non-hepatocarcinogen
Vinblastine	VBT	143-67-9	0.3	1	Unknwon
Vinblastine	VBT	143-67-9	0.3	3	Unknwon
Vinblastine	VBT	143-67-9	0.3	5	Unknwon
Vinorelbine	VNB	125317-39-7	1.5	1	Unknwon
Wy-14643	WY	50892-23-4	364	1	Nongenotoxic carcinogen
Wy-14643	WY	50892-23-4	364	3	Nongenotoxic carcinogen
Wy-14643	WY	50892-23-4	364	5	Nongenotoxic carcinogen
Zileuton	ZIL	111406-87-2	450	3	Unknwon
Zomepirac	ZOM	64092-48-4	11	1	Unknwon
Zomepirac	ZOM	64092-48-4	11	0.25	Unknwon
Zomepirac	ZOM	64092-48-4	11	5	Unknwon
Zomepirac	ZOM	64092-48-4	11	3	Unknwon
